# Supplementary material
Source: PubMed Central journal article supplement (PMC4210139)

# Asymmetric Fluorination of $\alpha$ -Branched Cyclohexanones Enabled by a Combination of Chiral Anion Phase-Transfer Catalysis and Enamine Catalysis using Protected Amino Acids

Xiaoyu Yang,<sup>†</sup> Robert J. Phipps<sup>†</sup> and F. Dean Toste\*

Department of Chemistry, University of California, Berkeley, California 94720, United States.

<sup>†</sup>X.Y. and R.J.P. contributed equally to this work.

## Table of Contents

|                                                                            |     |
|----------------------------------------------------------------------------|-----|
| General information                                                        | S2  |
| Optimization of bases, solvents and amine catalysts on substrate <b>1a</b> | S3  |
| Synthesis of amine catalysts                                               | S4  |
| Synthesis of substrates                                                    | S7  |
| Synthesis of products                                                      | S10 |
| Functionalization of products                                              | S20 |
| References                                                                 | S23 |
| X ray structure of <b>2j</b>                                               | S24 |
| HPLC traces                                                                | S30 |
| NMR spectra                                                                | S51 |

## General Information:

Unless otherwise noted, all commercial reagents were used without further purification. Selectfluor® (Sigma Aldrich, 95%) was ground in a pestle and mortar and dried at 80°C under high vacuum for 30 minutes prior to use. Na<sub>2</sub>CO<sub>3</sub>·H<sub>2</sub>O was obtained from J. T. Baker (99.7%) and ground in a pestle and mortar prior to use without further drying procedure. NaHCO<sub>3</sub>, Na<sub>2</sub>HPO<sub>4</sub> and Na<sub>3</sub>PO<sub>4</sub>·H<sub>2</sub>O were grounded in a pestle and mortar prior to use. Fluorination reactions were run in 1 dram (15 mm x 45 mm) vials fitted with a screw cap and stirred using an 8 mm magnetic stirrer bar. Dichloromethane, toluene, ether, toluene and triethylamine were purified by passage through an activated alumina column under argon. Thin-layer chromatography (TLC) analysis of reaction mixtures was performed using Merck silica gel 60 F254 TLC plates, and visualized under UV or by staining with ceric ammonium molybdate. Flash column chromatography was carried out on Merck Silica Gel 60 Å, 230 X 400 mesh. Nuclear magnetic resonance (NMR) spectra were recorded using Bruker AV-600, AV-500, AVQ-400, AVB-400 and AV-300 spectrometers. <sup>1</sup>H and <sup>13</sup>C chemical shifts are reported in ppm downfield of tetramethylsilane and referenced to residual solvent peak (CHCl<sub>3</sub>; δH = 7.26 and δC = 77.16, CH<sub>3</sub>OH; δH = 3.31 and δC = 49.00). Multiplicities are reported using the following abbreviations: s = singlet, d = doublet, t = triplet, q = quartet, m = multiplet, br = broad resonance. Mass spectral data were obtained from the Micro-Mass/Analytical Facility operated by the College of Chemistry, University of California, Berkeley. Enantiomeric excesses were determined on a Shimadzu VP Series Chiral HPLC using IA, IB or IC columns. The synthesis of phosphoric acids (**R**)-C<sub>8</sub>-TRIP, (**R**)-TRIP, (**R**)-TCYP, (**R**)-P1 and (**R**)-P2 has been previously described<sup>1</sup>. Racemic products were synthesized by carrying out the fluorination reactions with achiral phosphoric acid (**AP**) and glycine methyl ester (**A1**) in toluene.

## Optimization of bases, solvents and amine catalysts on substrates 1a

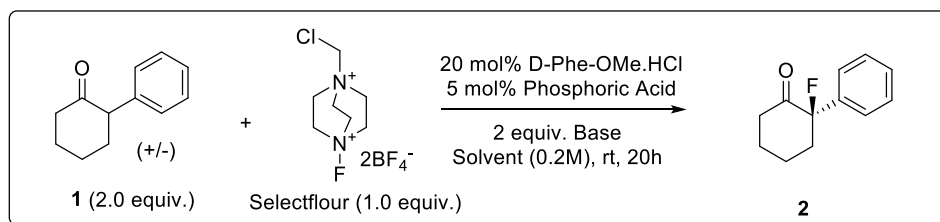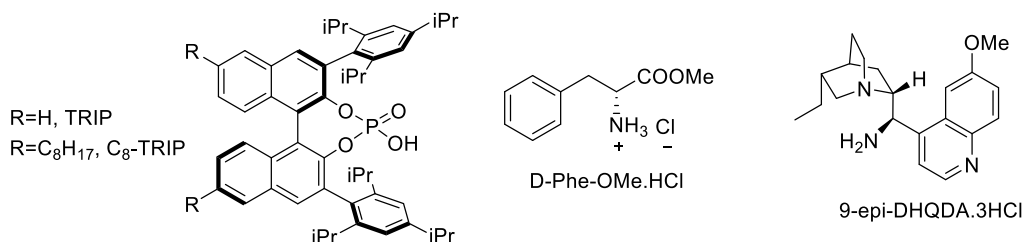

| Entry | Phosphoric Acid                  | Amine Catalyst           | Base                                              | Solv.             | Yield <b>2</b> based on: Ketone (Selectfluor) <sup>a</sup> | ee <b>2</b> <sup>b</sup> |
|-------|----------------------------------|--------------------------|---------------------------------------------------|-------------------|------------------------------------------------------------|--------------------------|
| 1     | ( <i>R</i> )-C <sub>8</sub> TRIP | D-Phe-OMe                | Na <sub>2</sub> CO <sub>3</sub> .H <sub>2</sub> O | Toluene           | 37 (74)                                                    | +88                      |
| 2     | ( <i>R</i> )-C <sub>8</sub> TRIP | D-Phe-OMe                | NaHCO <sub>3</sub>                                | Toluene           | 12 (24)                                                    | +29                      |
| 3     | ( <i>R</i> )-C <sub>8</sub> TRIP | D-Phe-OMe                | Na <sub>2</sub> HPO <sub>4</sub>                  | Toluene           | 24 (49)                                                    | +29                      |
| 4     | ( <i>R</i> )-C <sub>8</sub> TRIP | D-Phe-OMe                | Na <sub>3</sub> PO <sub>4</sub> .H <sub>2</sub> O | Toluene           | 27 (55)                                                    | +73                      |
| 5     | ( <i>R</i> )-C <sub>8</sub> TRIP | D-Phe-OMe                | Na <sub>2</sub> CO <sub>3</sub> .H <sub>2</sub> O | Benzene           | 26 (53)                                                    | +71                      |
| 6     | ( <i>R</i> )-C <sub>8</sub> TRIP | D-Phe-OMe                | Na <sub>2</sub> CO <sub>3</sub> .H <sub>2</sub> O | Hexane            | 31 (62)                                                    | +59                      |
| 7     | ( <i>R</i> )-C <sub>8</sub> TRIP | D-Phe-OMe                | Na <sub>2</sub> CO <sub>3</sub> .H <sub>2</sub> O | PhCF <sub>3</sub> | 41 (83)                                                    | +73                      |
| 8     | ( <i>R</i> )-C <sub>8</sub> TRIP | D-Phe-OMe                | Na <sub>2</sub> CO <sub>3</sub> .H <sub>2</sub> O | <i>o</i> -Xylene  | 32 (65)                                                    | +85                      |
| 9     | ( <i>R</i> )-C <sub>8</sub> TRIP | D-Phe-OMe                | Na <sub>2</sub> CO <sub>3</sub> .H <sub>2</sub> O | <i>m</i> -Xylene  | 37 (75)                                                    | +83                      |
| 10    | ( <i>R</i> )-C <sub>8</sub> TRIP | D-Phe-OMe                | Na <sub>2</sub> CO <sub>3</sub> .H <sub>2</sub> O | <i>p</i> -Xylene  | 37 (74)                                                    | +82                      |
| 11    | ( <i>R</i> )-C <sub>8</sub> TRIP | D-Phe-OMe                | Na <sub>2</sub> CO <sub>3</sub> .H <sub>2</sub> O | MTBE              | 23 (46)                                                    | +34                      |
| 12    | ( <i>R</i> )-C <sub>8</sub> TRIP | 9-epi DHQDA <sup>c</sup> | Na <sub>2</sub> CO <sub>3</sub> .H <sub>2</sub> O | Toluene           | 3 (7)                                                      | -29                      |
| 13    | ( <i>S</i> )- TRIP               | 9-epi DHQDA              | Na <sub>2</sub> CO <sub>3</sub> .H <sub>2</sub> O | Toluene           | 4 (9)                                                      | +20                      |

<sup>a</sup>Yield was determined by <sup>19</sup>F-NMR spectroscopy by comparison with the internal standard.

<sup>b</sup>Determined by chiral HPLC analysis of the crude reaction mixture after a short plug of silica gel. <sup>c</sup>Catalyst 9-epi DHQDA was synthesized according literature<sup>2</sup>.

### Synthesis of Amine catalyst:

The hydrochloride salts of amino acid methyl esters **A1**, **A2**, **A4**, **A5**, **A6**, **A9** were commercially available and used directly.

Catalyst **A3** was synthesized according literature<sup>3</sup>.

Amine catalyst **A7** and **A8** were synthesized according to the following procedure:

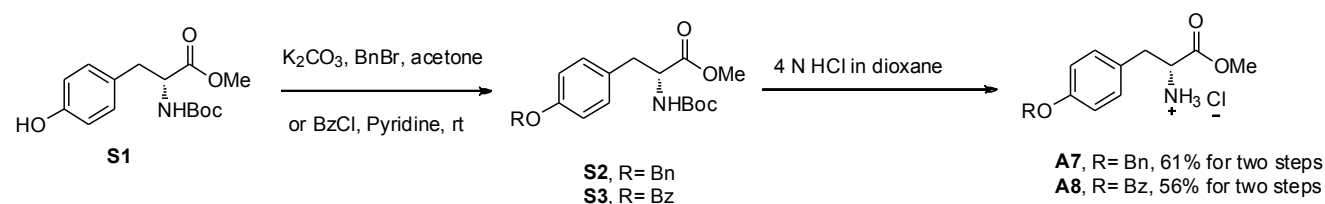

### O-Benzyl (D)-Tyrosine methyl ester hydrochloride (**A7**)

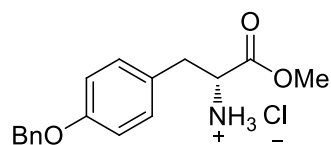

<sup>1</sup>H NMR (600 MHz, Methanol-*d*<sub>4</sub>)  $\delta$  7.42 (d,  $J$  = 7.5 Hz, 2H), 7.36 (dd,  $J$  = 8.4, 6.7 Hz, 2H), 7.30 (t,  $J$  = 7.4 Hz, 1H), 7.18 (d,  $J$  = 8.6 Hz, 2H), 6.99 (d,  $J$  = 8.4 Hz, 2H), 5.07 (s, 2H), 4.27 (t,  $J$  = 6.6 Hz, 1H), 3.79 (s, 3H), 3.20 (dd,  $J$  = 14.5, 6.1 Hz, 1H), 3.14 (dd,  $J$  = 14.5, 7.2 Hz, 1H). <sup>13</sup>C NMR (151 MHz, Methanol-*d*<sub>4</sub>)  $\delta$  170.42, 159.88, 138.59, 131.57, 129.48, 128.86, 128.50, 127.28, 116.56, 70.94, 55.31, 53.55, 36.53. *m/z* HRMS (ESI) found  $[M]^+$  286.1437, C<sub>17</sub>H<sub>20</sub>NO<sub>3</sub><sup>+</sup> requires 286.1438.

### O-Benzoyl (D)-Tyrosine methyl ester hydrochloride (**A8**)

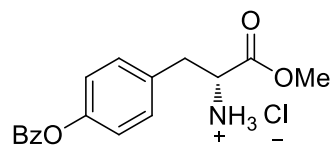

$^1\text{H}$  NMR (600 MHz, Methanol-*d*<sub>4</sub>)  $\delta$  8.18 (d,  $J$  = 7.7 Hz, 1H), 7.70 (t,  $J$  = 7.5 Hz, 1H), 7.57 (t,  $J$  = 7.7 Hz, 2H), 7.39 (d,  $J$  = 8.0 Hz, 2H), 7.26 (d,  $J$  = 8.0 Hz, 2H), 4.39 (t,  $J$  = 6.8 Hz, 1H), 3.84 (s, 3H), 3.34 (dd,  $J$  = 14.4, 6.0 Hz, 1H), 3.24 (dd,  $J$  = 14.4, 7.5 Hz, 1H).  $^{13}\text{C}$  NMR (151 MHz, Methanol-*d*<sub>4</sub>)  $\delta$  170.32, 166.79, 152.09, 135.05, 133.25, 131.75, 131.04, 130.54, 129.86, 123.59, 55.19, 53.67, 36.68.  $m/z$  HRMS (ESI) found  $[\text{M}]^+$  300.1232,  $\text{C}_{17}\text{H}_{18}\text{NO}_4^+$  requires 300.1230.

Amine catalysts **A10**, **A11** and **A13** were synthesized by esterification of the corresponding amino acids (which were purchased from Chem-Impex Int'l Inc.)

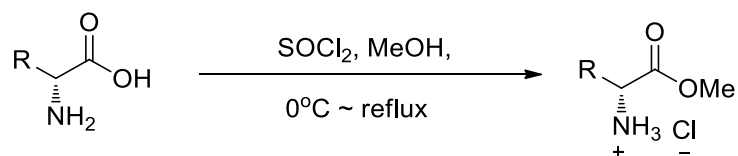

To a solution of amino acid (2.0 mmol) in MeOH (5 mL) was added  $\text{SOCl}_2$  (435  $\mu\text{L}$ , 6.0 mmol) at  $0^\circ\text{C}$ . After refluxing overnight, the mixture was concentrated under vacuum to afford the amine catalyst as white powder.

(D)-cyclohexylalanine methyl ester hydrochloride (**A10**)

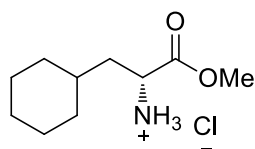

$^1\text{H}$  NMR (600 MHz, Methanol-*d*<sub>4</sub>)  $\delta$  4.03 – 3.68 (m, 4H), 2.09 – 1.45 (m, 7H), 1.42 – 0.92 (m, 6H).  $^{13}\text{C}$  NMR (151 MHz, Methanol-*d*<sub>4</sub>)  $\delta$  170.33, 58.98, 40.46, 29.51, 26.97, 26.89, 26.73.  $m/z$  HRMS (ESI) found  $[\text{M}]^+$  172.1332,  $\text{C}_{10}\text{H}_{20}\text{NO}_2^+$  requires 172.1332.

(D)-2-naphthylalanine methyl ester hydrochloride (**A11**)

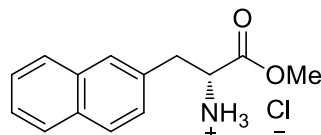

$^1\text{H}$  NMR (600 MHz, Methanol-*d*<sub>4</sub>)  $\delta$  7.91 – 7.83 (m, 3H), 7.79 (d,  $J$  = 2.0 Hz, 1H), 7.49 (tt,  $J$  = 6.8, 5.2 Hz, 2H), 7.39 (dd,  $J$  = 8.4, 1.7 Hz, 1H), 4.45 (t,  $J$  = 6.8 Hz, 1H), 3.79 (s, 3H), 3.44 (dd,  $J$  = 14.4, 6.3 Hz, 1H), 3.39 (dd,  $J$  = 14.3, 7.2 Hz, 1H).  $^{13}\text{C}$  NMR (151 MHz, Methanol-*d*<sub>4</sub>)  $\delta$

170.38, 134.95, 134.24, 132.74, 129.87, 129.59, 128.75, 128.67, 127.91, 127.43, 127.20, 55.14, 53.61, 37.47. m/z HRMS (ESI) found  $[M]^+$  230.1176,  $C_{14}H_{16}NO_2^+$  requires 230.1176.

(D)-9-anthracylalanine methyl ester hydrochloride (**A12**)

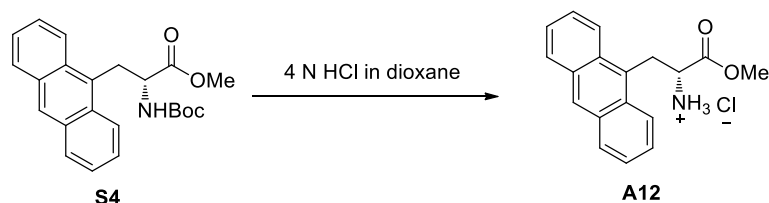

Amine catalyst **A12** was synthesized by deprotection of **S4**<sup>4</sup> with 4 N HCl in dioxane. The **S4** (100 mg, 0.26 mmol) was dissolved in 4 N HCl (3 mL). After stirring for 1 h, the mixture was concentrated *in vacuo* to afford **A12** as a yellow powder (70 mg, 85% yield). <sup>1</sup>H NMR (400 MHz, Methanol-*d*<sub>4</sub>) δ 8.46 (s, 1H), 8.23 (d, *J* = 9.1 Hz, 2H), 8.05 (d, *J* = 8.4 Hz, 2H), 7.59 (ddd, *J* = 8.7, 6.6, 1.4 Hz, 2H), 7.52 – 7.47 (m, 2H), 4.33 (t, *J* = 8.1 Hz, 1H), 4.27 – 4.15 (m, 2H), 3.17 (s, 3H). <sup>13</sup>C NMR (151 MHz, Methanol-*d*<sub>4</sub>) δ 170.55, 132.87, 131.59, 130.64, 129.09, 127.87, 126.84, 126.13, 124.23, 54.46, 53.22, 29.57. m/z HRMS (ESI) found  $[M]^+$  280.1331,  $C_{18}H_{18}NO_2^+$  requires 280.1332.

(D)-1-naphthylalanine methyl ester hydrochloride (**A13**)

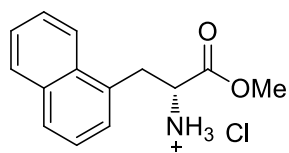

<sup>1</sup>H NMR (600 MHz, CDCl<sub>3</sub>) δ 8.08 (d, *J* = 8.5 Hz, 1H), 7.93 (d, *J* = 8.1 Hz, 1H), 7.87 (d, *J* = 8.1 Hz, 1H), 7.62 (t, *J* = 7.8 Hz, 1H), 7.54 (t, *J* = 7.6 Hz, 1H), 7.47 (t, *J* = 7.6 Hz, 1H), 7.43 (d, *J* = 7.0 Hz, 1H), 4.39 (t, *J* = 7.6 Hz, 1H), 3.78 (dd, *J* = 14.6, 7.0 Hz, 1H), 3.67 (s, 3H), 3.60 (dd, *J* = 14.4, 8.1 Hz, 1H). <sup>13</sup>C NMR (151 MHz, Methanol-*d*<sub>4</sub>) δ 170.56, 135.59, 132.91, 131.46, 130.30, 129.86, 129.28, 127.88, 127.11, 126.59, 123.88, 54.64, 53.33, 34.91. m/z HRMS (ESI) found  $[M]^+$  230.1175,  $C_{14}H_{16}NO_2^+$  requires 230.1176.

## Synthesis of substrates:

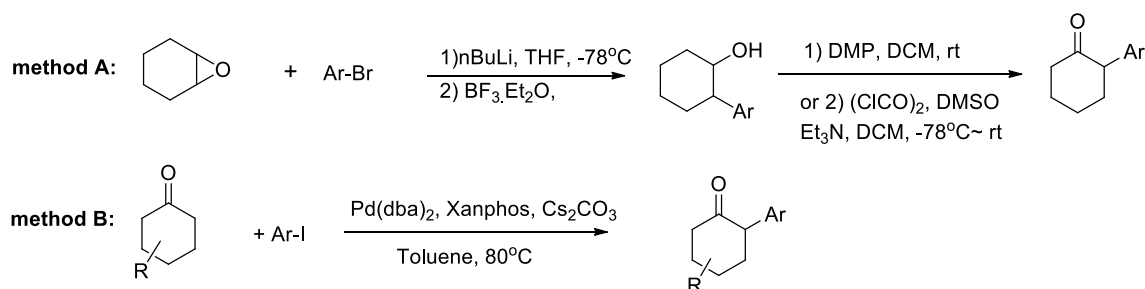

The substrates were synthesized in two ways. For phenyl substituted substrates, the substrates were synthesized in **method A**: Addition of the aryl lithium to the cyclohexene oxide afforded the alcohol, which was oxidized to the ketone by Dess-Martin Oxidation or Swern Oxidation. For cyclohexanone substituted substrates, they were synthesized according to **method B**: Direct  $\alpha$ -arylation of the ketone substrates with phenyl iodide catalyzed by  $\text{Pd}(\text{dba})_2$  and Xantphos to afford the desired products.<sup>5</sup>

Substrates **1a**, **1o** were commercial available (**1o** was used after careful chromatography to remove an isomeric impurity). Substrates **1b**, **1c**, **1d**, **1e**, **1f**, **1g**, **1h**, **1i**, **1j**, **1o**, **1p** and **1q** were synthesized according to **method A**; substrates **1k**, **1l**, **1m** were synthesized according to **method B**.

The  $^1\text{H}$  NMR of **1b**<sup>6</sup>, **1c**<sup>6</sup>, **1d**<sup>7</sup>, **1e**<sup>8</sup>, **1f**<sup>7</sup>, **1h**<sup>7</sup>, **1k**<sup>9</sup>, **1l**<sup>10</sup> and **1m**<sup>11</sup> matched the literature data. Data for the remaining compounds is given below:

2-(3-bromophenyl)cyclohexanone (**1g**)

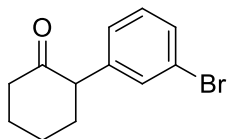

$^1\text{H}$  NMR (600 MHz,  $\text{CDCl}_3$ )  $\delta$  7.39 (d,  $J = 7.9$  Hz, 1H), 7.29 (s, 1H), 7.20 (t,  $J = 7.8$  Hz, 1H), 7.07 (d,  $J = 7.6$  Hz, 1H), 3.58 (dd,  $J = 12.5, 5.4$  Hz, 1H), 2.53 (dd,  $J = 13.3, 3.5$  Hz, 1H), 2.45 (td,  $J = 13.0, 6.0$  Hz, 1H), 2.30 – 2.22 (m, 1H), 2.16 (ddt,  $J = 9.9, 6.3, 3.8$  Hz, 1H), 2.05 – 1.92 (m, 2H), 1.88 – 1.76 (m, 2H).  $^{13}\text{C}$  NMR (151 MHz,  $\text{CDCl}_3$ )  $\delta$  209.58, 141.14, 131.74, 130.07,

129.94 127.45, 122.48, 57.13, 42.28, 35.22, 27.84, 25.42. m/z HRMS (EI) found  $[M]^+$  252.0153,  $C_{12}H_{13}BrO^+$  requires 252.0150.

2-(furan-3-yl)cyclohexanone (**1i**)

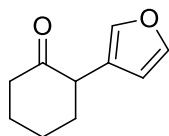

$^1H$  NMR (600 MHz,  $CDCl_3$ )  $\delta$  7.38 (s, 1H), 7.34 (s, 1H), 6.29 (s, 1H), 3.53 (dd,  $J = 11.5, 5.4$  Hz, 1H), 2.53 – 2.44 (m, 1H), 2.40 (td,  $J = 12.5, 5.9$  Hz, 1H), 2.33 – 2.24 (m, 1H), 2.12 – 2.05 (m, 1H), 1.98 – 1.91 (m, 1H), 1.90 – 1.82 (m, 1H), 1.82 – 1.71 (m, 2H).  $^{13}C$  NMR (151 MHz,  $CDCl_3$ )  $\delta$  209.89, 142.73, 139.57, 122.63, 110.69, 48.03, 41.84, 34.67, 27.81, 24.94. m/z HRMS (EI) found  $[M]^+$  164.0841,  $C_{10}H_{12}O_2^+$  requires 164.0837.

2-(3-iodophenyl)cyclohexanone (**1j**)

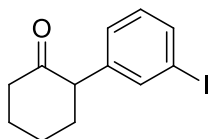

$^1H$  NMR (600 MHz,  $CDCl_3$ )  $\delta$  7.59 (d,  $J = 7.7$  Hz, 1H), 7.49 (s, 1H), 7.10 (d,  $J = 7.6$  Hz, 1H), 7.06 (t,  $J = 7.7$  Hz, 1H), 3.54 (dd,  $J = 12.5, 5.4$  Hz, 1H), 2.52 (dt,  $J = 14.0, 3.5$  Hz, 1H), 2.44 (td,  $J = 12.8, 5.8$  Hz, 1H), 2.29 – 2.20 (m, 1H), 2.18 – 2.12 (m, 1H), 2.05 – 1.91 (m, 2H), 1.87 – 1.75 (m, 2H).  $^{13}C$  NMR (151 MHz,  $CDCl_3$ )  $\delta$  209.53, 141.20, 137.59, 135.96, 130.09, 128.05, 94.43, 56.99, 42.24, 35.19, 27.79, 25.39. m/z HRMS (EI) found  $[M]^+$  300.0013,  $C_{12}H_{13}IO^+$  requires 300.0011.

2-(2-methylprop-1-en-1-yl)cyclohexanone (**1o**)

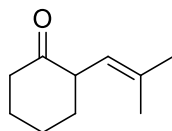

$^1H$  NMR (400 MHz,  $CDCl_3$ )  $\delta$  5.30 (dt,  $J = 8.7, 1.4$  Hz, 1H), 3.17 (td,  $J = 9.6, 5.7$  Hz, 1H), 2.51 – 2.37 (m, 1H), 2.30 (dddd,  $J = 13.5, 11.1, 5.6, 1.3$  Hz, 1H), 2.05 – 1.95 (m, 2H), 1.87 (dddd,  $J =$



12.3, 8.6, 4.6, 2.5 Hz, 1H), 1.75 (d,  $J = 1.4$  Hz, 3H), 1.78 – 1.67 (m, 2H), 1.59 (d,  $J = 1.4$  Hz, 3H), 1.62 – 1.53 (m, 1H).  $^{13}\text{C}$  NMR (151 MHz,  $\text{CDCl}_3$ )  $\delta$  211.90, 134.42, 121.81, 50.43, 41.81, 34.95, 27.90, 26.02, 24.47, 18.20.  $m/z$  HRMS (EI) found  $[\text{M}]^+$  152.1204,  $\text{C}_{10}\text{H}_{16}\text{O}^+$  requires 152.1201.

### 2-(phenylethynyl)cyclohexanone (**1p**)

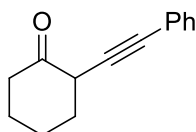

$^1\text{H}$  NMR (400 MHz,  $\text{CDCl}_3$ )  $\delta$  7.50 – 7.39 (m, 2H), 7.34 – 7.26 (m, 3H), 3.54 (ddd,  $J = 7.8, 5.1, 1.3$  Hz, 1H), 2.75 (dt,  $J = 13.3, 6.5$  Hz, 1H), 2.33 (dtd,  $J = 13.7, 7.0, 1.3$  Hz, 1H), 2.26 – 2.16 (m, 1H), 2.13 – 1.99 (m, 2H), 1.96 – 1.86 (m, 2H), 1.81 – 1.67 (m, 1H).  $^{13}\text{C}$  NMR (101 MHz,  $\text{CDCl}_3$ )  $\delta$  206.76, 131.83, 128.30, 128.20, 123.22, 86.43, 85.34, 44.75, 42.20, 34.60, 27.65, 23.25.  $m/z$  HRMS (EI) found  $[\text{M}]^+$  198.1048,  $\text{C}_{14}\text{H}_{14}\text{O}^+$  requires 198.1045.

### 2-(hex-1-yn-1-yl)cyclohexanone (**1q**)

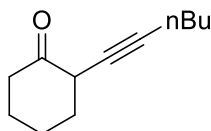

$^1\text{H}$  NMR (600 MHz,  $\text{CDCl}_3$ )  $\delta$  3.27 (t,  $J = 6.2$  Hz, 1H), 2.66 (dt,  $J = 13.1, 6.3$  Hz, 1H), 2.30 – 2.18 (m, 3H), 2.13 – 2.04 (m, 1H), 1.99 – 1.80 (m, 4H), 1.65 (dtd,  $J = 12.7, 8.4, 4.7$  Hz, 1H), 1.47 (q,  $J = 7.3$  Hz, 2H), 1.40 (q,  $J = 7.4$  Hz, 2H), 0.90 (t,  $J = 7.4$  Hz, 3H).  $^{13}\text{C}$  NMR (151 MHz,  $\text{CDCl}_3$ )  $\delta$  207.71, 85.62, 76.81, 44.23, 40.00, 34.88, 31.00, 27.65, 23.21, 22.01, 18.61, 13.68.  $m/z$  HRMS (EI) found  $[\text{M}]^+$  178.1358,  $\text{C}_{12}\text{H}_{18}\text{O}^+$  requires 178.1358.

## Synthesis of Products

General procedure for asymmetric fluorination:

To the substrate **1** (0.20 mmol) in a 1 dram (15 x 45 mm) vial equipped with an 8 mm magnetic stirrer bar was added toluene (1.0 ml). Subsequently, Na<sub>2</sub>CO<sub>3</sub>.H<sub>2</sub>O (24.8 mg, 0.20 mmol), Selectfluor (95%, 36.0 mg, 0.10 mmol), (D)-amino acid methyl ester hydrochloride salt (0.02 mmol) and (**R**)-C<sub>8</sub>-TRIP (5.0 mg, 0.005 mmol) were added. The vial was capped with a screw cap and stirred rapidly for 40 h at room temperature, the vial standing on the stirrer plate. During this time, the vial was shaken every 10 hours to agitate material adhered to the sides of the vial. After this time, the reaction was diluted with ethyl acetate and poured into satd. NaHCO<sub>3</sub> solution. After extraction, the aqueous layer was extracted with further EtOAc and the combined organics were, dried (Na<sub>2</sub>SO<sub>4</sub>) and evaporated *in vacuo*. The crude residue was purified by flash column chromatography. It is notable that fast and efficient stirring should be maintained in order to achieve reliable results.

Treatment of reagents: Selectfluor® (Sigma Aldrich, 95%) was ground in a pestle and mortar and dried at 80°C under high vacuum for 30 minutes. Na<sub>2</sub>CO<sub>3</sub>.H<sub>2</sub>O was obtained from J. T. Baker (99.7%) and ground in a pestle without further treatment.

The relevant racemic products were synthesized in the same procedure except **AP** (0.005 mmol) and glycine methyl ester hydrochloride salt (0.02 mmol) was used as catalysts.

(**R**)-2-fluoro-2-phenylcyclohexanone (**2a**)

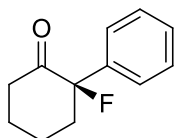

Reaction carried out according to general procedure using **1a** (35 mg, 0.20 mmol) as substrate and **A13** (5.3 mg, 0.02 mmol) as amine catalyst. Purification by column chromatography (7 : 3, Hexane : DCM) gave the title compound **2a** as an oil (11.7 mg, 0.0609 mmol, 30% based on ketone, 61% based on Selectfluor) with recovered **1a** (14.1 mg, 40%). <sup>1</sup>H NMR (400 MHz, CDCl<sub>3</sub>) δ 7.49 – 7.35 (m, 5H), 2.75 (dq, *J* = 12.5, 6.0 Hz, 1H), 2.64 (dddd, *J* = 19.3, 14.3, 7.7, 4.0 Hz, 1H), 2.40 (ddd, *J* = 13.7, 8.0, 6.1 Hz, 1H), 2.30 (tdd, *J* = 13.3, 8.6, 4.1 Hz, 1H), 2.13 –

2.01 (m, 1H), 2.01 – 1.89 (m, 2H), 1.81 (ddq,  $J = 12.8, 8.5, 4.2$  Hz, 1H).  $^{19}\text{F}$  NMR (376 MHz,  $\text{CDCl}_3$ )  $\delta$  -140.90 (t,  $J = 16.3$  Hz).  $^{13}\text{C}$  NMR (151 MHz,  $\text{CDCl}_3$ )  $\delta$  206.33 (d,  $J = 22.2$  Hz), 136.13 (d,  $J = 21.6$  Hz), 129.12 (d,  $J = 2.6$  Hz), 128.70 (s), 126.41 (d,  $J = 6.2$  Hz), 98.29 (d,  $J = 184.0$  Hz), 39.97 (s), 37.91 (d,  $J = 22.7$  Hz), 27.57 (s), 22.25 (d,  $J = 6.9$  Hz).  $m/z$  HRMS (EI) found  $[\text{M}]^+$  192.0948,  $\text{C}_{12}\text{H}_{13}\text{FO}^+$  requires 192.0950. HPLC (Chiralpak IA column, 99:1 hexanes/ isopropanol, 1 ml/min;  $t_r = 15.1$  min (major), 16.6 min (minor); 94% ee. Recovered **1a**: HPLC (Chiralpak IA column, 98:2 hexanes/ isopropanol, 1 ml/min;  $t_r = 10.8$  min (major), 11.3 min (minor); 4% ee.

(*R*)-2-fluoro-2-(naphthalen-2-yl)cyclohexanone (**2b**)

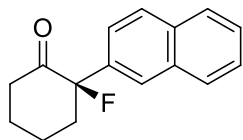

Reaction carried out according to general procedure using **1b** (44.8 mg, 0.20 mmol) as substrate and **A13** (5.3 mg, 0.02 mmol) as amine catalyst. Purification by column chromatography (7 : 3, Hexane : DCM) gave the title compound **2b** as an oil (13.8 mg, 0.0570 mmol, 29% based on ketone, 57% based on Selectfluor).  $^1\text{H}$  NMR (600 MHz,  $\text{CDCl}_3$ )  $\delta$  7.85-7.91 (m, 4 H), 7.52 (m, 2 H), 7.47 (d,  $J = 8.6$  Hz, 1H), 2.79 (m, 2 H), 2.35-2.46 (m, 2 H), 2.11 (m, 1 H), 1.98 (m, 2 H), 1.89 (m, 1 H).  $^{19}\text{F}$  NMR (376 MHz,  $\text{CDCl}_3$ )  $\delta$  -140.37 (t,  $J = 16.3$  Hz).  $^{13}\text{C}$  NMR (151 MHz,  $\text{CDCl}_3$ )  $\delta$  206.44 (d,  $J = 22.3$  Hz), 133.69 (d,  $J = 21.5$  Hz), 133.49 (d,  $J = 1.8$  Hz), 133.10 (s), 128.56(s), 127.77 (s), 127.00 (s), 126.59(s), 125.98 (d,  $J = 7.5$  Hz), 123.96 (d,  $J = 5.1$  Hz), 98.51 (d,  $J = 184.0$  Hz), 40.12 (s), 38.09 (d,  $J = 22.5$  Hz), 27.67 (s), 22.42 (d,  $J = 6.6$  Hz).  $m/z$  HRMS (EI) found  $[\text{M}]^+$  242.1111,  $\text{C}_{16}\text{H}_{15}\text{FO}^+$  requires 242.1107. HPLC (Chiralpak IC column, 95:5 hexanes/ isopropanol, 1 ml/min;  $t_r = 15.4$  min (major), 18.5 min (minor); 91% ee.

(*R*)-2-fluoro-2-(*p*-tolyl)cyclohexanone (**2c**)

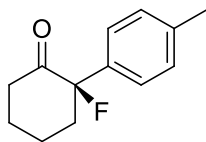

Reaction carried out according to general procedure using **1c** (37.6 mg, 0.20 mmol) as substrate and **A13** (5.3 mg, 0.02 mmol) as amine catalyst. Purification by column chromatography (7 : 3,

Hexane : DCM) gave the title compound **2c** as an oil (12.8 mg, 0.0621 mmol, 31% based on ketone, 62% based on Selectfluor).  $^1\text{H}$  NMR (600 MHz,  $\text{CDCl}_3$ )  $\delta$  7.29 (d,  $J = 7.8$  Hz, 2H), 7.23 (d,  $J = 7.9$  Hz, 2H), 2.68 (m, 2 H), 2.40 (m, 1 H), 2.37 (s, 3 H), 2.26 (tdd,  $J = 13.5, 9.4, 3.9$  Hz, 1H), 2.03 (m, 1 H), 1.92 (m, 2 H), 1.79 (dtt,  $J = 13.1, 8.6, 4.4$  Hz, 1H).  $^{19}\text{F}$  NMR (376 MHz,  $\text{CDCl}_3$ )  $\delta$  -138.44 (t,  $J = 15.0$  Hz).  $^{13}\text{C}$  NMR (151 MHz,  $\text{CDCl}_3$ )  $\delta$  206.58 (d,  $J = 21.8$  Hz), 139.23 (d,  $J = 2.8$  Hz), 133.15 (d,  $J = 21.8$  Hz), 129.53 (s), 126.50 (d,  $J = 5.7$  Hz), 98.28 (d,  $J = 184.1$  Hz), 40.06 (s), 37.74 (d,  $J = 22.7$  Hz), 27.65 (s), 22.47 (d,  $J = 7.2$  Hz), 21.29 (s).  $m/z$  HRMS (EI) found  $[\text{M}]^+$  206.1111,  $\text{C}_{13}\text{H}_{15}\text{FO}^+$  requires 206.1107. HPLC (Chiralpak IC column, 96:4 hexanes/ isopropanol, 1 ml/min;  $t_r = 14.8$  min (major), 18.3 min (minor); 90% ee.

(*R*)-2-(4-chlorophenyl)-2-fluorocyclohexanone (**2d**)

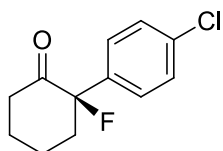

Reaction carried out according to general procedure using **1d** (41.6 mg, 0.20 mmol) as substrate and **A13** (5.3 mg, 0.02 mmol) as amine catalyst. Purification by column chromatography (7 : 3, Hexane : DCM) gave the title compound **2d** as white solid (14.2 mg, 0.0628 mmol, 31% based on ketone, 63% based on selectfluor).  $^1\text{H}$  NMR (400 MHz,  $\text{CDCl}_3$ )  $\delta$  7.38 (dd,  $J = 8.6, 1.1$  Hz, 2H), 7.31 (dd,  $J = 8.6, 1.1$  Hz, 2H), 2.81 (ddt,  $J = 14.3, 9.5, 5.5$  Hz, 1H), 2.59 – 2.24 (m, 3H), 2.14 – 1.96 (m, 2H), 1.97 – 1.84 (m, 1H), 1.79 (m, 1 H).  $^{19}\text{F}$  NMR (376 MHz,  $\text{CDCl}_3$ )  $\delta$  -144.91 (m).  $^{13}\text{C}$  NMR (151 MHz,  $\text{CDCl}_3$ )  $\delta$  205.78 (d,  $J = 23.4$  Hz), 135.12 (d,  $J = 25.0$  Hz), 135.05 (s), 128.82 (s), 127.76 (d,  $J = 7.0$  Hz), 97.96 (d,  $J = 183.3$  Hz), 39.80 (s), 38.57 (d,  $J = 22.9$  Hz), 27.63 (s), 21.90 (d,  $J = 5.8$  Hz).  $m/z$  HRMS (EI) found  $[\text{M}]^+$  226.0564,  $\text{C}_{12}\text{H}_{12}\text{ClFO}^+$  requires 226.0561. HPLC (Chiralpak IC column, 95:5 hexanes/ isopropanol, 1 ml/min;  $t_r = 6.6$  min (major), 7.0 min (minor); 90% ee.

(*R*)-2-(4-bromophenyl)-2-fluorocyclohexanone (**2e**)

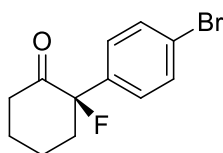

Reaction carried out according to general procedure using **1e** (50.4 mg, 0.20 mmol) as substrate and **A2** (4.3 mg, 0.02 mmol) as amine catalyst. Purification by column chromatography (7 : 3, Hexane : DCM) gave the title compound **2e** as white solid (16.5 mg, 0.0611 mmol, 31% based on ketone, 61% based on Selectfluor). <sup>1</sup>H NMR (400 MHz, CDCl<sub>3</sub>) δ 7.54 (d, *J* = 8.0 Hz, 1H), 7.24 (dd, *J* = 8.6, 1.1 Hz, 1H), 2.82 (ddt, *J* = 14.5, 9.2, 5.5 Hz, 1H), 2.56 – 2.37 (m, 2H), 2.32 (dddd, *J* = 14.3, 12.4, 7.1, 3.9, 1.7 Hz, 1H), 2.15 – 1.97 (m, 2H), 1.90 (dddt, *J* = 10.4, 9.0, 6.0, 2.9 Hz, 1H), 1.79 (dtd, *J* = 13.8, 7.0, 3.7 Hz, 1H). <sup>19</sup>F NMR (376 MHz, CDCl<sub>3</sub>) δ -145.56 (m). <sup>13</sup>C NMR (151 MHz, CDCl<sub>3</sub>) δ 205.73 (d, *J* = 23.6 Hz), 135.65 (d, *J* = 21.9 Hz), 131.77 (s), 128.03 (d, *J* = 7.1 Hz), 123.27 (d, *J* = 2.7 Hz), 98.02 (d, *J* = 183.3 Hz), 39.78 (s), 38.57 (d, *J* = 22.8 Hz), 27.63, 21.87 (d, *J* = 5.7 Hz). *m/z* HRMS (EI) found [M]<sup>+</sup> 270.0063, C<sub>12</sub>H<sub>12</sub>BrFO<sup>+</sup> requires 270.0056. HPLC (Chiralpak IC column, 95:5 hexanes/ isopropanol, 1 ml/min; *t*<sub>r</sub> = 9.5 min (major), 10.2 min (minor); 83% ee.

(*R*)-2-fluoro-2-(*m*-tolyl)cyclohexanone (**2f**)

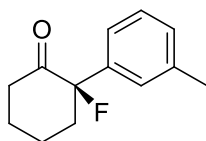

Reaction carried out according to general procedure using **1f** (37.6 mg, 0.20 mmol) as substrate and **A13** (5.3 mg, 0.02 mmol) as amine catalyst. Purification by column chromatography (7 : 3, Hexane : DCM) gave the title compound **2f** as an oil (12.2 mg, 0.0592 mmol, 30% based on ketone, 59% based on Selectfluor). <sup>1</sup>H NMR (400 MHz, CDCl<sub>3</sub>) δ 7.31 (dd, *J* = 8.6, 7.5 Hz, 1H), 7.22 – 7.18 (m, 3H), 2.79 – 2.55 (m, 2H), 2.39 (m, 1 H), 2.37 (s, 3 H), 2.27 (dddd, *J* = 13.5, 12.2, 9.3, 4.1 Hz, 1H), 2.05 (dddt, *J* = 12.1, 7.7, 4.8, 1.4 Hz, 1H), 1.99 – 1.89 (m, 2H), 1.82 (ddt, *J* = 13.0, 10.3, 3.8 Hz, 1H). <sup>19</sup>F NMR (376 MHz, CDCl<sub>3</sub>) δ -139.28 (t, *J* = 13.3 Hz). <sup>13</sup>C NMR (151 MHz, CDCl<sub>3</sub>) δ 206.45 (d, *J* = 21.5 Hz), 138.54 (s), 136.10 (d, *J* = 21.5 Hz), 129.99 (d, *J* = 2.7 Hz), 128.68 (s), 127.22 (d, *J* = 6.0 Hz), 123.50 (d, *J* = 5.9 Hz), 98.37 (d, *J* = 184.0 Hz), 40.09 (s), 37.87 (d, *J* = 22.6 Hz), 27.64 (s), 22.44 (d, *J* = 7.0 Hz), 21.64 (s). *m/z* HRMS (EI) found [M]<sup>+</sup> 206.1107, C<sub>13</sub>H<sub>15</sub>FO<sup>+</sup> requires 206.1107. HPLC (Chiralpak IB column, 99:1 hexanes/ isopropanol, 1 ml/min; *t*<sub>r</sub> = 9.2 min (minor), 10.0 min (major); 92% ee.

(*R*)-2-(3-bromophenyl)-2-fluorocyclohexanone (**2g**)

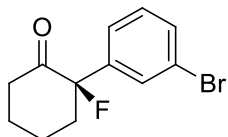

Reaction carried out according to general procedure using **1g** (50.4 mg, 0.20 mmol) as substrate and **A2** (4.3 mg, 0.02 mmol) as amine catalyst. Purification by column chromatography (7 : 3, Hexane : DCM) gave the title compound **2g** as white solid (16.7 mg, 0.0619 mmol, 31% based on ketone, 62% based on selectfluor).  $^1\text{H}$  NMR (400 MHz,  $\text{CDCl}_3$ )  $\delta$  7.55 – 7.48 (m, 2H), 7.31 – 7.27 (m, 2H), 2.91 – 2.77 (m, 1H), 2.55 – 2.25 (m, 3H), 2.14 – 1.98 (m, 2H), 1.91 (tdd,  $J$  = 13.4, 6.6, 3.5 Hz, 1H), 1.80 (dtd,  $J$  = 13.3, 6.7, 3.5 Hz, 1H).  $^{19}\text{F}$  NMR (376 MHz,  $\text{CDCl}_3$ )  $\delta$  -146.31 (m).  $^{13}\text{C}$  NMR (151 MHz,  $\text{CDCl}_3$ )  $\delta$  205.49 (d,  $J$  = 23.5 Hz), 138.89 (d,  $J$  = 21.9 Hz), 132.00 (d,  $J$  = 2.1 Hz), 130.10 (s), 129.35 (d,  $J$  = 7.9 Hz), 124.98 (d,  $J$  = 7.0 Hz), 122.75 (s), 97.82 (d,  $J$  = 183.8 Hz), 39.78 (s), 38.68 (d,  $J$  = 22.7 Hz), 27.60 (s), 21.80 (d,  $J$  = 5.6 Hz).  $m/z$  HRMS (EI) found  $[\text{M}]^+$  270.0060,  $\text{C}_{12}\text{H}_{12}\text{BrFO}^+$  requires 270.0056. HPLC (Chiralpak IC column, 98:2 hexanes/ isopropanol, 1 ml/min;  $t_r$  = 9.6 min (major), 10.7 min (minor); 93% ee.

*(R)*-2-fluoro-2-(3-methoxyphenyl)cyclohexanone (**2h**)

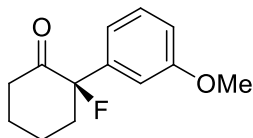

Reaction carried out according to general procedure using **1h** (40.8 mg, 0.20 mmol) as substrate and **A13** (5.3 mg, 0.02 mmol) as amine catalyst. Purification by column chromatography (4 : 6, Hexane : DCM) gave the title compound **2h** as an oil (16.2 mg, 0.0730 mmol, 36% based on ketone, 73% based on selectfluor).  $^1\text{H}$  NMR (400 MHz,  $\text{CDCl}_3$ )  $\delta$  7.34 (tt,  $J$  = 7.8, 1.0 Hz, 1H), 6.98 (m, 1H), 6.96 – 6.88 (m, 2H), 3.81 (s, 3H), 2.78 – 2.68 (m, 1H), 2.63 (tdd,  $J$  = 14.2, 7.4, 3.5 Hz, 1H), 2.40 (dt,  $J$  = 13.8, 7.2 Hz, 1H), 2.35 – 2.21 (m, 1H), 2.11 – 2.00 (m, 1H), 2.00 – 1.89 (m, 2H), 1.88 – 1.76 (m, 1H).  $^{19}\text{F}$  NMR (376 MHz,  $\text{CDCl}_3$ )  $\delta$  -140.55 (t,  $J$  = 13.8 Hz).  $^{13}\text{C}$  NMR (151 MHz,  $\text{CDCl}_3$ )  $\delta$  206.15 (d,  $J$  = 22.1 Hz), 159.89 (s), 137.70 (d,  $J$  = 21.6 Hz), 129.79 (s), 118.72 (d,  $J$  = 6.0 Hz), 114.53 (d,  $J$  = 2.4 Hz), 112.38 (d,  $J$  = 6.7 Hz), 98.21 (d,  $J$  = 184.3 Hz), 55.41 (s), 40.00 (s), 37.98 (d,  $J$  = 22.5 Hz), 27.55 (s), 22.35 (d,  $J$  = 6.9 Hz).  $m/z$  HRMS (EI)

found  $[M]^+$  222.1060,  $C_{12}H_{15}FO^+$  requires 222.1056. HPLC (Chiralpak IC column, 94:6 hexanes/isopropanol, 1 ml/min;  $t_r$  = 17.4 min (major), 19.4 min (minor); 93% ee.

(*R*)-2-fluoro-2-(furan-3-yl)cyclohexanone (**2i**)

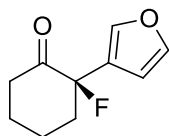

Reaction was carried out according to general procedure using **1i** (32.8 mg, 0.20 mmol) as substrate and **A12** (6.3 mg, 0.02 mmol) as amine catalyst. Purification by column chromatography (5 : 5, Hexane : DCM) gave the title compound **2i** as an oil (11.3 mg, 0.0621 mmol, 31% based on ketone, 62% based on selectfluor).  $^1H$  NMR (400 MHz,  $CDCl_3$ )  $\delta$  7.55 (d,  $J$  = 3.4 Hz, 1H), 7.45 (s, 1H), 6.42 (d,  $J$  = 2.1 Hz, 1H), 2.75 – 2.63 (m, 1H), 2.54 – 2.39 (m, 2H), 2.30 (tdd,  $J$  = 13.7, 9.7, 4.1 Hz, 1H), 2.08 – 1.83 (m, 3H), 1.77 (ddt,  $J$  = 13.5, 8.9, 4.4 Hz, 1H).  $^{19}F$  NMR (376 MHz,  $CDCl_3$ )  $\delta$  -138.12 (t,  $J$  = 13.8 Hz).  $^{13}C$  NMR (151 MHz,  $CDCl_3$ )  $\delta$  205.49 (d,  $J$  = 21.7 Hz), 143.82 (s), 141.29 (d,  $J$  = 8.3 Hz), 122.79 (d,  $J$  = 25.2 Hz), 94.20 (d,  $J$  = 181.4 Hz), 39.57 (s), 38.44 (d,  $J$  = 22.9 Hz), 27.34 (s), 22.37 (d,  $J$  = 6.6 Hz).  $m/z$  HRMS (EI) found  $[M]^+$  182.0742,  $C_{10}H_{11}FO_2^+$  requires 182.0743 HPLC (Chiralpak IA column, 98:2 hexanes/isopropanol, 1 ml/min;  $t_r$  = 9.5 min (major), 11.0 min (minor); 89% ee.

(*R*)-2-fluoro-2-(3-iodophenyl)cyclohexanone (**2j**)

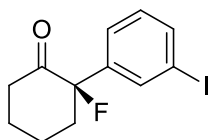

Reaction carried out according to general procedure using **1j** (60.0 mg, 0.20 mmol) as substrate and **A2** (4.3 mg, 0.02 mmol) as amine catalyst. Purification by column chromatography (7 : 3, Hexane : DCM) gave the title compound **2j** as white solid (17.8 mg, 0.0560 mmol, 28% based on ketone, 56% based on selectfluor).  $^1H$  NMR (400 MHz,  $CDCl_3$ )  $\delta$  7.75 – 7.67 (m, 2H), 7.32 (d,  $J$  = 7.9 Hz, 1H), 7.14 (t,  $J$  = 7.9 Hz, 1H), 2.83 (ddt,  $J$  = 14.5, 9.6, 5.5 Hz, 1H), 2.53 – 2.37 (m, 2H), 2.37 – 2.26 (m, 1H), 2.14 – 1.97 (m, 2H), 1.96 – 1.85 (m, 1H), 1.85 – 1.74 (m, 1H).  $^{19}F$  NMR (376 MHz,  $CDCl_3$ )  $\delta$  -146.10 (m).  $^{13}C$  NMR (151 MHz,  $CDCl_3$ )  $\delta$  205.55 (d,  $J$  = 23.6 Hz),

138.86 (d,  $J = 21.7$  Hz), 137.98 (d,  $J = 2.1$  Hz), 135.15 (d,  $J = 7.8$  Hz), 130.23 (s), 125.61 (d,  $J = 6.9$  Hz), 97.69 (d,  $J = 184.0$  Hz), 94.42 (s), 39.80 (s), 38.63 (d,  $J = 22.8$  Hz), 27.61 (s), 21.82 (d,  $J = 5.6$  Hz).).  $m/z$  HRMS (EI) found  $[M]^+$  317.9912,  $C_{12}H_{12}FO^+$  requires 317.9917. HPLC (Chiralpak IC column, 96:4 hexanes/ isopropanol, 1 ml/min;  $t_r = 8.0$  min (major), 8.6 min (minor); 90% ee.

(*R*)-7-fluoro-7-phenyl-1,4-dioxaspiro[4.5]decan-8-one (**2k**)

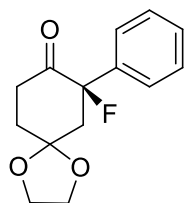

Reaction was carried out according to general procedure using **1k** (46.4 mg, 0.20 mmol) as substrate and **A13** (5.3 mg, 0.02 mmol) as amine catalyst. Purification by column chromatography (2: 8, Hexane : DCM) gave the title compound **2k** as an oil (15.8 mg, 0.0632 mmol, 32% based on ketone, 63% based on selectfluor).  $^1H$  NMR (400 MHz,  $CDCl_3$ )  $\delta$  7.47 – 7.35 (m, 5H), 4.21 – 3.95 (m, 4H), 2.95 – 2.77 (m, 2H), 2.67 – 2.52 (m, 2H), 2.26 – 2.04 (m, 2H).  $^{19}F$  NMR (376 MHz,  $CDCl_3$ )  $\delta$  -139.16 (t,  $J = 20.4$  Hz).  $^{13}C$  NMR (151 MHz,  $CDCl_3$ )  $\delta$  204.45 (d,  $J = 22.3$  Hz), 136.38 (d,  $J = 21.9$  Hz), 129.12 (d,  $J = 2.4$  Hz), 128.45 (s), 126.30 (d,  $J = 7.3$  Hz), 107.01 (d,  $J = 6.3$  Hz), 96.34 (d,  $J = 184.0$  Hz), 64.98(s), 64.74 (s), 53.56 (s), 45.79 (d,  $J = 22.7$  Hz), 35.13 (d,  $J = 77.7$  Hz).  $m/z$  HRMS (EI) found  $[M]^+$  250.1008,  $C_{14}H_{15}FO_3^+$  requires 250.1005. HPLC (Chiralpak IA column, 97:3 hexanes/ isopropanol, 1 ml/min;  $t_r = 14.2$  min (major), 20.5 min (minor); 92% ee.

(*S*)-3-fluoro-3-phenyldihydro-2H-pyran-4(3H)-one (**2l**)

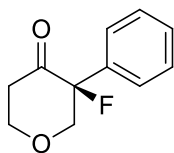

Reaction was carried out according to general procedure using **1l** (36.2 mg, 0.20 mmol) as substrate and **A13** (5.3 mg, 0.02 mmol) as amine catalyst. Purification by column chromatography (3: 7, Hexane : DCM) gave the title compound **2l** as an oil (10.7 mg, 0.0552



mmol, 28% based on ketone, 55% based on selectfluor).  $^1\text{H}$  NMR (600 MHz,  $\text{CDCl}_3$ )  $\delta$  7.62 (d,  $J = 7.4$  Hz, 2H), 7.46 – 7.37 (m, 3H), 4.58 (dd,  $J = 12.1, 5.7$  Hz, 1H), 4.25 (dt,  $J = 10.3, 4.5$  Hz, 1H), 4.01 – 3.89 (m, 2H), 2.71 (ddd,  $J = 16.1, 10.2, 6.4$  Hz, 1H), 2.63 (dd,  $J = 14.9, 4.0$  Hz, 1H).  $^{19}\text{F}$  NMR (376 MHz,  $\text{CDCl}_3$ )  $\delta$  -155.69 (m).  $^{13}\text{C}$  NMR (151 MHz,  $\text{CDCl}_3$ )  $\delta$  201.43 (d,  $J = 19.7$  Hz), 135.08 (d,  $J = 22.1$  Hz), 129.53 (d,  $J = 2.0$  Hz), 128.89 (s), 126.31 (d,  $J = 6.6$  Hz), 94.94 (d,  $J = 189.8$  Hz), 74.37 (d,  $J = 29.5$  Hz), 68.71 (s), 40.90 (s).  $m/z$  HRMS (EI) found  $[\text{M}]^+$  194.0744,  $\text{C}_{11}\text{H}_{11}\text{FO}_2^+$  requires 194.0743. HPLC (Chiralpak IC column, 95:5 hexanes/isopropanol, 1 ml/min;  $t_r = 9.9$  min (major), 10.7 min (minor); 86% ee.

(*S*)-tert-butyl 3-fluoro-4-oxo-3-phenylpiperidine-1-carboxylate (**1m**)

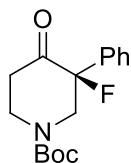

Reaction was carried out according to general procedure using **1m** (55.0 mg, 0.20 mmol) as substrate and **A13** (5.3 mg, 0.02 mmol) as amine catalyst. Purification by column chromatography (1: 9, Hexane : DCM) gave the title compound **1m** as two rotamers (14.1 mg, 0.048 mmol, 24% based on ketone, 48% based on selectfluor) without characterization.

(*S*)-3-fluoro-3-phenyl-1-tosylpiperidin-4-one (**1m'**)

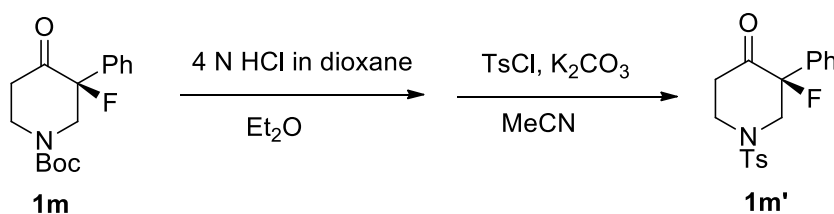

To a solution of **1m** (14.1 mg, 0.048 mmol) in  $\text{Et}_2\text{O}$  (1 mL) was added 4 N HCl in dioxane (1 mL). After consumption of the S.M. by TLC, the mixture was concentrated under vacuum to afford the product as oil.

To the solution of this oil in MeCN (2 ml) was added TsCl (18 mg, 0.096 mmol) and  $\text{K}_2\text{CO}_3$  (20 mg, 0.144 mmol). After stirring overnight, the mixture was diluted with EA and washed with brine. The organic layer was then dried with  $\text{Na}_2\text{SO}_4$ , filtered and concentrated *in vacuo* to afford

a residue, which was purified by column chromatography (2: 8, Hexane : DCM) to give the title compound **1m'** as an oil (11.3 mg, 68%). <sup>1</sup>H NMR (400 MHz, CDCl<sub>3</sub>) δ 7.74 – 7.63 (m, 4H), 7.48 – 7.42 (m, 3H), 7.39 (d, *J* = 8.0 Hz, 2H), 4.56 (ddd, *J* = 12.3, 4.8, 2.3 Hz, 1H), 3.94 (ddt, *J* = 12.0, 5.9, 2.9 Hz, 1H), 3.05 (t, *J* = 11.4 Hz, 1H), 2.90 (td, *J* = 11.4, 3.6 Hz, 1H), 2.70 (ddd, *J* = 14.3, 11.2, 6.1 Hz, 1H), 2.60 – 2.51 (m, 1H), 2.46 (s, 3H). <sup>19</sup>F NMR (376 MHz, CDCl<sub>3</sub>) δ -146.46 (m). <sup>13</sup>C NMR (151 MHz, CDCl<sub>3</sub>) δ 201.08 (d, *J* = 19.8 Hz), 144.80 (s), 134.07 (d, *J* = 21.5 Hz), 132.39 (s), 130.26 (s), 130.02 (d, *J* = 2.7 Hz), 129.17 (s), 127.84 (s), 126.77 (d, *J* = 5.6 Hz), 94.05 (d, *J* = 189.6 Hz), 53.71 (d, *J* = 32.9 Hz), 46.77 (s), 38.32 (s), 21.74 (s). *m/z* HRMS (EI) found [M]<sup>+</sup> 347.0997, C<sub>18</sub>H<sub>18</sub>FNO<sub>3</sub>S<sup>+</sup> requires 347.0091. HPLC (Chiralpak IA column, 95:5 hexanes/ isopropanol, 1 ml/min; *tr* = 26.3 min (minor), 28.1 min (major); 86% ee.

(*R*)-1-fluoro-[1,1'-bi(cyclohexan)]-1'-en-2-one (**2n**)

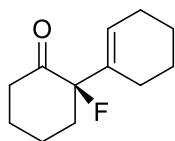

Reaction was carried out according to general procedure using **1n** (35.6 mg, 0.20 mmol) as substrate and **A13** (5.3 mg, 0.02 mmol) as amine catalyst. Purification by column chromatography (6: 4, Hexane : DCM) gave the title compound **2n** as an oil (10.2 mg, 0.0520 mmol, 26% based on ketone, 52% based on selectfluor). <sup>1</sup>H NMR (600 MHz, CDCl<sub>3</sub>) δ 5.91 (d, *J* = 4.2 Hz, 1H), 2.56 (dt, *J* = 14.2, 5.0 Hz, 1H), 2.49 – 2.39 (m, 2H), 2.18 – 2.02 (m, 3H), 1.97 – 1.81 (m, 4H), 1.81 – 1.72 (m, 1H), 1.72 – 1.62 (m, 3H), 1.61 – 1.54 (m, 2H). <sup>19</sup>F NMR (376 MHz, CDCl<sub>3</sub>) δ -144.37 (s). <sup>13</sup>C NMR (151 MHz, CDCl<sub>3</sub>) δ 207.65 (d, *J* = 19.9 Hz), 133.75 (d, *J* = 19.9 Hz), 128.95 (d, *J* = 8.9 Hz), 99.57 (d, *J* = 182.5 Hz), 40.48 (s), 35.82 (d, *J* = 22.8 Hz), 27.54 (s), 25.54 (d, *J* = 1.5 Hz), 24.04 (d, *J* = 2.0 Hz), 22.74 (d, *J* = 8.3 Hz), 22.55 (s), 21.96 (s). *m/z* HRMS (EI) found [M]<sup>+</sup> 196.1207, C<sub>12</sub>H<sub>17</sub>FO<sup>+</sup> requires 196.1203. HPLC (Chiralpak IC column, 95:5 hexanes/ isopropanol, 1 ml/min; *tr* = 10.4 min (minor), 11.5 min (major); 86% ee.

(*R*)-2-fluoro-2-(2-methylprop-1-en-1-yl)cyclohexanone (**2o**)

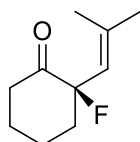

Reaction was carried out according to general procedure using **1o** (30.4 mg, 0.20 mmol) as substrate and **A12** (6.3 mg, 0.02 mmol) as amine catalyst. Purification by column chromatography (300: 1, Toluene : EA) gave the title compound **2o** as an **volatile liquid** (11.9 mg, 0.0700 mmol, 35% based on ketone, 70% based on selectfluor).  $^1\text{H}$  NMR (600 MHz,  $\text{CDCl}_3$ )  $\delta$  5.41 (d,  $J = 13.5$  Hz, 1H), 2.52 – 2.43 (m, 2H), 2.21 (td,  $J = 8.2, 6.7, 3.8$  Hz, 1H), 2.04 – 1.92 (m, 2H), 1.93 – 1.86 (m, 1H), 1.79 (d,  $J = 4.4$  Hz, 3H), 1.76 – 1.67 (m, 5H).  $^{19}\text{F}$  NMR (376 MHz,  $\text{CDCl}_3$ )  $\delta$  -145.27 (s).  $^{13}\text{C}$  NMR (125 MHz,  $\text{CDCl}_3$ )  $\delta$  206.78 (d,  $J = 19.9$  Hz), 144.25 (d,  $J = 3.8$  Hz), 120.78 (dd,  $J = 18.0, 2.0$  Hz), 96.85 (d,  $J = 190.0$  Hz), 40.68 (d,  $J = 21.4$  Hz), 39.99 (s), 27.80 (s), 26.98 (d,  $J = 1.8$  Hz), 22.52 (d,  $J = 8.7$  Hz), 19.38 (d,  $J = 2.3$  Hz).  $m/z$  HRMS (EI) found  $[\text{M}]^+$  170.1107,  $\text{C}_{10}\text{H}_{15}\text{FO}^+$  requires 170.1107. HPLC (Chiralpak IA column, 99.5:0.5 hexanes/ isopropanol, 1 ml/min;  $t_r = 13.4$  min (major), 15.6 min (minor); 85% ee.

(*R*)-2-fluoro-2-(phenylethynyl)cyclohexanone (**2p**)

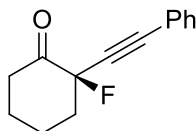

Reaction was carried out according to general procedure using **1p** (39.6 mg, 0.20 mmol) as substrate and **A12** (6.3 mg, 0.02 mmol) as amine catalyst. Purification by column chromatography (6: 4, Hexane : DCM) gave the title compound **2p** as an oil (18.6 mg, 0.0861 mmol, 43% based on ketone, 86% based on Selectfluor).  $^1\text{H}$  NMR (600 MHz,  $\text{CDCl}_3$ )  $\delta$  7.47 (d,  $J = 6.8$  Hz, 2H), 7.41 – 7.30 (m, 3H), 2.85 (td,  $J = 13.3, 6.0$  Hz, 1H), 2.63 – 2.47 (m, 2H), 2.16 – 2.04 (m, 3H), 2.04 – 1.95 (m, 2H), 1.78 – 1.67 (m, 1H).  $^{19}\text{F}$  NMR (376 MHz,  $\text{CDCl}_3$ )  $\delta$  -145.56 (s).  $^{13}\text{C}$  NMR (151 MHz,  $\text{CDCl}_3$ )  $\delta$  201.66 (d,  $J = 18.9$  Hz), 132.06 (d,  $J = 2.5$  Hz), 129.61 (s), 128.55 (s), 121.19 (d,  $J = 3.3$  Hz), 92.10 (d,  $J = 189.1$  Hz), 91.46 (d,  $J = 9.0$  Hz), 83.44 (d,  $J = 30.8$  Hz), 40.49 (d,  $J = 22.6$  Hz), 38.92 (s), 27.14 (s), 22.92 (d,  $J = 7.5$  Hz).  $m/z$  HRMS (EI) found  $[\text{M}]^+$  216.0954,  $\text{C}_{14}\text{H}_{13}\text{FO}^+$  requires 216.0950. HPLC (Chiralpak IC column, 95:5 hexanes/ isopropanol, 1 ml/min;  $t_r = 12.0$  min (major), 12.6 min (minor); 78% ee.

(*R*)-2-fluoro-2-(hex-1-yn-1-yl)cyclohexanone (**2q**)

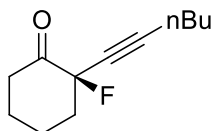

Reaction was carried out according to general procedure using **1q** (35.6 mg, 0.20 mmol) as substrate and **A12** (6.3 mg, 0.02 mmol) as amine catalyst. Purification by column chromatography (6: 4, Hexane : DCM) gave the title compound **2q** as an oil (15.1 mg, 0.077mmol, 39% based on ketone, 77% based on Selectfluor).  $^1\text{H}$  NMR (600 MHz,  $\text{CDCl}_3$ )  $\delta$  2.77 (td,  $J = 13.4, 6.0$  Hz, 1H), 2.49 (dt,  $J = 13.9, 4.2$  Hz, 1H), 2.37 (td,  $J = 8.2, 6.3, 3.4$  Hz, 1H), 2.28 (q,  $J = 6.8$  Hz, 2H), 2.06 – 1.94 (m, 2H), 1.94 – 1.87 (m, 2H), 1.71 – 1.60 (m, 1H), 1.56 – 1.47 (m, 2H), 1.44 – 1.35 (m, 2H), 0.91 (t,  $J = 7.4$  Hz, 3H).  $^{19}\text{F}$  NMR (376 MHz,  $\text{CDCl}_3$ )  $\delta$  -144.57 (s).  $^{13}\text{C}$  NMR (151 MHz,  $\text{CDCl}_3$ )  $\delta$  202.35 (d,  $J = 18.8$  Hz), 93.24 (d,  $J = 9.0$  Hz), 92.00 (d,  $J = 187.3$  Hz), 75.28 (d,  $J = 30.7$  Hz), 40.58 (d,  $J = 22.8$  Hz), 38.76 (s), 30.29 (d,  $J = 2.3$  Hz), 27.13 (s), 22.92 (d,  $J = 7.5$  Hz), 22.05 (s), 18.63 (d,  $J = 2.8$  Hz), 13.63 (s).  $m/z$  HRMS (EI) found  $[\text{M}]^+$  196.1265,  $\text{C}_{12}\text{H}_{17}\text{FO}^+$  requires 196.1263. HPLC (Chiralpak IA column, 99.9: 0.01 hexanes/isopropanol, 1 ml/min;  $t_r = 13.5$  min (major), 14.7 min (minor); 77% ee.

### Functionalization of product:

(*1R,2R*)-2-fluoro-1,2-diphenylcyclohexanol (**3a**)

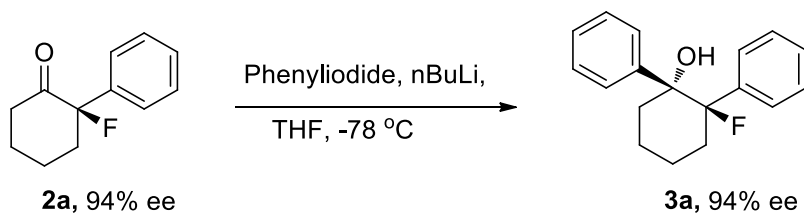

To a solution of phenyliodide (61  $\mu\text{L}$ , 0.547 mmol) in THF (2 mL) was added  $n\text{BuLi}$  (2.5 N solution in hexane, 219  $\mu\text{L}$ , 0.547 mmol) at  $-78$   $^\circ\text{C}$ . After stirring for 1 h at this temperature, a solution of **2a** (35 mg, 0.182 mmol) in THF (0.5 mL) was added to the mixture. After stirring for another 2 h at this temperature, the mixture was quenched by saturated  $\text{NH}_4\text{Cl}$  solution. The mixture was extracted with  $\text{Et}_2\text{O}$  for three times. The combined organic layer was then washed with brine, filtered, concentrated *in vacuo* to afford a residue, which was purified by column chromatography (7 :3, Hexane : DCM) to afford **3a** as a white solid (40 mg, 81%).  $^1\text{H}$  NMR (600 MHz,  $\text{CDCl}_3$ )  $\delta$  7.18 – 7.08 (m, 8H), 7.02 (dd,  $J = 7.5, 1.7$  Hz, 2H),

2.78 – 2.53 (m, 2H), 2.01 – 1.88 (m, 3H), 1.83 – 1.69 (m, 4H).  $^{19}\text{F}$  NMR (376 MHz,  $\text{CDCl}_3$ )  $\delta$  -161.94 (dd,  $J = 41.2, 7.2$  Hz).  $^{13}\text{C}$  NMR (151 MHz,  $\text{CDCl}_3$ )  $\delta$  143.82 (d,  $J = 1.4$  Hz), 140.93 (d,  $J = 21.9$  Hz), 127.32 (s), 127.30 (s), 127.19 (d,  $J = 1.7$  Hz), 127.04 (s), 126.44 (d,  $J = 3.0$  Hz), 126.01 (d,  $J = 10.0$  Hz), 97.83 (d,  $J = 180.2$  Hz), 75.90 (d,  $J = 29.5$  Hz), 35.51, 33.01 (d,  $J = 21.4$  Hz), 20.93 (d,  $J = 2.9$  Hz), 20.65 (s).  $m/z$  HRMS (EI) found  $[\text{M}]^+$  270.1416,  $\text{C}_{18}\text{H}_{19}\text{FO}^+$  requires 270.1420. HPLC (Chiralpak IA column, 99:1 hexanes/ isopropanol, 1 ml/min;  $t_r = 23.0$  min (minor), 25.8 min (major); 94% ee.

(1*S*,2*R*)-2-fluoro-2-phenylcyclohexanol (**3b**)

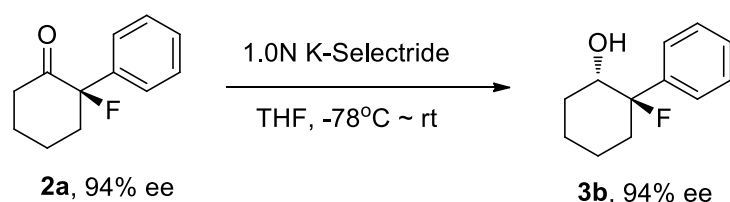

To a solution of **2a** (20 mg, 0.104 mmol) in THF (2 mL) was added K-Selectride (1.0 N solution in THF, 156  $\mu\text{L}$ , 0.156 mmol) at  $-78^\circ\text{C}$ . After slowly warming to rt and stirring overnight, the mixture was quenched with 1 N HCl solution. The mixture was extracted with  $\text{Et}_2\text{O}$  for three times. The combined organic layer was then washed with brine, filtered, concentrated *in vacuo* to afford a residue, which was purified by column chromatography (5 :5, Hexane : DCM) to afford **3b** as an oil (14.0 mg, 69%).  $^1\text{H}$  NMR (400 MHz,  $\text{CDCl}_3$ )  $\delta$  7.48 (d,  $J = 7.3$  Hz, 2H), 7.40 (t,  $J = 7.5$  Hz, 2H), 7.34 (t,  $J = 7.2$  Hz, 1H), 3.85 (s, 1H), 2.38 (dddd,  $J = 42.5, 14.0, 12.0, 4.8$  Hz, 1H), 2.10 – 1.98 (m, 1H), 1.97 – 1.80 (m, 2H), 1.80 – 1.61 (m, 3H), 1.59 – 1.49 (m, 1H).  $^{19}\text{F}$  NMR (376 MHz,  $\text{CDCl}_3$ )  $\delta$  -155.11 (d,  $J = 42.6$  Hz).  $^{13}\text{C}$  NMR (151 MHz,  $\text{CDCl}_3$ )  $\delta$  142.57 (d,  $J = 21.7$  Hz), 128.55 (s), 128.27 (d,  $J = 1.9$  Hz), 125.60 (d,  $J = 8.4$  Hz), 95.94 (d,  $J = 174.1$  Hz), 71.46 (d,  $J = 34.9$  Hz), 29.66 (d,  $J = 20.9$  Hz), 28.94 (s), 21.07 (d,  $J = 2.8$  Hz), 18.65 (s).  $m/z$  HRMS (EI) found  $[\text{M}]^+$  194.1112,  $\text{C}_{12}\text{H}_{15}\text{FO}^+$  requires 194.1110. HPLC (Chiralpak IA column, 98:2 hexanes/ isopropanol, 1 ml/min;  $t_r = 16.9$  min (major), 19.0 min (minor); 94% ee.

(*S,E*)-methyl 2-(2-fluoro-2-phenylcyclohexylidene)acetate (**3c**)

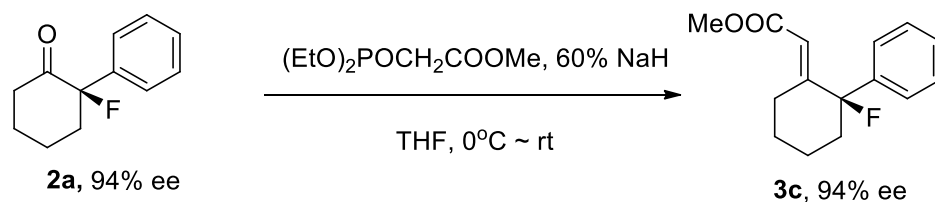

To a solution of  $(\text{EtO})_2\text{POCH}_2\text{COOMe}$  (43  $\mu\text{l}$ , 0.234 mmol) in THF was added NaH (60%, 13 mg, 0.234 mmol) at 0 °C. After stirring for 0.5 h at this temperature, a solution of **2a** (13.0 mg, 0.0678 mmol) in THF (0.5 mL) was added. After stirring for another 2 h, the mixture was quenched with saturated  $\text{NH}_4\text{Cl}$  solution. The mixture was extracted with  $\text{Et}_2\text{O}$  for three times. The combined organic layer was then washed with brine, filtered, concentrated *in vacuo* to afford a residue, which was purified by column chromatography (25 :1, Hexane : EA) to afford **3c** as an oil (15.0 mg, 89%).  $^1\text{H}$  NMR (600 MHz,  $\text{CDCl}_3$ )  $\delta$  7.44 (d,  $J$  = 8.2 Hz, 2H), 7.40 (t,  $J$  = 7.5 Hz, 2H), 7.38 – 7.32 (m, 1H), 5.87 (s, 1H), 3.71 (s, 3H), 3.39 (ddt,  $J$  = 13.3, 6.3, 3.0 Hz, 1H), 2.63 (dddd,  $J$  = 17.2, 13.5, 6.9, 3.6 Hz, 1H), 2.46 (ddd,  $J$  = 13.9, 9.2, 4.6 Hz, 1H), 2.10 (dtd,  $J$  = 14.0, 10.0, 4.1 Hz, 1H), 1.97 – 1.89 (m, 1H), 1.77 – 1.58 (m, 3H).  $^{19}\text{F}$  NMR (376 MHz,  $\text{CDCl}_3$ )  $\delta$  -129.21 (s).  $^{13}\text{C}$  NMR (151 MHz,  $\text{CDCl}_3$ )  $\delta$  167.23 (s), 160.68 (d,  $J$  = 17.6 Hz), 138.91 (d,  $J$  = 22.0 Hz), 128.88 (d,  $J$  = 2.9 Hz), 128.75 (d,  $J$  = 1.2 Hz), 126.87 (d,  $J$  = 5.7 Hz), 114.66 (d,  $J$  = 12.1 Hz), 97.25 (d,  $J$  = 178.7 Hz), 51.36 (s), 37.72 (d,  $J$  = 23.0 Hz), 27.64 (d,  $J$  = 1.4 Hz), 27.46 (s), 22.94 (d,  $J$  = 7.9 Hz).  $m/z$  HRMS (EI) found  $[\text{M}]^+$  248.1220,  $\text{C}_{15}\text{H}_{17}\text{FO}_2^+$  requires 248.1213. HPLC (Chiralpak IC column, 98:2 hexanes/ isopropanol, 1 ml/min;  $t_r$  = 17.4 min (minor), 18.5 min (major); 94% ee.

**(R)-2-([1,1'-biphenyl]-3-yl)-2-fluorocyclohexanone (3d)**

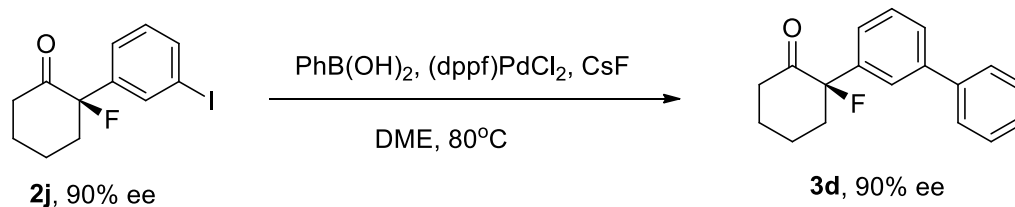

To a 10 ml flask was added **2j** (53 mg, 0.167 mmol),  $\text{PhB}(\text{OH})_2$  (41 mg, 0.333 mmol), (dppf) $\text{PdCl}_2$  (18 mg, 0.025 mmol) and CsF (152 mg, 1.00 mmol). After degassed with  $\text{N}_2$  for three times, DME (3 mL) was added and the mixture was warmed to 80 °C. After stirring overnight at this temperature, the mixture was cooled to rt and filtered. The filtrate was then

concentrated *in vacuo* to afford a residue, which was purified by column chromatography (7 : 3, Hexane : DCM) to afford **3d** as an oil (33 mg, 74%). <sup>1</sup>H NMR (400 MHz, CDCl<sub>3</sub>) δ 7.64 – 7.56 (m, 4H), 7.54 – 7.42 (m, 3H), 7.41 – 7.33 (m, 2H), 2.87 – 2.73 (m, 1H), 2.68 (dddd, *J* = 18.9, 11.8, 7.1, 4.0 Hz, 1H), 2.45 (ddd, *J* = 13.7, 8.1, 5.8 Hz, 1H), 2.35 (tdd, *J* = 13.2, 8.5, 4.1 Hz, 1H), 2.16 – 2.04 (m, 1H), 2.04 – 1.91 (m, 2H), 1.86 (ddt, *J* = 13.0, 8.7, 4.2 Hz, 1H). <sup>19</sup>F NMR (376 MHz, CDCl<sub>3</sub>) δ -141.35 (dd, *J* = 16.7, 9.4 Hz). <sup>13</sup>C NMR (151 MHz, CDCl<sub>3</sub>) δ 206.26 (d, *J* = 22.5 Hz), 141.86 (s), 140.84 (s), 136.83 (d, *J* = 21.6 Hz), 129.16 (s), 128.94 (s), 127.98 (d, *J* = 2.4 Hz), 127.70 (s), 127.40 (s), 125.33 (d, *J* = 6.5 Hz), 125.31 (d, *J* = 6.2 Hz), 98.41 (d, *J* = 184.1 Hz), 40.05 (s), 38.24 (d, *J* = 22.7 Hz), 27.68 (s), 22.32 (d, *J* = 6.7 Hz). m/z HRMS (EI) found [M]<sup>+</sup> 268.1264, C<sub>18</sub>H<sub>17</sub>FO<sup>+</sup> requires 268.1263. HPLC (Chiralpak IC column, 96:4 hexanes/ isopropanol, 1 ml/min; tr= 11.3 min (minor), 12.0 min (major); 90% ee.

#### References:

- 1) a) Hamilton, G. L.; Kang, E. J.; Mba, M.; Toste, F. D. *Science* **2007**, *317*, 496. b) Rauniyar, V.; Lackner, A. D.; Hamilton, G. L.; Toste, F. D. *Science* **2011**, *334*, 1681. c) Wang, Y.-M.; Wu, J.; Hoong, C.; Rauniyar, V.; Toste, F. D. *J. Am. Chem. Soc.* **2012**, *134*, 12928. d) Rauniyar, V.; Wang, Z. J.; Burks, H. E.; Toste, F. D. *J. Am. Chem. Soc.* **2011**, *133*, 8486. e) Akiyama, T.; Morita, H.; Fuchibe, K. *J. Am. Chem. Soc.* **2006**, *128*, 13070.
- 2) McCooy, S. H.; Cannon, S. J. *Org. Lett.* **2007**, *9*, 599.
- 3) Cho, J. H.; Kim, B. M. *Tetrahedron Letters* **2002**, *43*, 1273.
- 4) Ross, A. J.; Lang, H. L.; Jackson, R. F. W. *J. Org. Chem.* **2010**, *75*, 245.
- 5) Fox, J. M.; Huang, X.; Chieffi, A.; Buchwald, S. L. *J. Am. Chem. Soc.* **2000**, *122*, 1360.
- 6) Cheon, C. H.; Kanno, O.; Toste, F. D. *J. Am. Chem. Soc.* **2011**, *133*, 13248.
- 7) Xie, J.-H.; Liu, S.; Huo, X.-H.; Cheng, X.; Duan, H.-F.; Fan, B.-M.; Wang, L.-X.; Zhou, Q.-L. *J. Org. Chem.* **2005**, *70*, 2967.
- 8) Wang, X.; Pei, T.; Han, X.; Windenhofer, R. A. *Org. Lett.* **2003**, *5*, 2699.
- 9) Cheng, L.-J.; Xie, J.-H.; Wang, L.-X.; Zhou, Q.-L. *Adv. Synth. Catal.* **2012**, *354*, 1105.
- 10) Rosiak, A.; Frey, W.; Christoffers, J. *Eur. J. Org. Chem.* **2006**, 4044.
- 11) Rosiak, A.; Hoenke, C.; Christoffer, J. *Eur. J. Org. Chem.* **2007**, 4376.

## X-Ray Crystal Structure Data for 2j

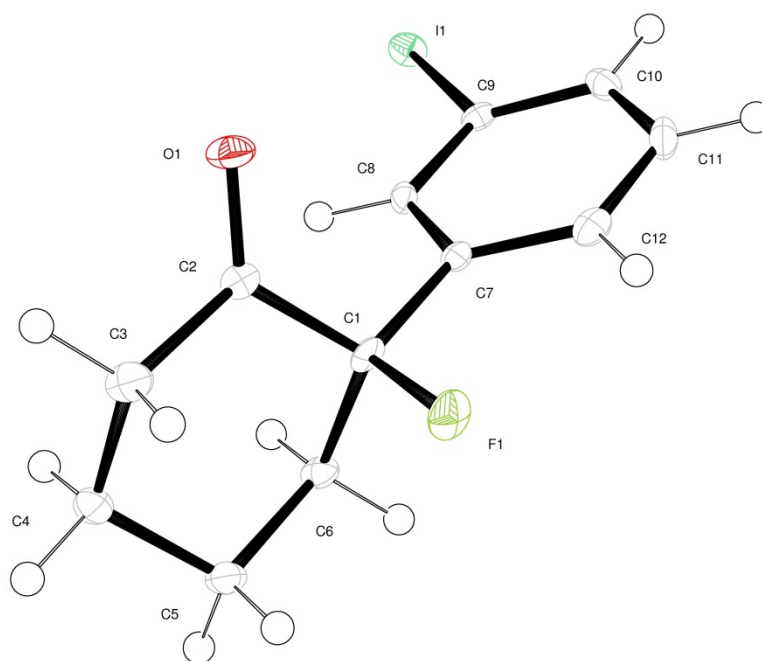

A colorless needle 0.060 x 0.030 x 0.010 mm in size was mounted on a Cryoloop with Paratone oil. Data were collected in a nitrogen gas stream at 100(2) K using phi and omega scans. Crystal-



to-detector distance was 60 mm and exposure time was 5 seconds per frame using a scan width of 1.0°. Data collection was 99.7% complete to 25.000° in  $\theta$ . A total of 16326 reflections were collected covering the indices,  $-7 \leq h \leq 7$ ,  $-11 \leq k \leq 11$ ,  $-22 \leq l \leq 21$ . 2012 reflections were found to be symmetry independent, with an  $R_{\text{int}}$  of 0.0266. Indexing and unit cell refinement indicated a primitive, orthorhombic lattice. The space group was found to be P 21 21 21 (No. 19). The data were integrated using the Bruker SAINT software program and scaled using the SADABS software program. Solution by iterative methods (SHELXT) produced a complete heavy-atom phasing model consistent with the proposed structure. All non-hydrogen atoms were refined anisotropically by full-matrix least-squares (SHELXL-2013). All hydrogen atoms were placed using a riding model. Their positions were constrained relative to their parent atom using the appropriate HFIX command in SHELXL-2013.

Table 1. Crystal data and structure refinement for *toste92*.

|                        |                                       |                       |
|------------------------|---------------------------------------|-----------------------|
| X-ray ID               | toste92                               |                       |
| Sample/notebook ID     | YXY3-45-1                             |                       |
| Empirical formula      | C <sub>12</sub> H <sub>12</sub> F I O |                       |
| Formula weight         | 318.12                                |                       |
| Temperature            | 100(2) K                              |                       |
| Wavelength             | 0.71073 Å                             |                       |
| Crystal system         | Orthorhombic                          |                       |
| Space group            | P 21 21 21                            |                       |
| Unit cell dimensions   | a = 6.1659(2) Å                       | $\alpha = 90^\circ$ . |
|                        | b = 9.8138(3) Å                       | $\beta = 90^\circ$ .  |
|                        | c = 18.5821(5) Å                      | $\gamma = 90^\circ$ . |
| Volume                 | 1124.42(6) Å <sup>3</sup>             |                       |
| Z                      | 4                                     |                       |
| Density (calculated)   | 1.879 Mg/m <sup>3</sup>               |                       |
| Absorption coefficient | 2.832 mm <sup>-1</sup>                |                       |
| F(000)                 | 616                                   |                       |
| Crystal size           | 0.060 x 0.030 x 0.010 mm <sup>3</sup> |                       |

|                                   |                                             |
|-----------------------------------|---------------------------------------------|
| Crystal color/habit               | colorless needle                            |
| Theta range for data collection   | 2.192 to 25.344°.                           |
| Index ranges                      | -7<=h<=7, -11<=k<=11, -22<=l<=21            |
| Reflections collected             | 16326                                       |
| Independent reflections           | 2012 [R(int) = 0.0266]                      |
| Completeness to theta = 25.000°   | 99.7 %                                      |
| Absorption correction             | Semi-empirical from equivalents             |
| Max. and min. transmission        | 0.862 and 0.740                             |
| Refinement method                 | Full-matrix least-squares on F <sup>2</sup> |
| Data / restraints / parameters    | 2012 / 0 / 136                              |
| Goodness-of-fit on F <sup>2</sup> | 1.102                                       |
| Final R indices [I>2sigma(I)]     | R1 = 0.0145, wR2 = 0.0276                   |
| R indices (all data)              | R1 = 0.0153, wR2 = 0.0278                   |
| Absolute structure parameter      | -0.034(9)                                   |
| Extinction coefficient            | n/a                                         |
| Largest diff. peak and hole       | 0.294 and -0.276 e.Å <sup>-3</sup>          |

Table 2. Atomic coordinates ( $\times 10^4$ ) and equivalent isotropic displacement parameters ( $\text{Å}^2 \times 10^3$ ) for *toste92*.  $U(\text{eq})$  is defined as one third of the trace of the orthogonalized  $U^{ij}$  tensor.

|       | x       | y       | z        | U(eq) |
|-------|---------|---------|----------|-------|
| C(1)  | 6512(5) | 5056(3) | 9825(2)  | 12(1) |
| C(2)  | 6562(5) | 6292(3) | 10345(2) | 11(1) |
| C(3)  | 5645(6) | 6026(3) | 11081(2) | 18(1) |
| C(4)  | 3468(6) | 5282(3) | 11062(2) | 15(1) |
| C(5)  | 3595(5) | 4000(3) | 10606(2) | 15(1) |
| C(6)  | 4325(5) | 4349(3) | 9841(2)  | 13(1) |
| C(7)  | 7272(5) | 5405(3) | 9075(2)  | 10(1) |
| C(8)  | 6000(5) | 6261(3) | 8646(2)  | 11(1) |
| C(9)  | 6696(5) | 6595(3) | 7959(2)  | 11(1) |
| C(10) | 8665(5) | 6118(3) | 7692(2)  | 14(1) |
| C(11) | 9903(5) | 5261(3) | 8116(2)  | 16(1) |
| C(12) | 9216(5) | 4900(3) | 8801(2)  | 14(1) |
| O(1)  | 7351(3) | 7361(2) | 10166(1) | 17(1) |
| F(1)  | 8039(3) | 4148(2) | 10141(1) | 19(1) |

I(1) 4737(1) 7814(1) 7297(1) 16(1)

Table 3. Bond lengths [Å] and angles [°] for *toste92*.

|                  |          |                  |          |
|------------------|----------|------------------|----------|
| C(1)-F(1)        | 1.423(4) | C(5)-H(5B)       | 0.9900   |
| C(1)-C(7)        | 1.509(4) | C(6)-H(6A)       | 0.9900   |
| C(1)-C(6)        | 1.516(4) | C(6)-H(6B)       | 0.9900   |
| C(1)-C(2)        | 1.551(4) | C(7)-C(12)       | 1.393(4) |
| C(2)-O(1)        | 1.204(4) | C(7)-C(8)        | 1.399(4) |
| C(2)-C(3)        | 1.501(4) | C(8)-C(9)        | 1.386(4) |
| C(3)-C(4)        | 1.529(5) | C(8)-H(8)        | 0.9500   |
| C(3)-H(3A)       | 0.9900   | C(9)-C(10)       | 1.393(4) |
| C(3)-H(3B)       | 0.9900   | C(9)-I(1)        | 2.098(3) |
| C(4)-C(5)        | 1.519(4) | C(10)-C(11)      | 1.383(4) |
| C(4)-H(4A)       | 0.9900   | C(10)-H(10)      | 0.9500   |
| C(4)-H(4B)       | 0.9900   | C(11)-C(12)      | 1.387(4) |
| C(5)-C(6)        | 1.531(4) | C(11)-H(11)      | 0.9500   |
| C(5)-H(5A)       | 0.9900   | C(12)-H(12)      | 0.9500   |
| F(1)-C(1)-C(7)   | 108.5(3) | C(5)-C(4)-H(4A)  | 109.4    |
| F(1)-C(1)-C(6)   | 107.1(2) | C(3)-C(4)-H(4A)  | 109.4    |
| C(7)-C(1)-C(6)   | 113.4(3) | C(5)-C(4)-H(4B)  | 109.4    |
| F(1)-C(1)-C(2)   | 102.7(2) | C(3)-C(4)-H(4B)  | 109.4    |
| C(7)-C(1)-C(2)   | 113.0(2) | H(4A)-C(4)-H(4B) | 108.0    |
| C(6)-C(1)-C(2)   | 111.3(3) | C(4)-C(5)-C(6)   | 110.3(2) |
| O(1)-C(2)-C(3)   | 123.7(3) | C(4)-C(5)-H(5A)  | 109.6    |
| O(1)-C(2)-C(1)   | 121.2(3) | C(6)-C(5)-H(5A)  | 109.6    |
| C(3)-C(2)-C(1)   | 115.1(3) | C(4)-C(5)-H(5B)  | 109.6    |
| C(2)-C(3)-C(4)   | 113.1(3) | C(6)-C(5)-H(5B)  | 109.6    |
| C(2)-C(3)-H(3A)  | 109.0    | H(5A)-C(5)-H(5B) | 108.1    |
| C(4)-C(3)-H(3A)  | 109.0    | C(1)-C(6)-C(5)   | 112.4(2) |
| C(2)-C(3)-H(3B)  | 109.0    | C(1)-C(6)-H(6A)  | 109.1    |
| C(4)-C(3)-H(3B)  | 109.0    | C(5)-C(6)-H(6A)  | 109.1    |
| H(3A)-C(3)-H(3B) | 107.8    | C(1)-C(6)-H(6B)  | 109.1    |
| C(5)-C(4)-C(3)   | 111.3(3) | C(5)-C(6)-H(6B)  | 109.1    |

|                   |          |
|-------------------|----------|
| H(6A)-C(6)-H(6B)  | 107.8    |
| C(12)-C(7)-C(8)   | 119.2(3) |
| C(12)-C(7)-C(1)   | 121.6(3) |
| C(8)-C(7)-C(1)    | 119.2(3) |
| C(9)-C(8)-C(7)    | 119.6(3) |
| C(9)-C(8)-H(8)    | 120.2    |
| C(7)-C(8)-H(8)    | 120.2    |
| C(8)-C(9)-C(10)   | 121.2(3) |
| C(8)-C(9)-I(1)    | 119.8(2) |
| C(10)-C(9)-I(1)   | 119.0(2) |
| C(11)-C(10)-C(9)  | 118.9(3) |
| C(11)-C(10)-H(10) | 120.6    |
| C(9)-C(10)-H(10)  | 120.6    |
| C(10)-C(11)-C(12) | 120.6(3) |
| C(10)-C(11)-H(11) | 119.7    |
| C(12)-C(11)-H(11) | 119.7    |
| C(11)-C(12)-C(7)  | 120.5(3) |
| C(11)-C(12)-H(12) | 119.8    |
| C(7)-C(12)-H(12)  | 119.8    |

---

Symmetry transformations used to generate equivalent atoms:

Table 4. Anisotropic displacement parameters ( $\text{\AA}^2 \times 10^3$ ) for *toste92*. The anisotropic displacement factor exponent takes the form:  $-2\pi^2 [ h^2 a^{*2} U^{11} + \dots + 2 h k a^* b^* U^{12} ]$

---

|       | U <sup>11</sup> | U <sup>22</sup> | U <sup>33</sup> | U <sup>23</sup> | U <sup>13</sup> | U <sup>12</sup> |
|-------|-----------------|-----------------|-----------------|-----------------|-----------------|-----------------|
| C(1)  | 16(2)           | 7(2)            | 11(2)           | 3(1)            | -2(1)           | 6(1)            |
| C(2)  | 9(2)            | 11(2)           | 12(2)           | 0(1)            | -5(1)           | 0(1)            |
| C(3)  | 28(2)           | 15(2)           | 10(2)           | 0(1)            | -2(2)           | -4(2)           |
| C(4)  | 20(2)           | 14(2)           | 10(2)           | 2(1)            | 2(1)            | -1(2)           |
| C(5)  | 17(2)           | 11(2)           | 16(2)           | 2(1)            | 1(2)            | -1(1)           |
| C(6)  | 17(2)           | 10(2)           | 11(2)           | -1(1)           | -1(1)           | -3(1)           |
| C(7)  | 12(2)           | 8(2)            | 10(2)           | -3(1)           | 0(1)            | -2(1)           |
| C(8)  | 10(2)           | 10(2)           | 13(2)           | -4(1)           | 1(1)            | 0(1)            |
| C(9)  | 12(2)           | 8(1)            | 12(2)           | -1(1)           | -4(1)           | -2(1)           |
| C(10) | 16(2)           | 16(2)           | 11(2)           | -2(2)           | 3(2)            | -5(1)           |
| C(11) | 11(2)           | 16(2)           | 20(2)           | -7(1)           | 2(2)            | 2(2)            |
| C(12) | 14(2)           | 12(2)           | 16(2)           | -3(1)           | -5(1)           | -1(1)           |
| O(1)  | 22(1)           | 13(1)           | 16(1)           | 0(1)            | -1(1)           | -7(1)           |
| F(1)  | 20(1)           | 17(1)           | 18(1)           | 4(1)            | -2(1)           | 9(1)            |
| I(1)  | 16(1)           | 17(1)           | 13(1)           | 5(1)            | -2(1)           | 0(1)            |

---

Table 5. Hydrogen coordinates ( $\times 10^4$ ) and isotropic displacement parameters ( $\text{\AA}^2 \times 10^{-3}$ ) for *toste92*.

---

|       | x    | y    | z     | U(eq) |
|-------|------|------|-------|-------|
| H(3A) | 5458 | 6906 | 11334 | 21    |
| H(3B) | 6695 | 5474 | 11359 | 21    |
| H(4A) | 3035 | 5037 | 11558 | 18    |
| H(4B) | 2345 | 5896 | 10862 | 18    |
| H(5A) | 2155 | 3555 | 10591 | 18    |

|       |       |      |       |    |
|-------|-------|------|-------|----|
| H(5B) | 4636  | 3353 | 10826 | 18 |
| H(6A) | 4410  | 3501 | 9554  | 15 |
| H(6B) | 3229  | 4949 | 9614  | 15 |
| H(8)  | 4668  | 6611 | 8825  | 13 |
| H(10) | 9149  | 6377 | 7226  | 17 |
| H(11) | 11238 | 4916 | 7937  | 19 |
| H(12) | 10076 | 4304 | 9085  | 17 |

---

**(R)-2-fluoro-2-phenylcyclohexanone (2a)**

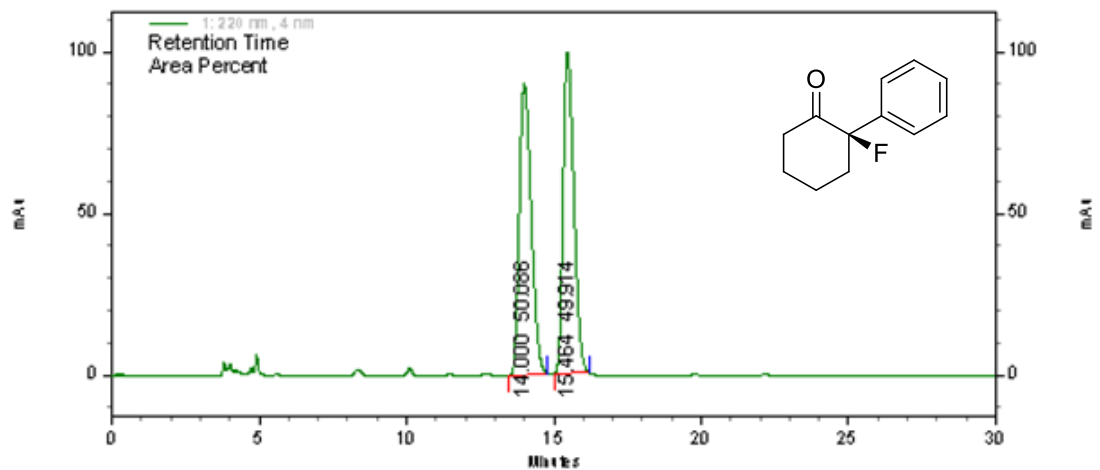

1: 220 nm, 4 nm

Results

| Pk # | Retention Time | Area Percent | Lambda Max |
|------|----------------|--------------|------------|
| 1    | 14.000         | 50.086       | 207        |
| 2    | 15.464         | 49.914       | 207        |

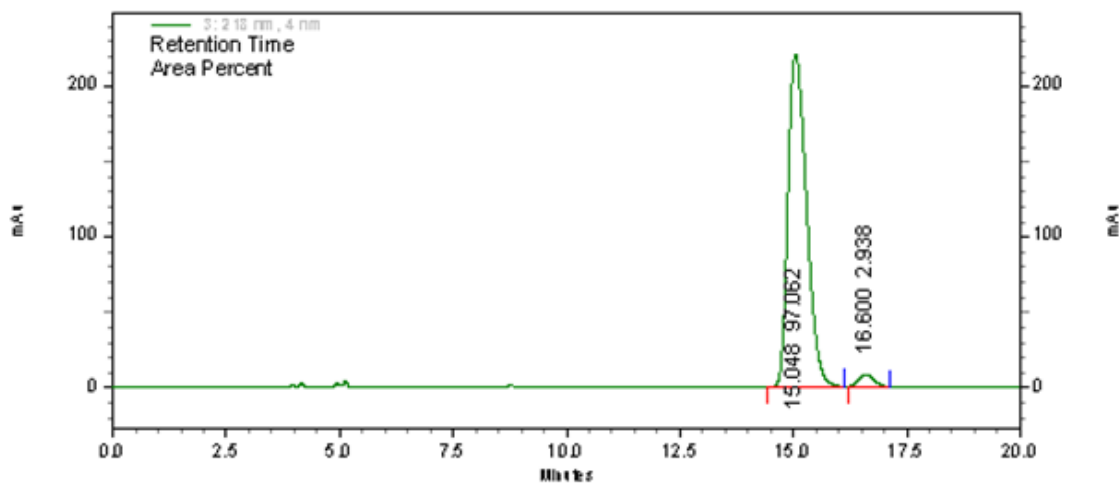

3: 218 nm, 4 nm

Results

| Pk # | Retention Time | Area Percent | Lambda Max |
|------|----------------|--------------|------------|
| 1    | 15.048         | 97.062       | 257        |
| 2    | 16.600         | 2.938        | 209        |

**(R)-2-fluoro-2-(naphthalen-2-yl)cyclohexanone (2b)**

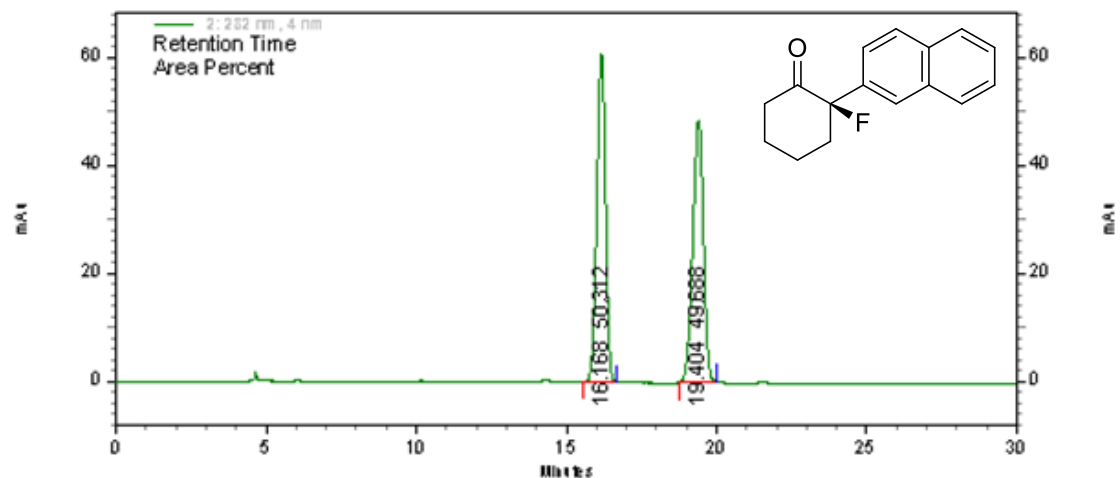

2: 282 nm, 4 nm

Results

| Pk # | Retention Time | Area Percent | Lambda Max |
|------|----------------|--------------|------------|
| 1    | 16.168         | 50.312       | 196        |
| 2    | 19.404         | 49.688       | 222        |

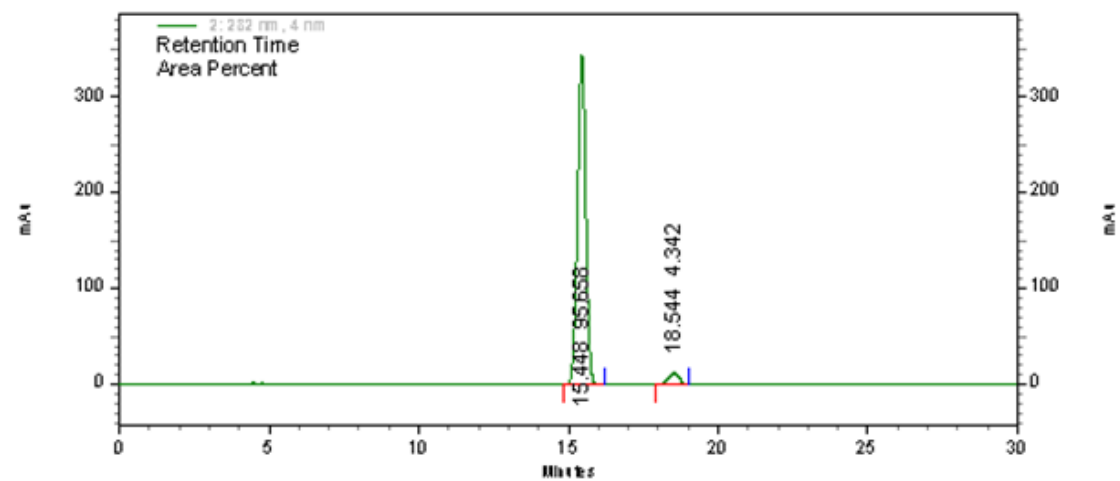

2: 282 nm, 4 nm

Results

| Pk # | Retention Time | Area Percent | Lambda Max |
|------|----------------|--------------|------------|
| 1    | 15.448         | 95.658       | 213        |
| 2    | 18.544         | 4.342        | 222        |



**(R)-2-fluoro-2-(p-tolyl)cyclohexanone (2c)**

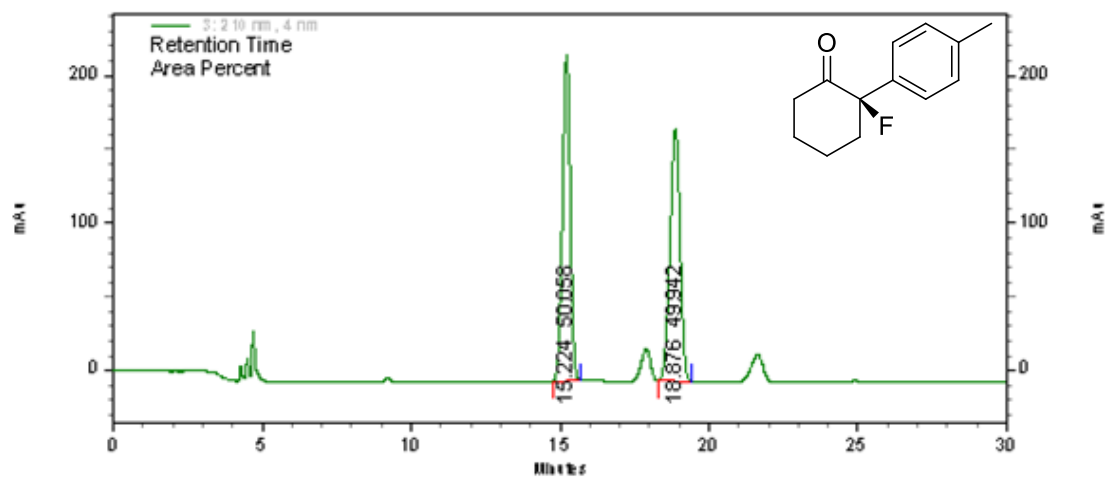

3: 210 nm, 4 nm

Results

| Pk # | Retention Time | Area Percent | Lambda Max |
|------|----------------|--------------|------------|
| 1    | 15.224         | 50.058       | 260        |
| 2    | 18.876         | 49.942       | 212        |

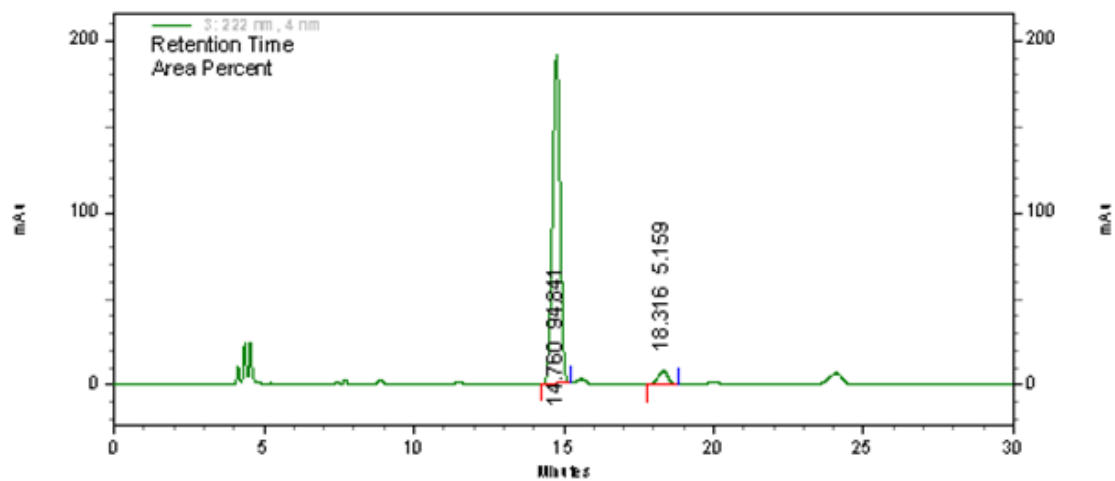

3: 222 nm, 4 nm

Results

| Pk # | Retention Time | Area Percent | Lambda Max |
|------|----------------|--------------|------------|
| 1    | 14.760         | 94.841       | 643        |
| 2    | 18.316         | 5.159        | 643        |

**(R)-2-(4-chlorophenyl)-2-fluorocyclohexanone (2d)**

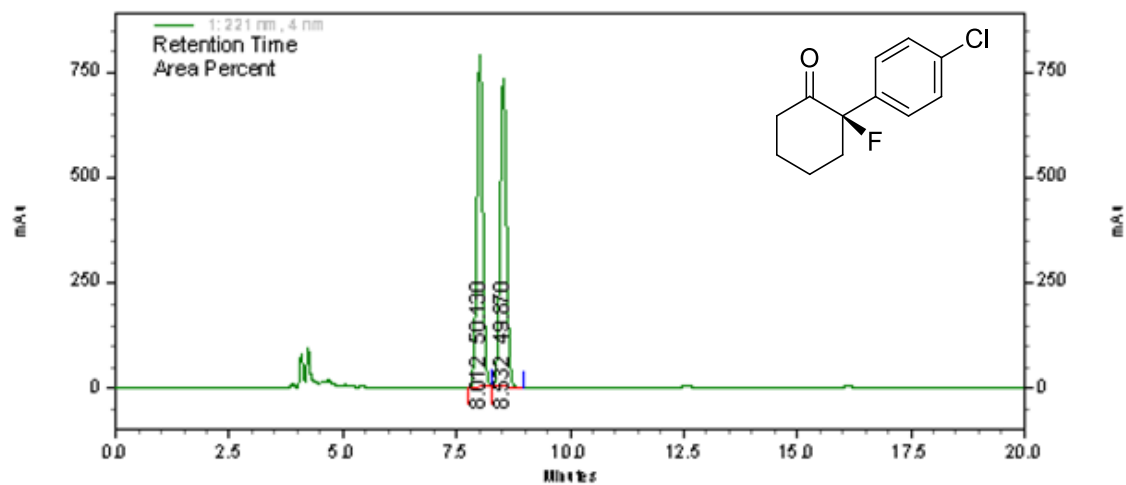

1: 221 nm, 4 nm

Results

| Pk # | Retention Time | Area Percent | Lambda Max |
|------|----------------|--------------|------------|
| 1    | 8.012          | 50.130       | 196        |
| 2    | 8.532          | 49.870       | 194        |

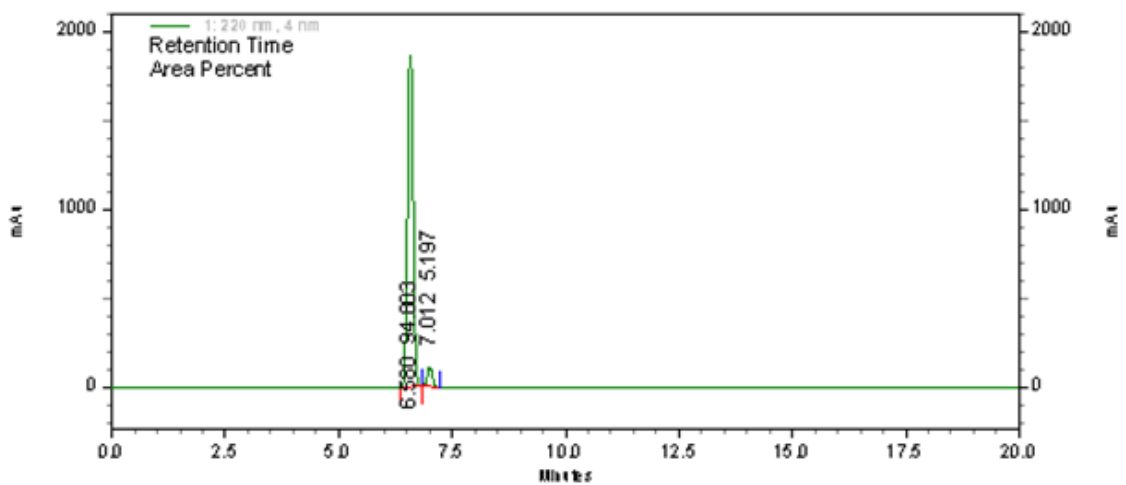

1: 220 nm, 4 nm

Results

| Pk # | Retention Time | Area Percent | Lambda Max |
|------|----------------|--------------|------------|
| 1    | 6.580          | 94.803       | 205        |
| 2    | 7.012          | 5.197        | 220        |

**(R)-2-(4-bromophenyl)-2-fluorocyclohexanone (2e)**

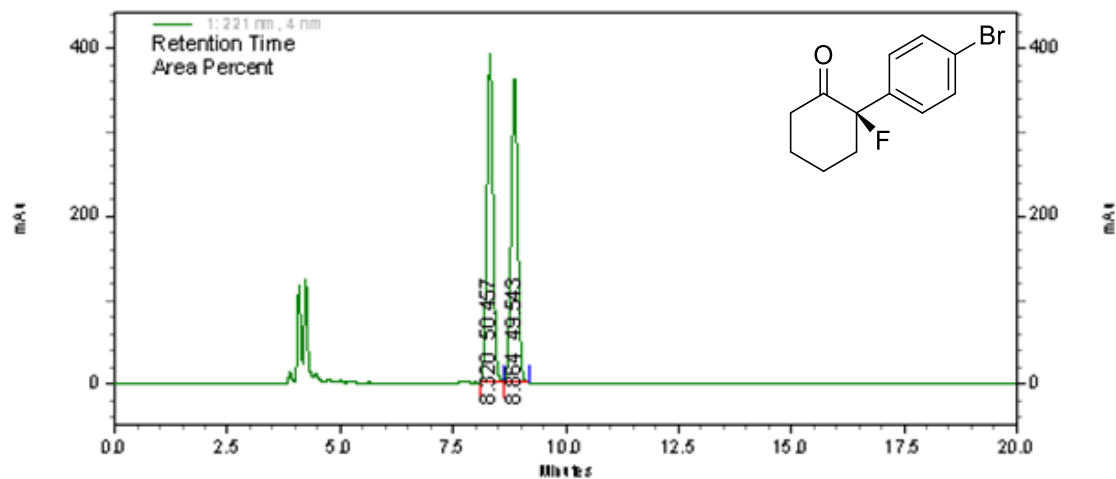

1: 221 nm, 4 nm

Results

| Pk # | Retention Time | Area Percent | Lambda Max |
|------|----------------|--------------|------------|
| 1    | 8.320          | 50.457       | 221        |
| 2    | 8.864          | 49.543       | 221        |

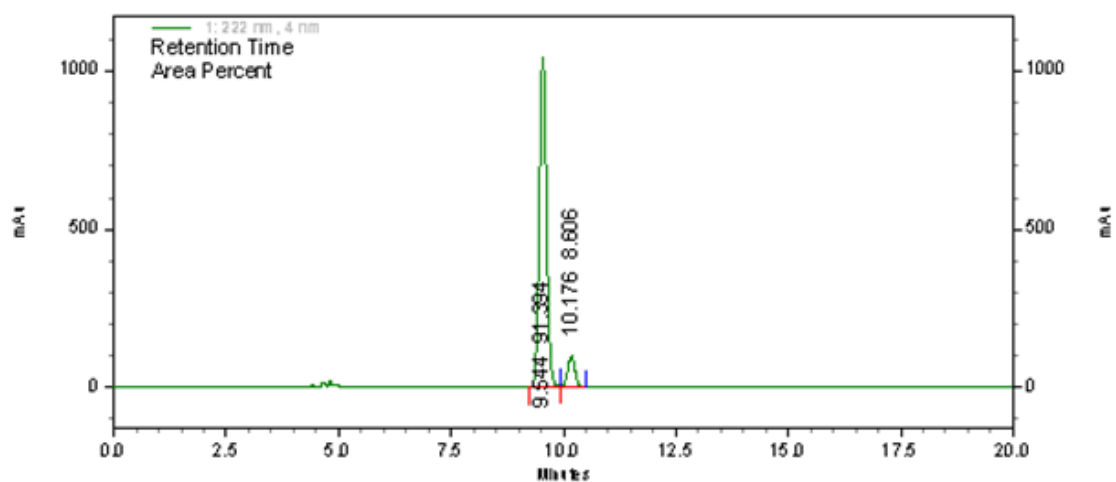

1: 222 nm, 4 nm

Results

| Pk # | Retention Time | Area Percent | Lambda Max |
|------|----------------|--------------|------------|
| 1    | 9.544          | 91.394       | 199        |
| 2    | 10.176         | 8.606        | 201        |

**(R)-2-fluoro-2-(m-tolyl)cyclohexanone (2f)**

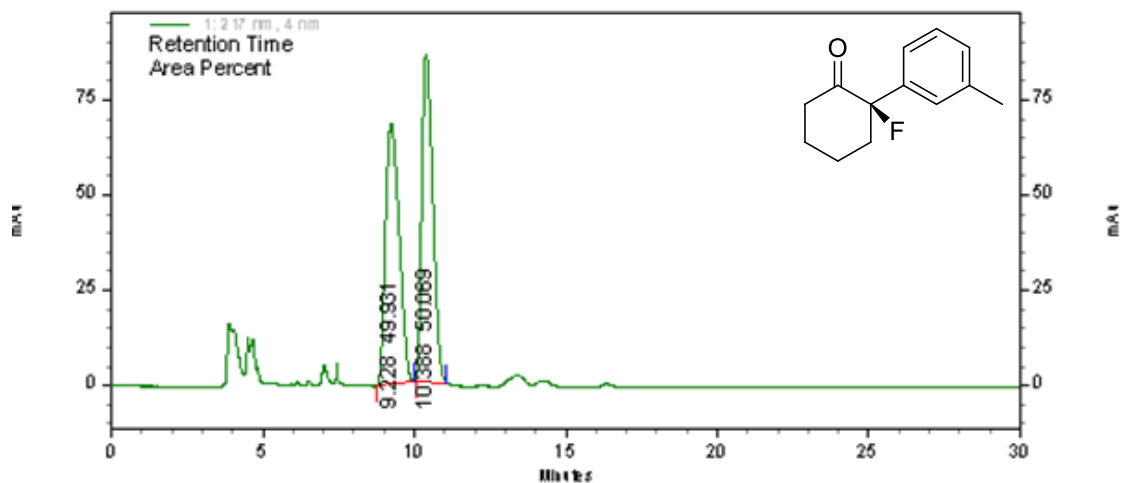

1: 217 nm, 4 nm

Results

| Pk # | Retention Time | Area Percent | Lambda Max |
|------|----------------|--------------|------------|
| 1    | 9.228          | 49.931       | 673        |
| 2    | 10.388         | 50.069       | 673        |

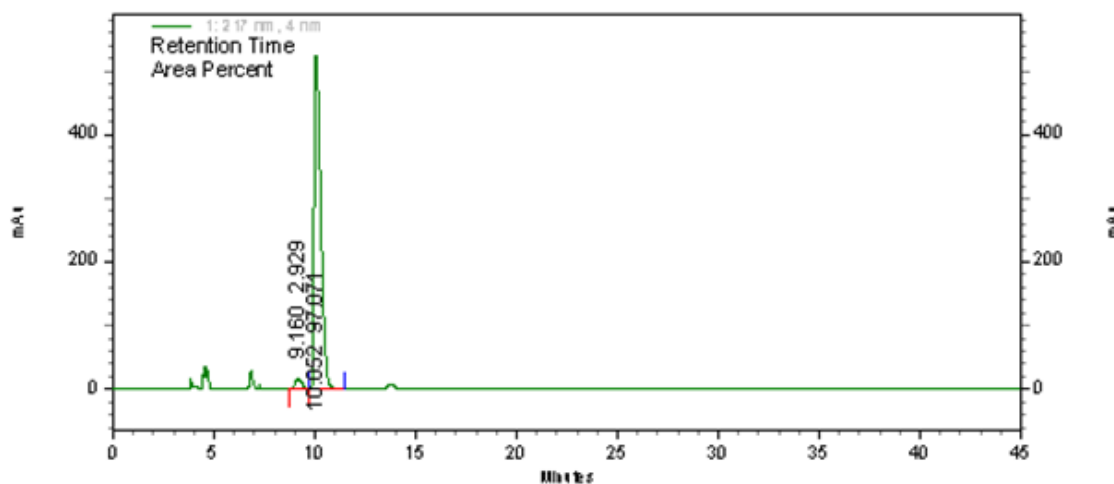

1: 217 nm, 4 nm

Results

| Pk # | Retention Time | Area Percent | Lambda Max |
|------|----------------|--------------|------------|
| 1    | 9.160          | 2.929        | 211        |
| 2    | 10.052         | 97.071       | 190        |

**(R)-2-(3-bromophenyl)-2-fluorocyclohexanone (2g)**

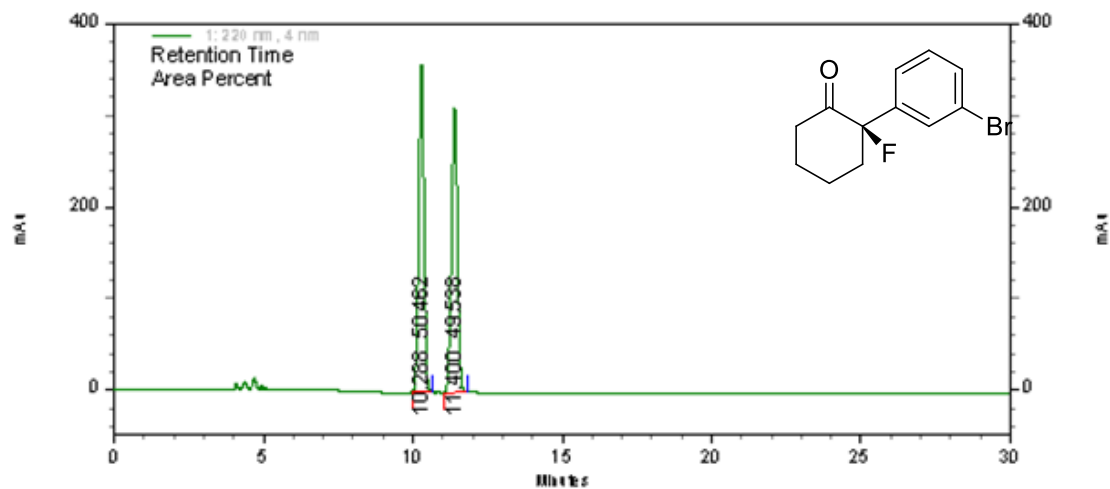

1: 220 nm, 4 nm

Results

| Pk # | Retention Time | Area Percent | Lambda Max |
|------|----------------|--------------|------------|
| 1    | 10.288         | 50.462       | 191        |
| 2    | 11.400         | 49.538       | 202        |

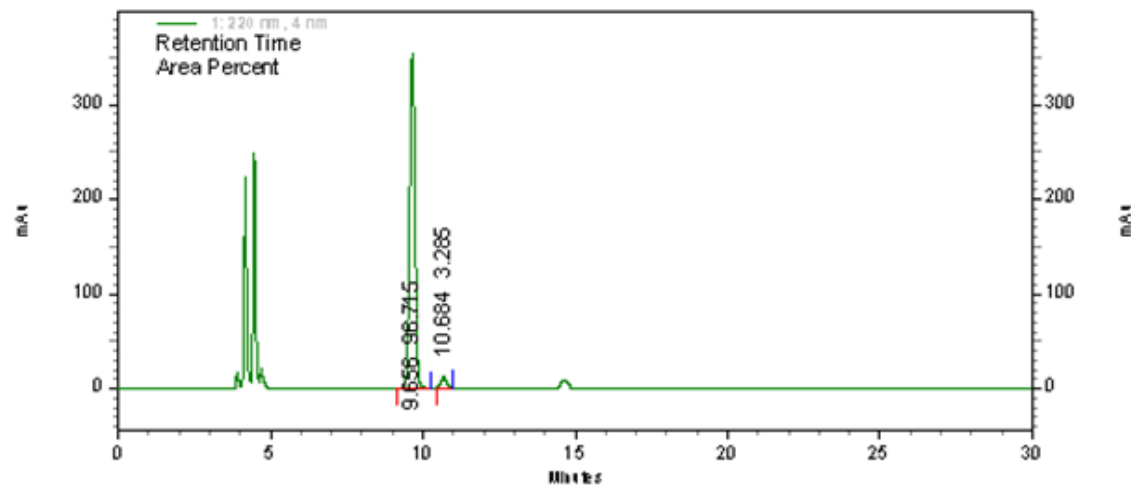

1: 220 nm, 4 nm

Results

| Pk # | Retention Time | Area Percent | Lambda Max |
|------|----------------|--------------|------------|
| 1    | 9.656          | 96.715       | 191        |
| 2    | 10.684         | 3.285        | 204        |

**(R)-2-fluoro-2-(3-methoxyphenyl)cyclohexanone (2h)**

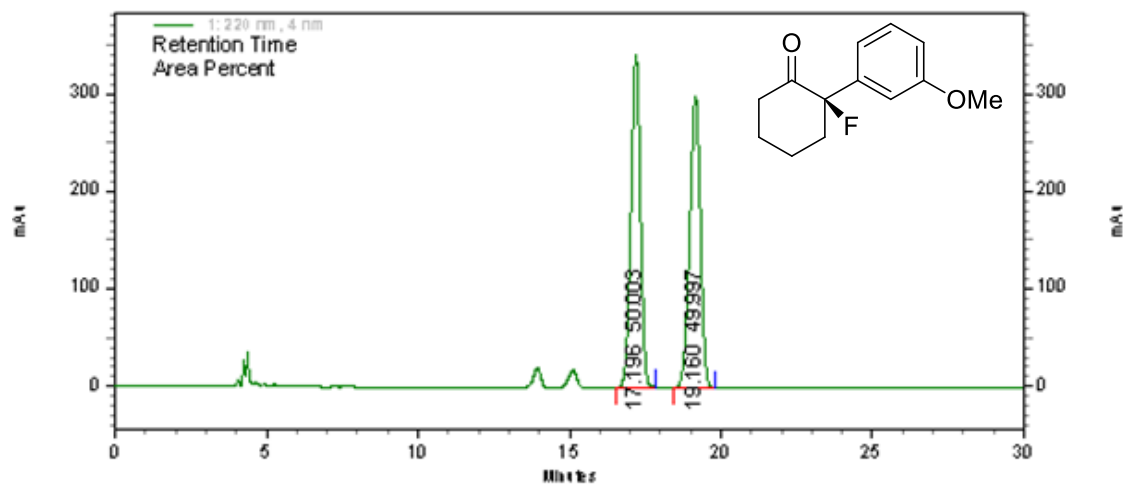

1: 220 nm, 4 nm

Results

| Pk # | Retention Time | Area Percent | Lambda Max |
|------|----------------|--------------|------------|
| 1    | 17.196         | 50.003       | 204        |
| 2    | 19.160         | 49.997       | 204        |

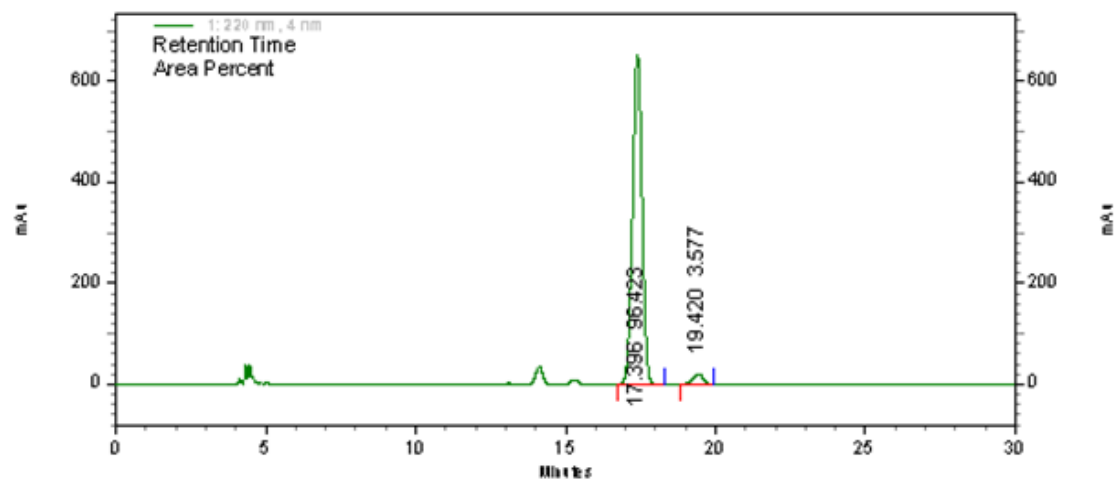

1: 220 nm, 4 nm

Results

| Pk # | Retention Time | Area Percent | Lambda Max |
|------|----------------|--------------|------------|
| 1    | 17.396         | 96.423       | 195        |
| 2    | 19.420         | 3.577        | 204        |

**(R)-2-fluoro-2-(furan-3-yl)cyclohexanone (2i)**

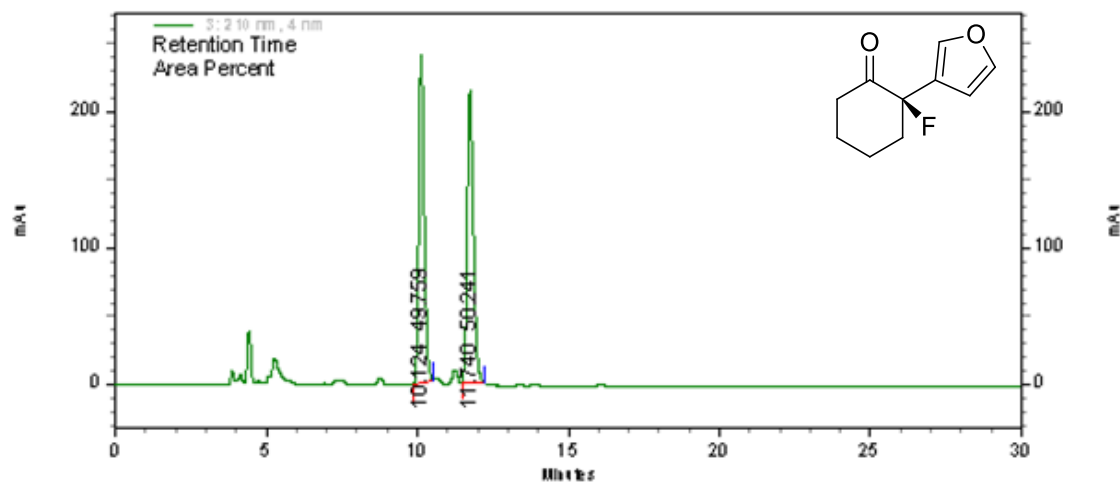

3: 210 nm, 4 nm

Results

| Pk # | Retention Time | Area Percent | Lambda Max |
|------|----------------|--------------|------------|
| 1    | 10.124         | 49.759       | 207        |
| 2    | 11.740         | 50.241       | 207        |

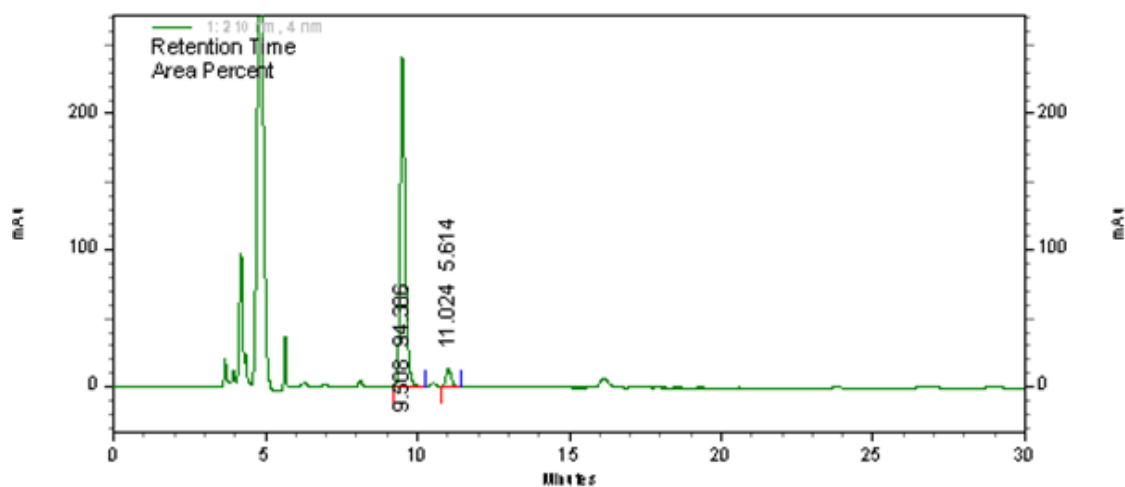

1: 210 nm, 4 nm

Results

| Pk # | Retention Time | Area Percent | Lambda Max |
|------|----------------|--------------|------------|
| 1    | 9.508          | 94.386       | 207        |
| 2    | 11.024         | 5.614        | 669        |

**(R)-2-fluoro-2-(3-iodophenyl)cyclohexanone (2j)**

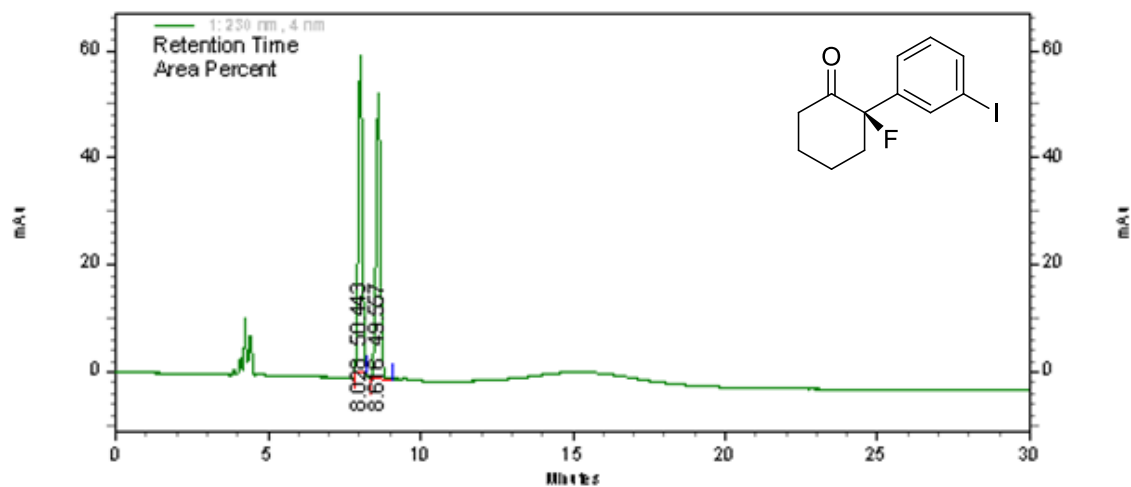

1: 230 nm, 4 nm

Results

| Pk # | Retention Time | Area Percent | Lambda Max |
|------|----------------|--------------|------------|
| 1    | 8.028          | 50.443       | 206        |
| 2    | 8.616          | 49.557       | 206        |

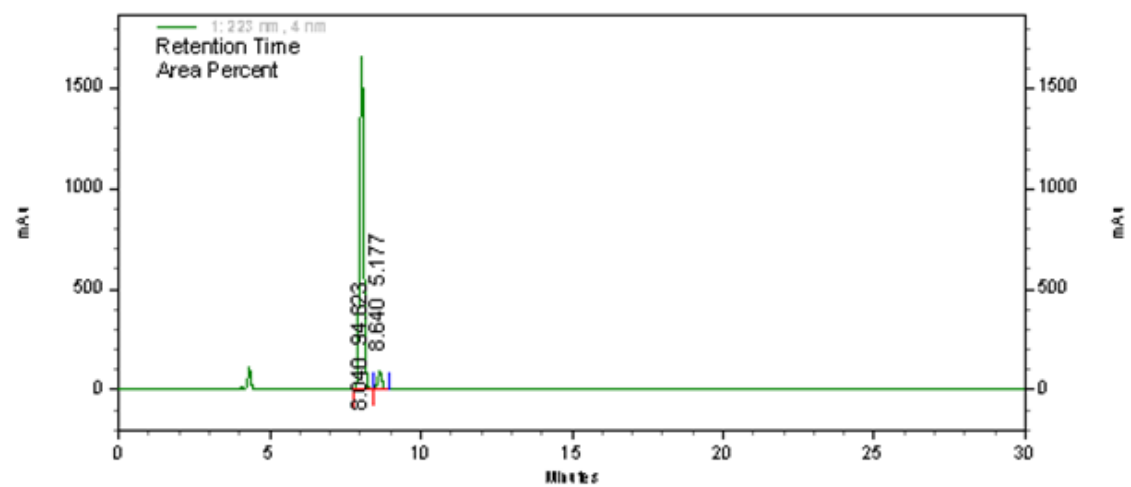

1: 223 nm, 4 nm

Results

| Pk # | Retention Time | Area Percent | Lambda Max |
|------|----------------|--------------|------------|
| 1    | 8.040          | 94.823       | 210        |
| 2    | 8.640          | 5.177        | 205        |



**(R)-7-fluoro-7-phenyl-1,4-dioxaspiro[4.5]decan-8-one (2k)**

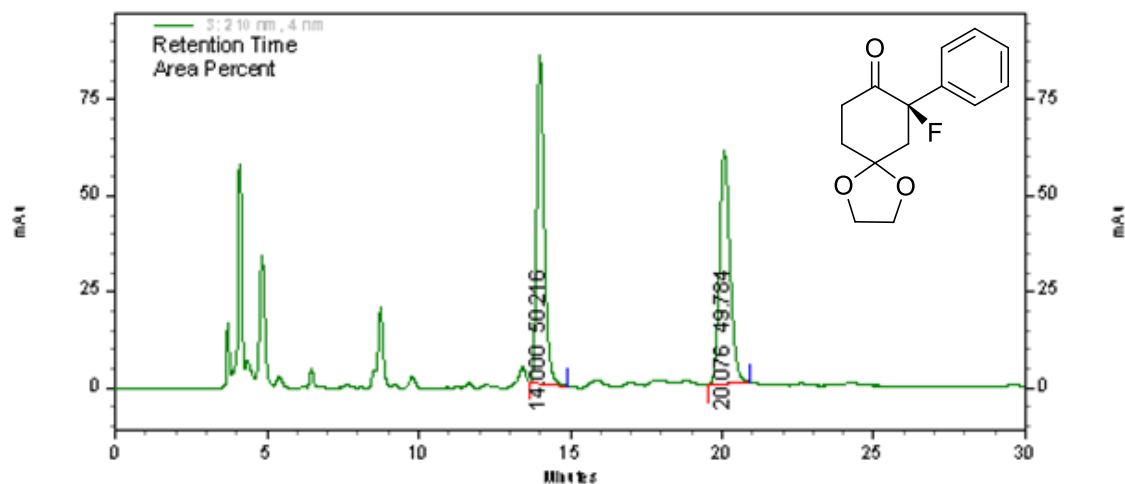

3: 210 nm, 4 nm

Results

| Pk # | Retention Time | Area Percent | Lambda Max |
|------|----------------|--------------|------------|
| 1    | 14.000         | 50.216       | 205        |
| 2    | 20.076         | 49.784       | 205        |

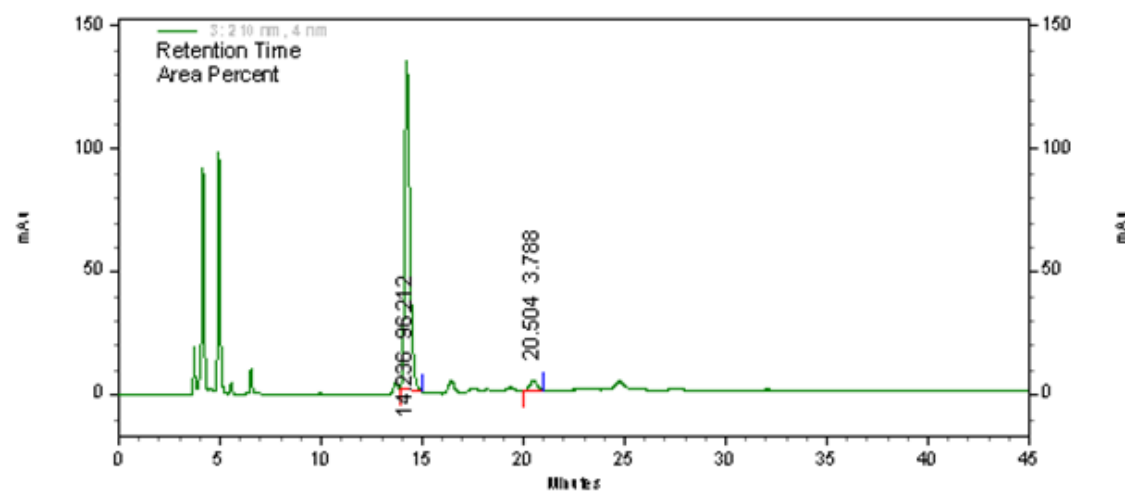

3: 210 nm, 4 nm

Results

| Pk # | Retention Time | Area Percent | Lambda Max |
|------|----------------|--------------|------------|
| 1    | 14.236         | 96.212       | 205        |
| 2    | 20.504         | 3.788        | 681        |

**(S)-3-fluoro-3-phenyldihydro-2H-pyran-4(3H)-one (2l)**

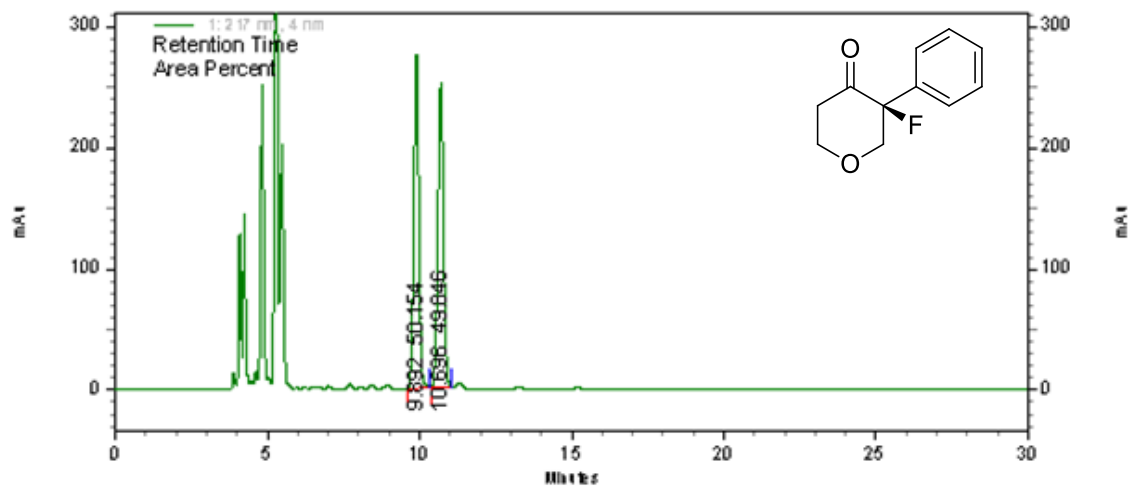

1: 217 nm, 4 nm

Results

| Pk # | Retention Time | Area Percent | Lambda Max |
|------|----------------|--------------|------------|
| 1    | 9.892          | 50.154       | 202        |
| 2    | 10.696         | 49.846       | 203        |

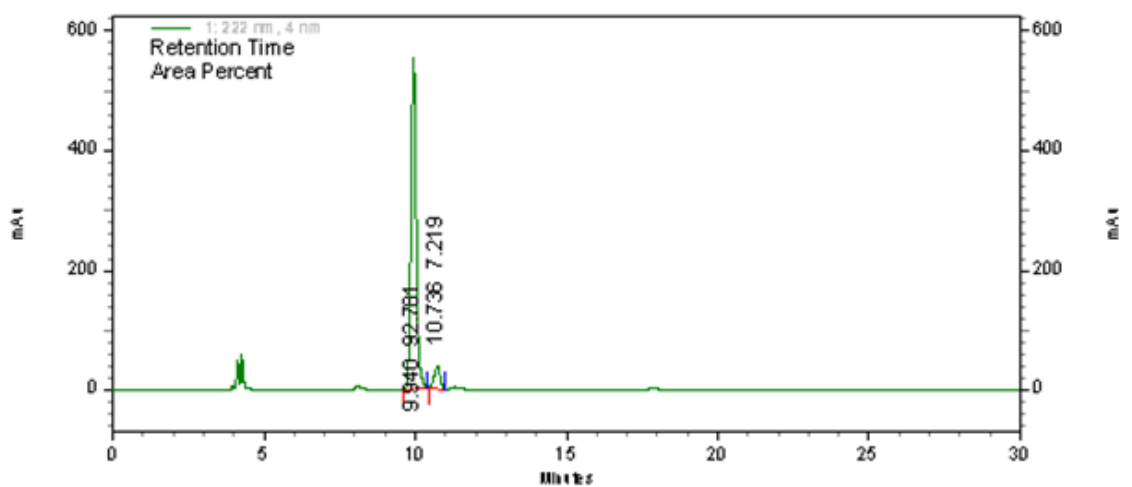

1: 222 nm, 4 nm

Results

| Pk # | Retention Time | Area Percent | Lambda Max |
|------|----------------|--------------|------------|
| 1    | 9.940          | 92.781       | 196        |
| 2    | 10.736         | 7.219        | 204        |

**(S)-3-fluoro-3-phenyl-1-tosylpiperidin-4-one (1m')**

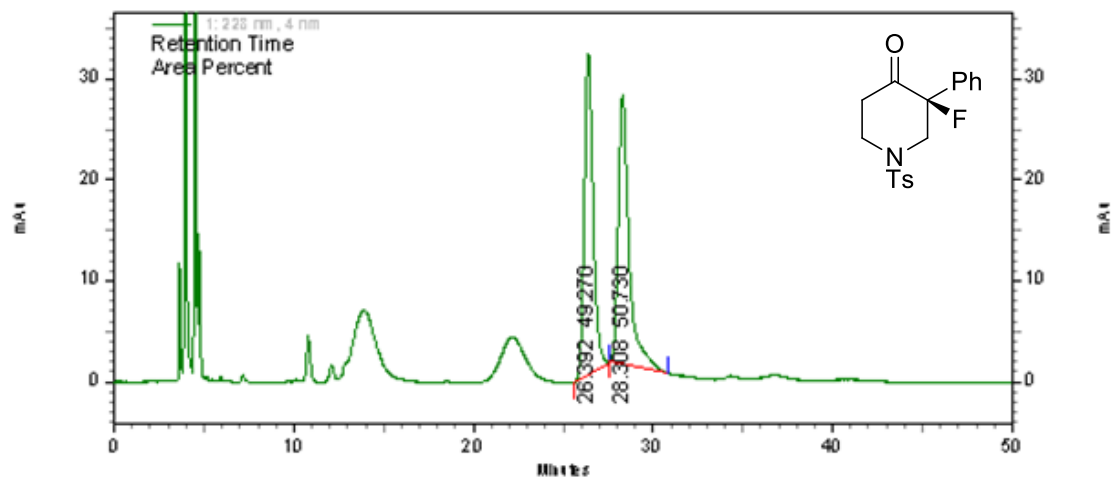

1: 228 nm, 4 nm

Results

| Pk # | Retention Time | Area Percent | Lambda Max |
|------|----------------|--------------|------------|
| 1    | 26.392         | 49.270       | 203        |
| 2    | 28.308         | 50.730       | 192        |

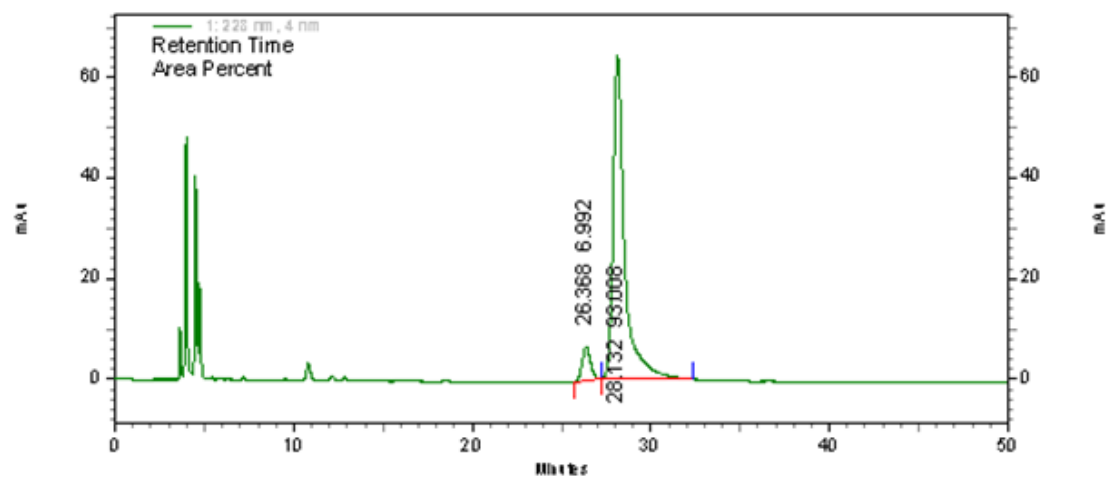

1: 228 nm, 4 nm

Results

| Pk # | Retention Time | Area Percent | Lambda Max |
|------|----------------|--------------|------------|
| 1    | 26.368         | 6.992        | 674        |
| 2    | 28.132         | 93.008       | 203        |

**(R)-1-fluoro-[1,1'-bi(cyclohexan)]-1'-en-2-one (2n)**

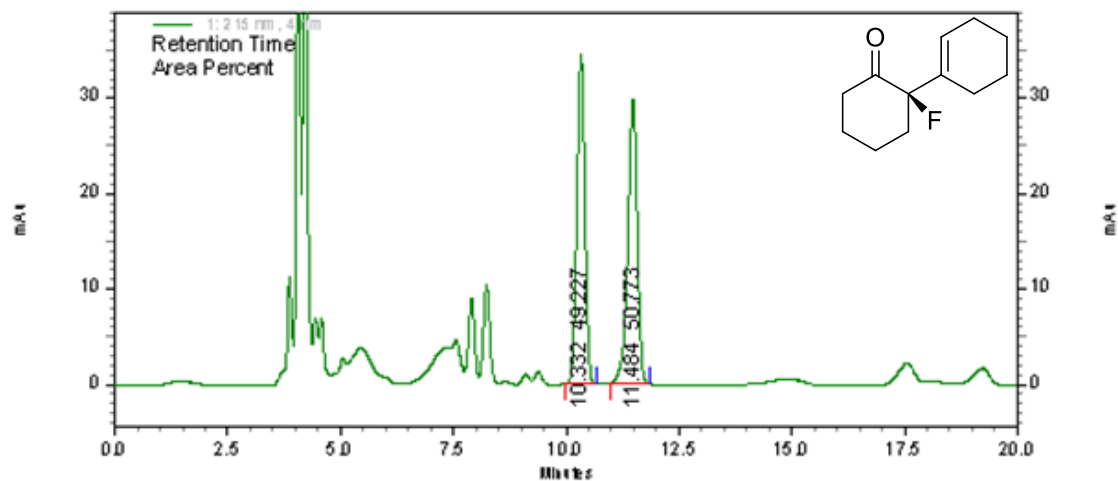

1: 215 nm, 4 nm

Results

| Pk # | Retention Time | Area Percent | Lambda Max |
|------|----------------|--------------|------------|
| 1    | 10.332         | 49.227       | 205        |
| 2    | 11.484         | 50.773       | 205        |

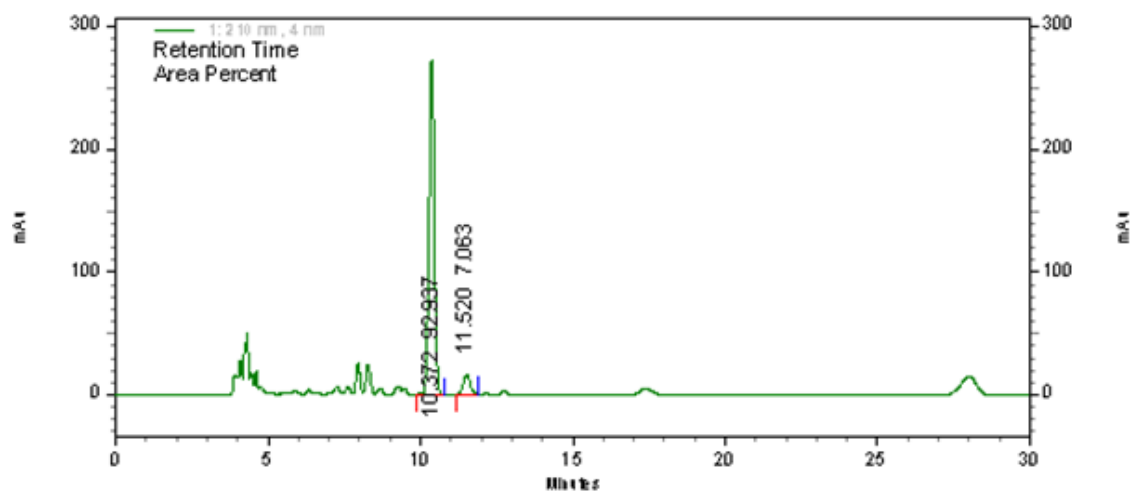

1: 210 nm, 4 nm

Results

| Pk # | Retention Time | Area Percent | Lambda Max |
|------|----------------|--------------|------------|
| 1    | 10.372         | 92.937       | 206        |
| 2    | 11.520         | 7.063        | 205        |

**(R)-2-fluoro-2-(2-methylprop-1-en-1-yl)cyclohexanone (2o)**

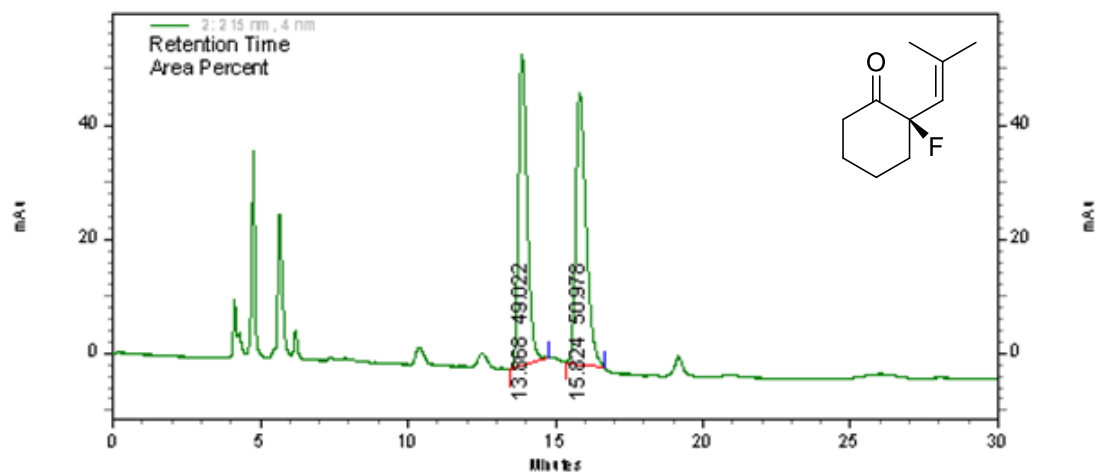

2: 215 nm, 4 nm

Results

| Pk # | Retention Time | Area Percent | Lambda Max |
|------|----------------|--------------|------------|
| 1    | 13.868         | 49.022       | 211        |
| 2    | 15.824         | 50.978       | 212        |

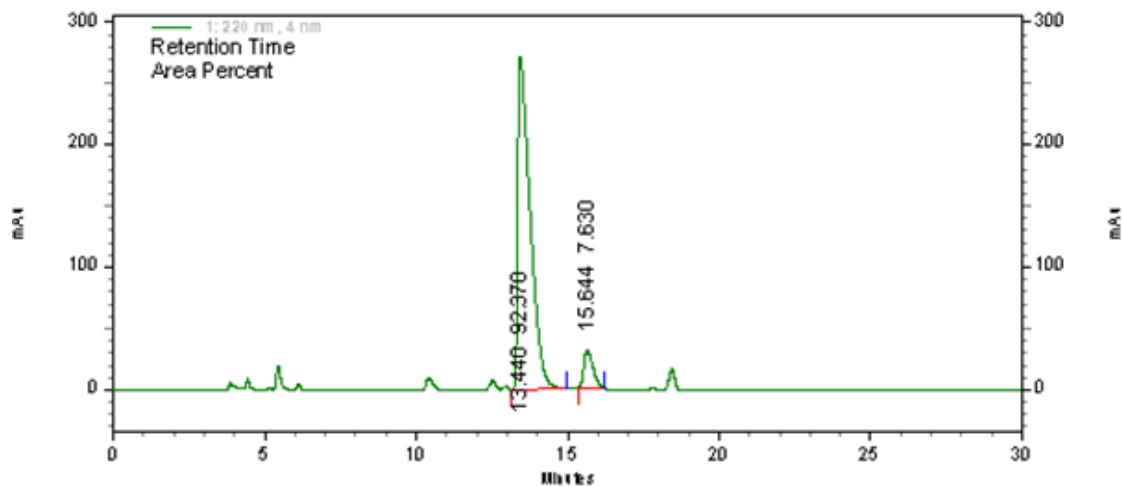

1: 220 nm, 4 nm

Results

| Pk # | Retention Time | Area Percent | Lambda Max |
|------|----------------|--------------|------------|
| 1    | 13.440         | 92.370       | 191        |
| 2    | 15.644         | 7.630        | 212        |

**(R)-2-fluoro-2-(phenylethynyl)cyclohexanone (2p)**

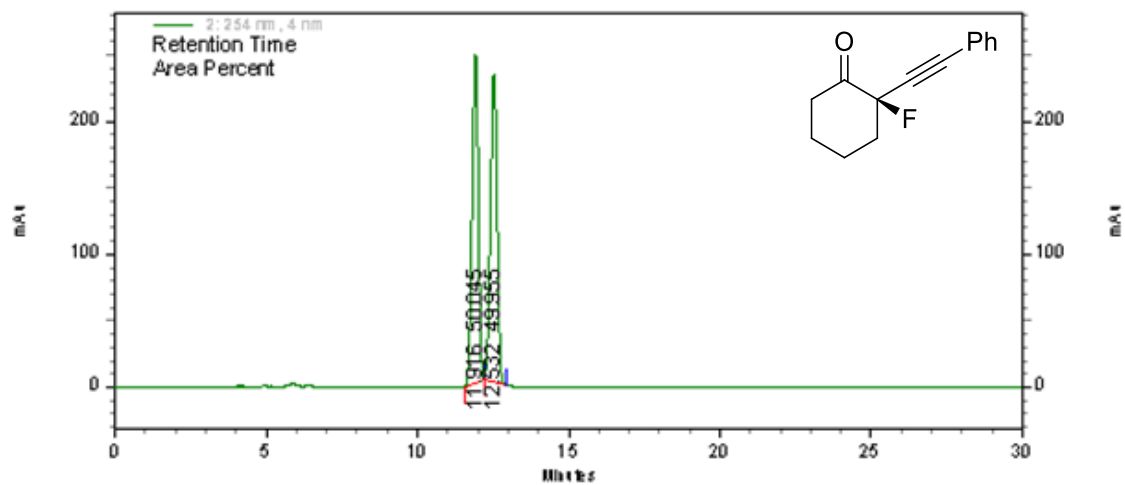

2: 254 nm, 4 nm

Results

| Pk # | Retention Time | Area Percent | Lambda Max |
|------|----------------|--------------|------------|
| 1    | 11.916         | 50.045       | 205        |
| 2    | 12.532         | 49.955       | 205        |

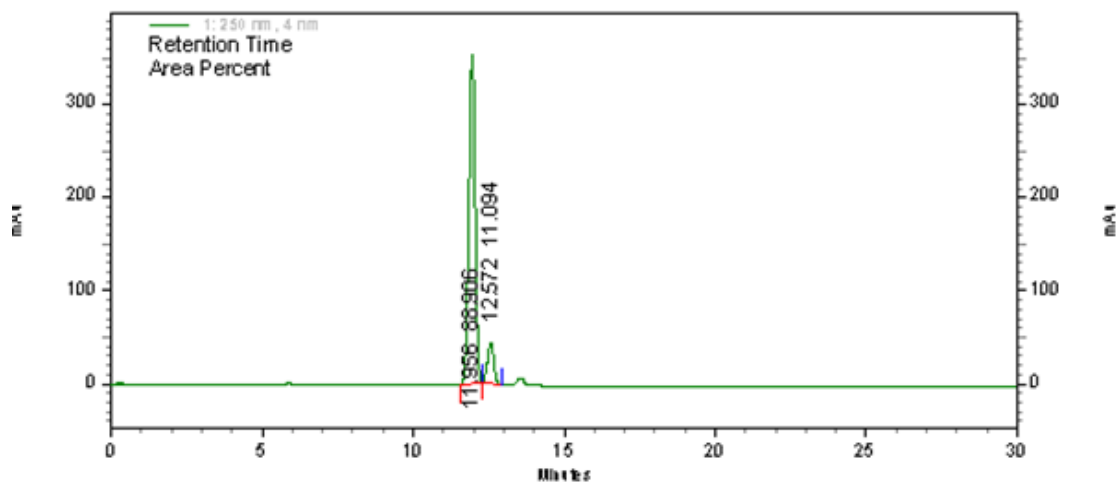

1: 250 nm, 4 nm

Results

| Pk # | Retention Time | Area Percent | Lambda Max |
|------|----------------|--------------|------------|
| 1    | 11.956         | 88.906       | 205        |
| 2    | 12.572         | 11.094       | 205        |

**(R)-2-fluoro-2-(hex-1-yn-1-yl)cyclohexanone (2q)**

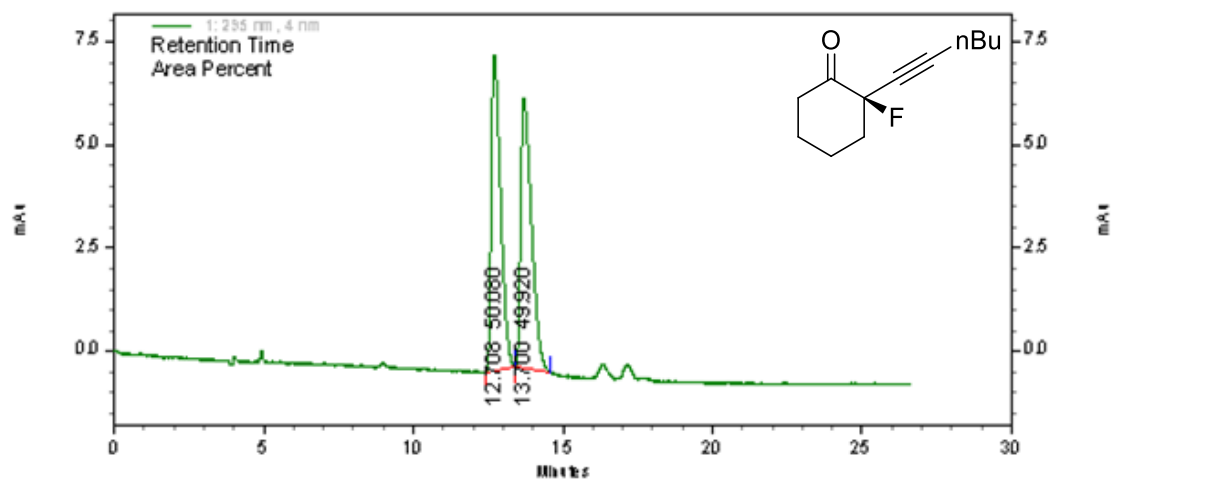

1: 295 nm, 4 nm

Results

| Pk # | Retention Time | Area Percent | Lambda Max |
|------|----------------|--------------|------------|
| 1    | 12.708         | 50.080       | 295        |
| 2    | 13.700         | 49.920       | 295        |

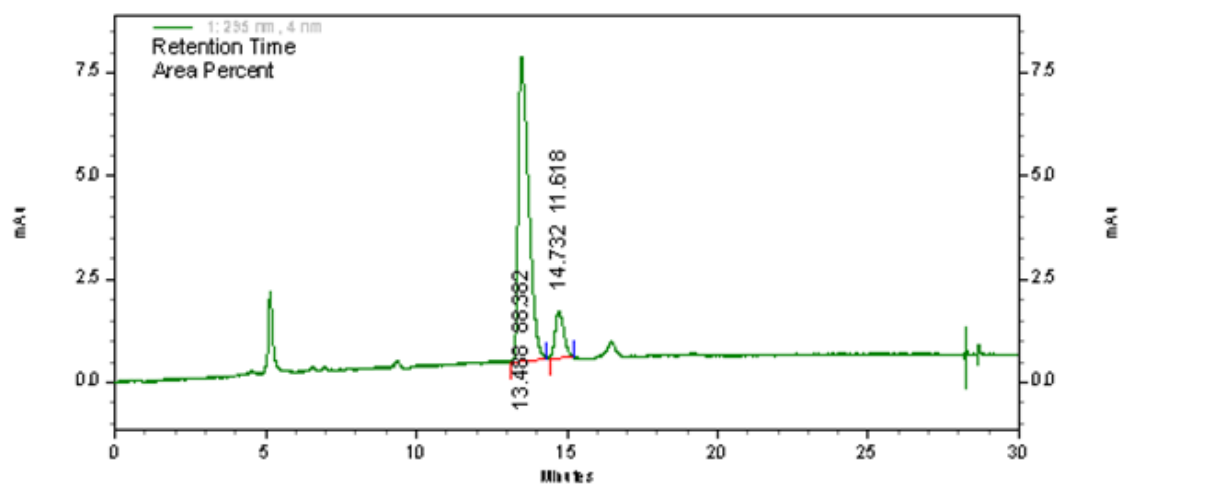

1: 295 nm, 4 nm

Results

| Pk # | Retention Time | Area Percent | Lambda Max |
|------|----------------|--------------|------------|
| 1    | 13.488         | 88.382       | 295        |
| 2    | 14.732         | 11.618       | 648        |

(1*R*,2*R*)-2-fluoro-1,2-diphenylcyclohexanol (3a)

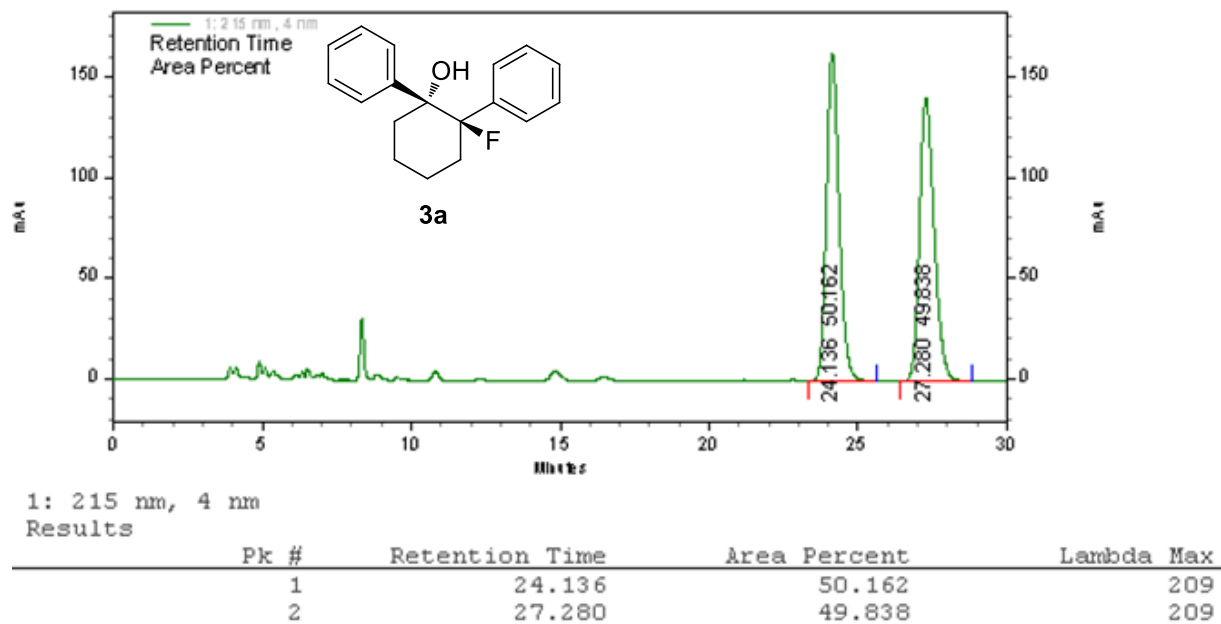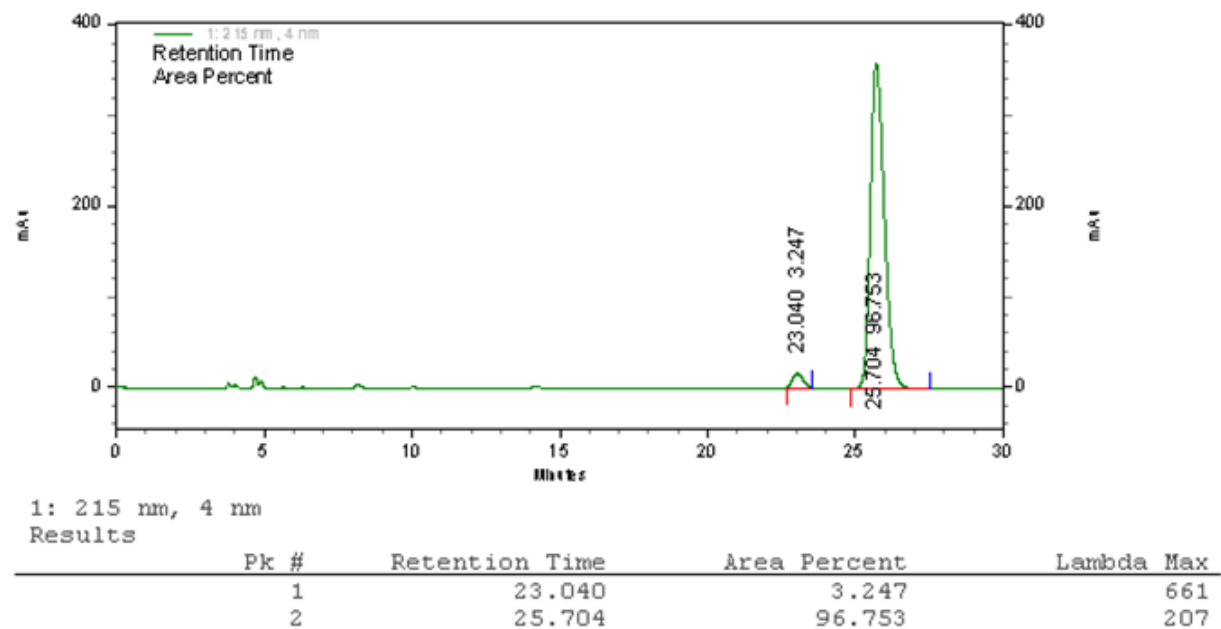



**(1*S*,2*R*)-2-fluoro-2-phenylcyclohexanol (3b)**

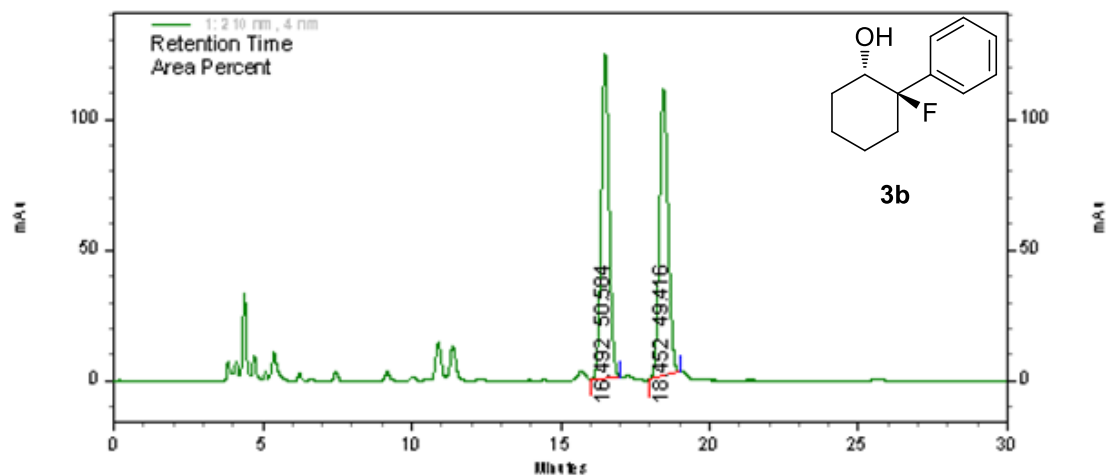

1: 210 nm, 4 nm

Results

| Pk # | Retention Time | Area Percent | Lambda Max |
|------|----------------|--------------|------------|
| 1    | 16.492         | 50.584       | 207        |
| 2    | 18.452         | 49.416       | 207        |

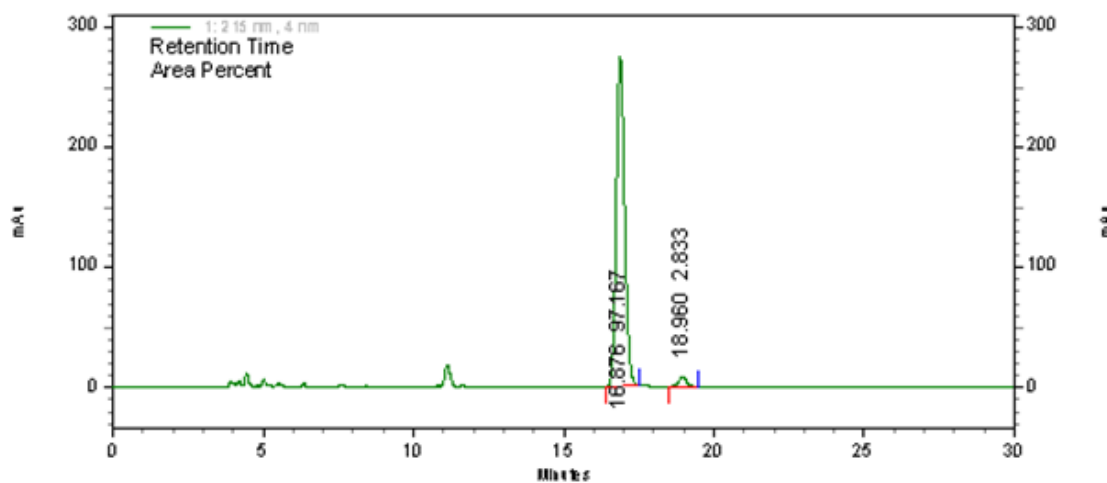

1: 215 nm, 4 nm

Results

| Pk # | Retention Time | Area Percent | Lambda Max |
|------|----------------|--------------|------------|
| 1    | 16.876         | 97.167       | 207        |
| 2    | 18.960         | 2.833        | 675        |

**(*S,E*)-methyl 2-(2-fluoro-2-phenylcyclohexylidene)acetate (**3c**)**

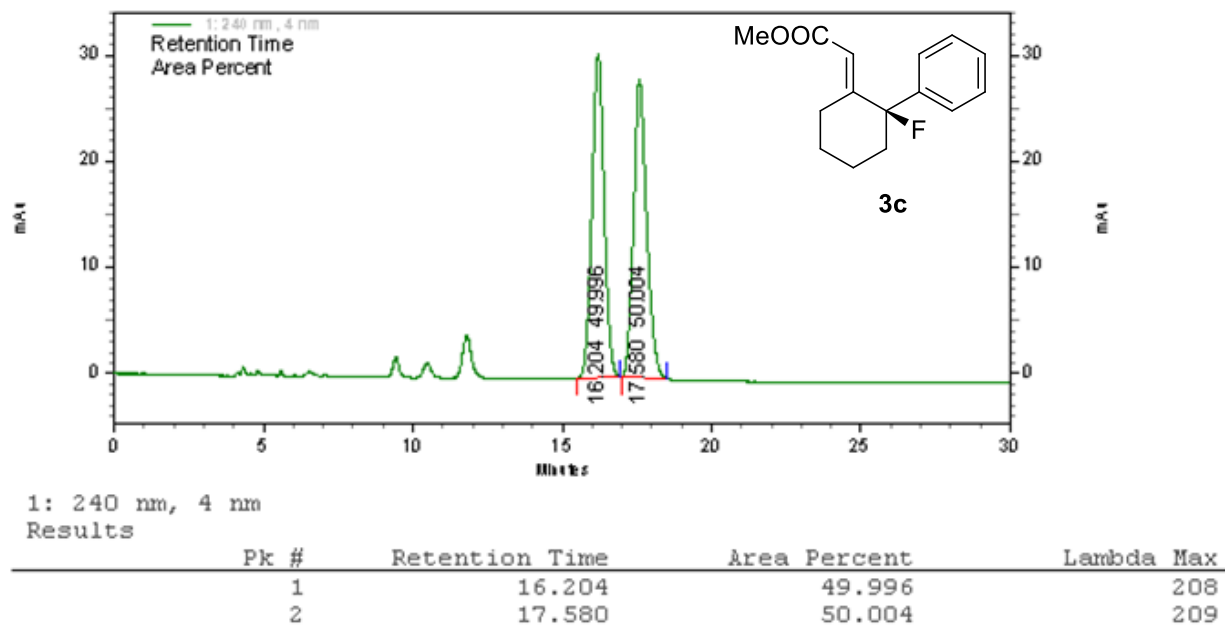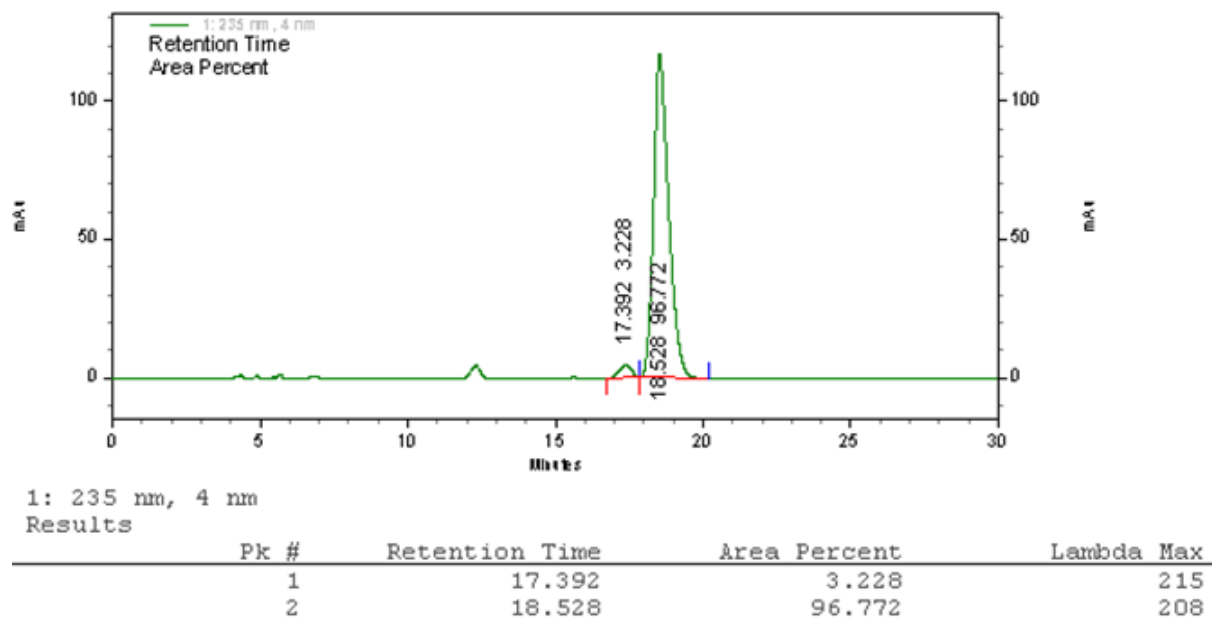

**(R)-2-([1,1'-biphenyl]-3-yl)-2-fluorocyclohexanone (3d)**

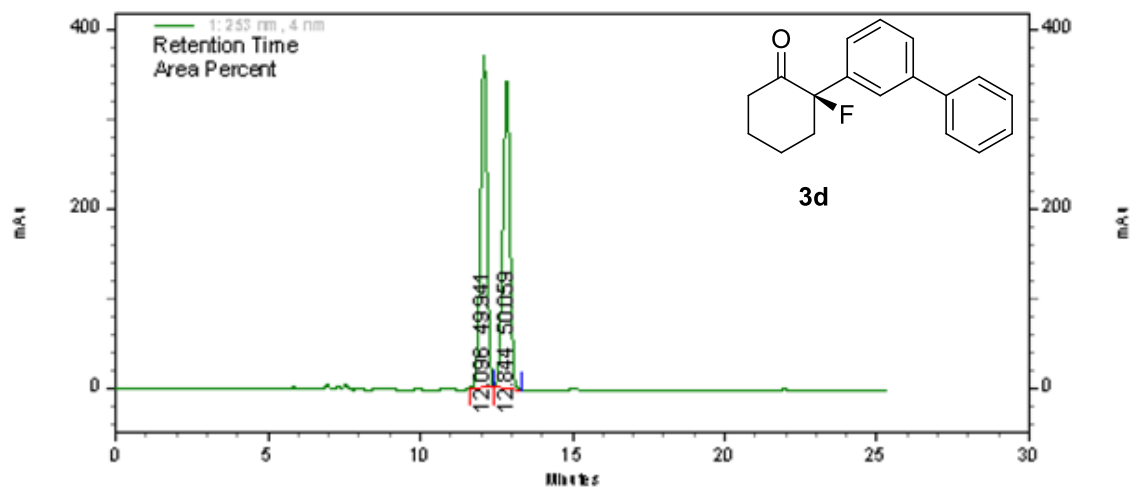

1: 253 nm, 4 nm

Results

| Pk # | Retention Time | Area Percent | Lambda Max |
|------|----------------|--------------|------------|
| 1    | 12.096         | 49.941       | 194        |
| 2    | 12.844         | 50.059       | 193        |

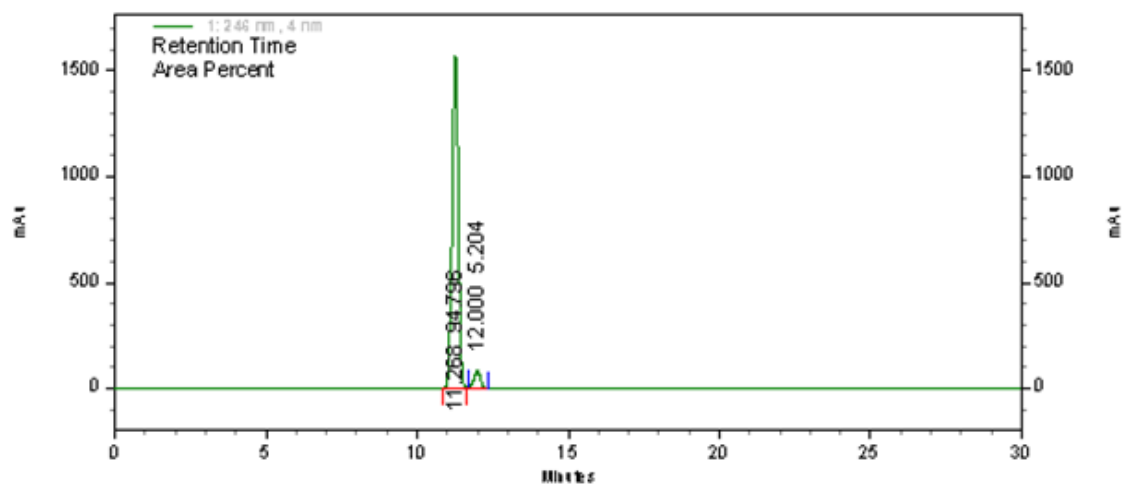

1: 246 nm, 4 nm

Results

| Pk # | Retention Time | Area Percent | Lambda Max |
|------|----------------|--------------|------------|
| 1    | 11.268         | 94.796       | 209        |
| 2    | 12.000         | 5.204        | 206        |

# O-Benzyl (D)-Tyrosine methyl ester hydrochloride (A7)

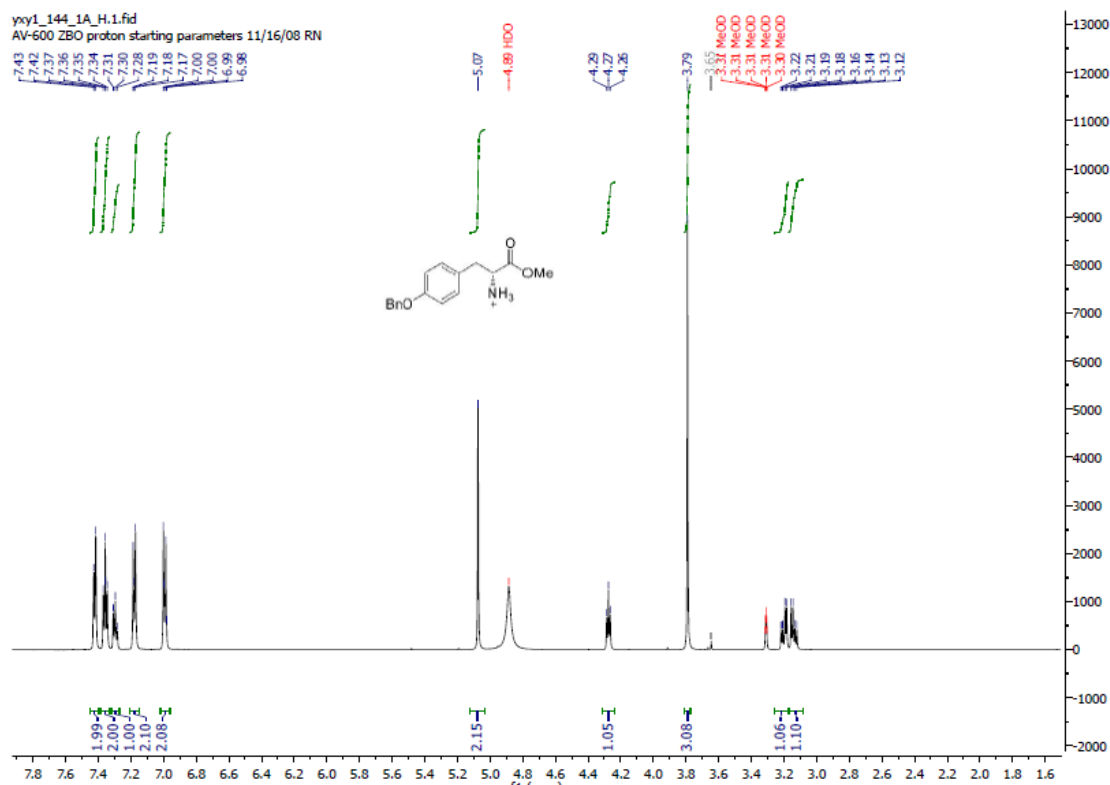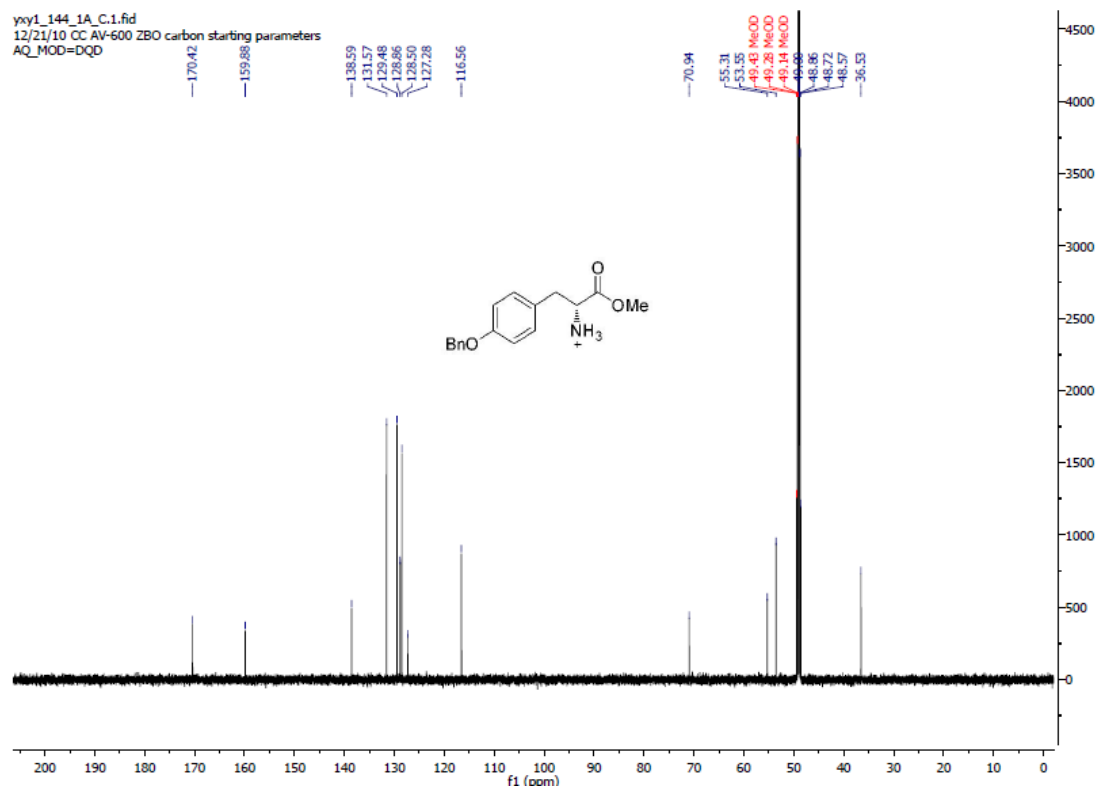

# O-Benzoyl (D)-Tyrosine methyl ester hydrochloride (A8)

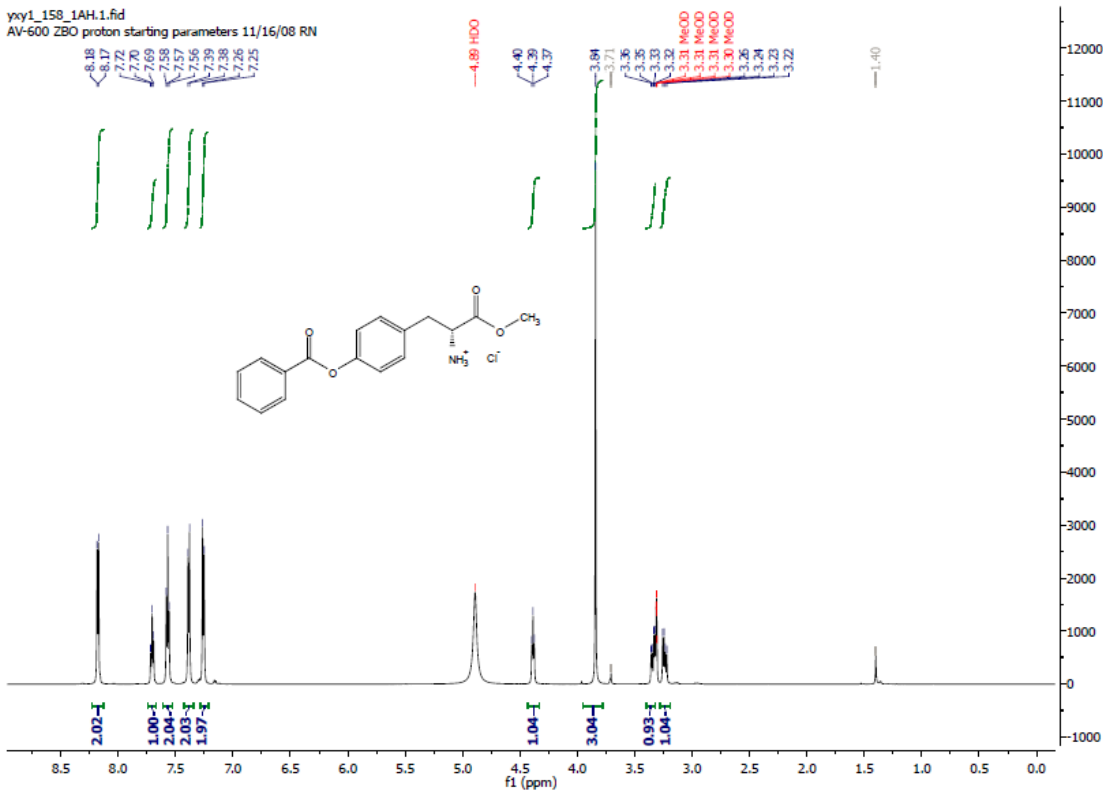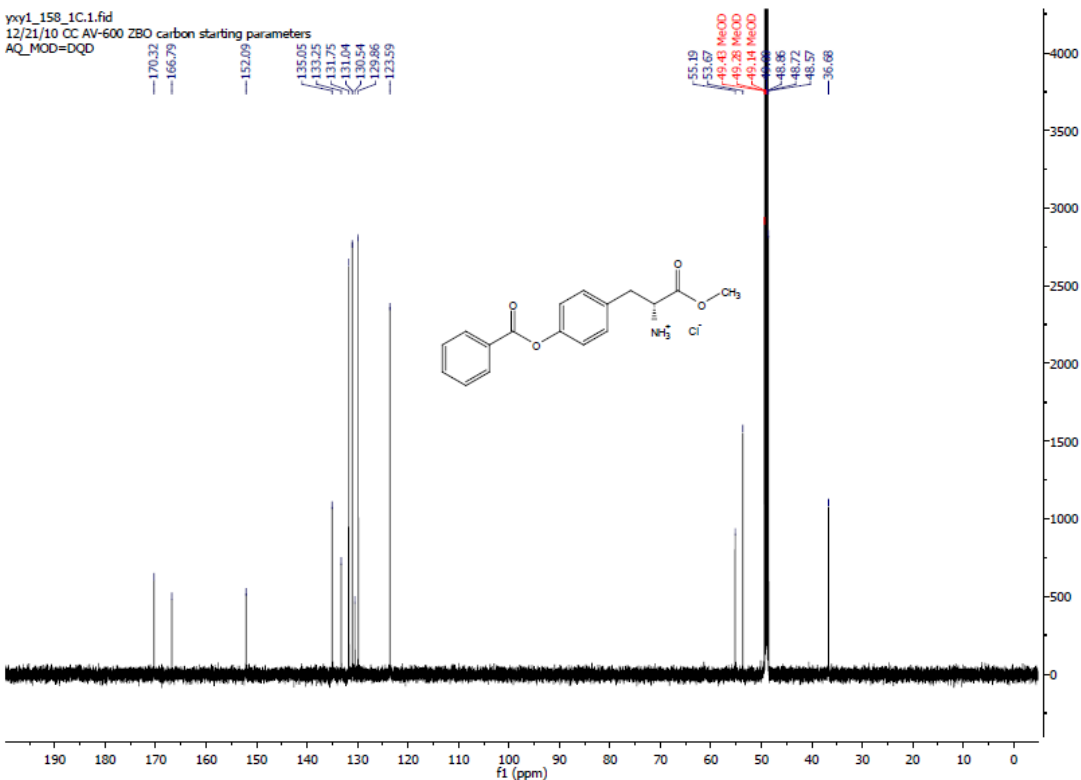

(D)-cyclohexylalanine methyl ester hydrochloride (A10)

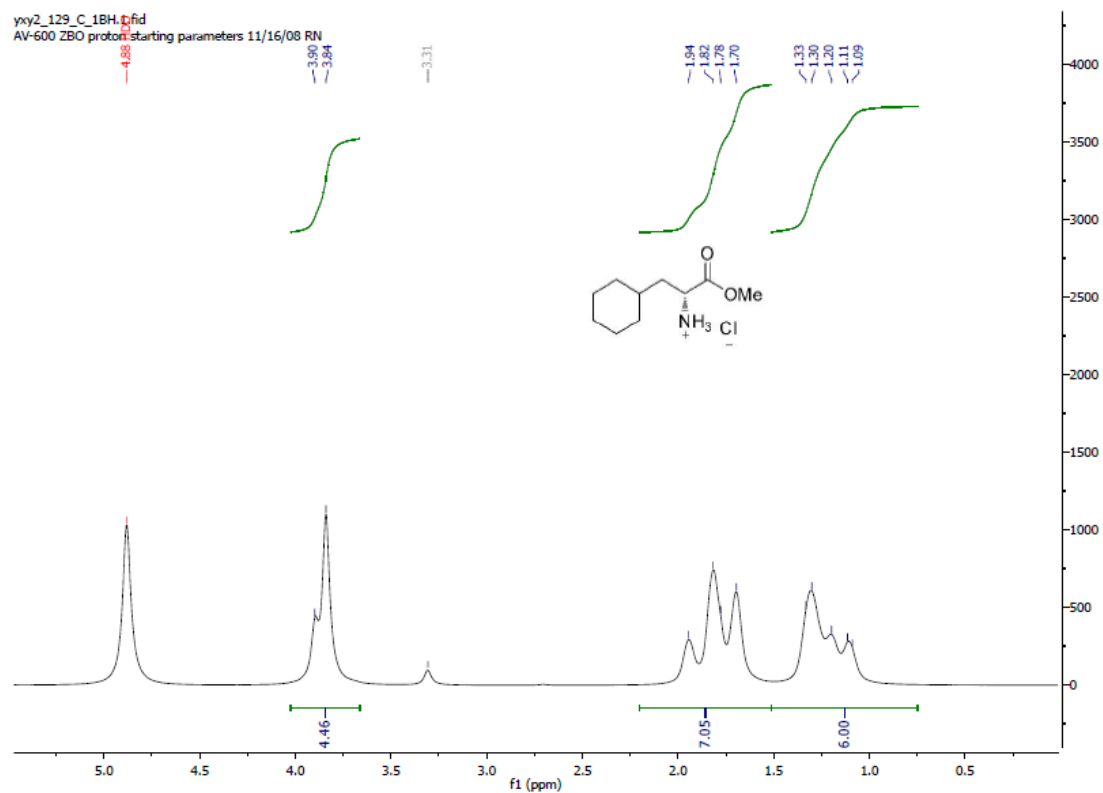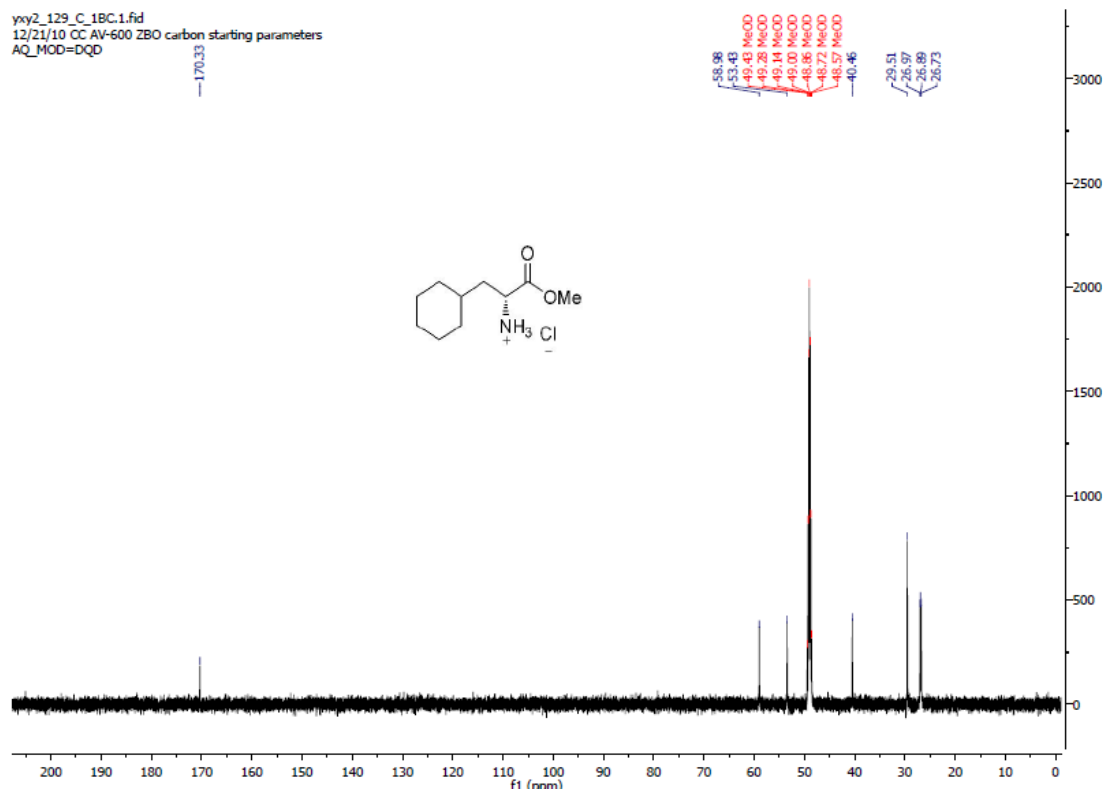

# (D)-2-naphthylalanine methyl ester hydrochloride (A11)

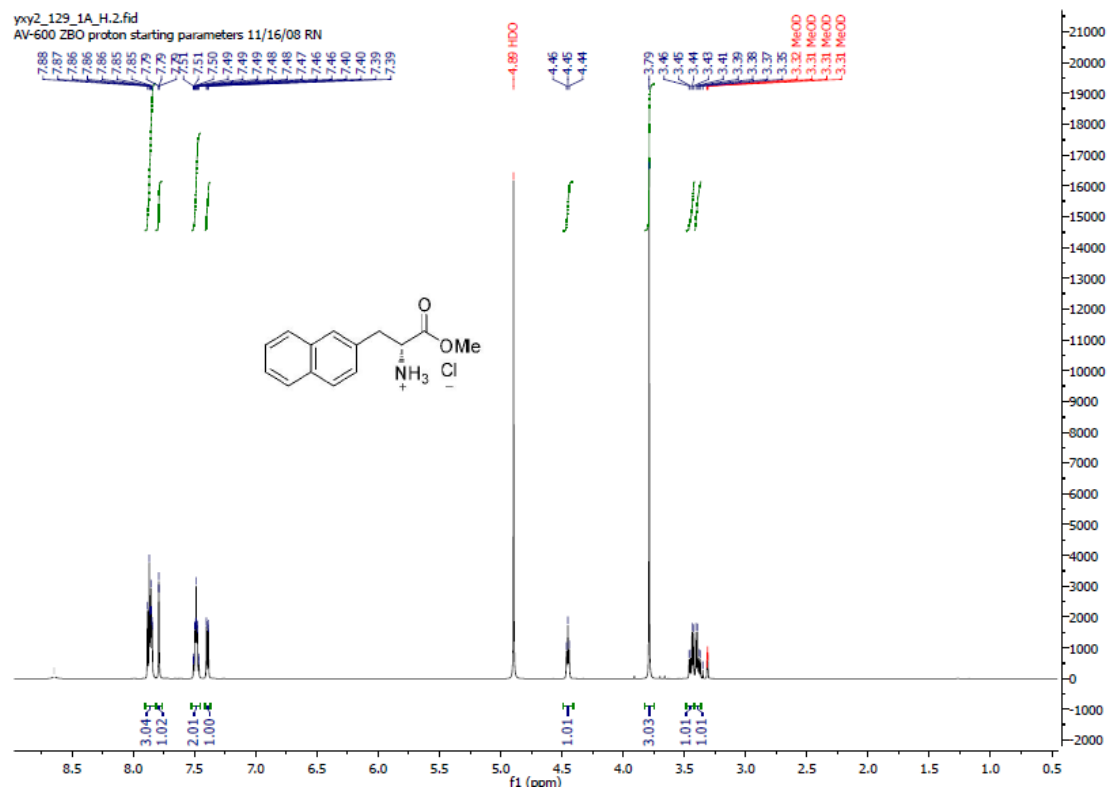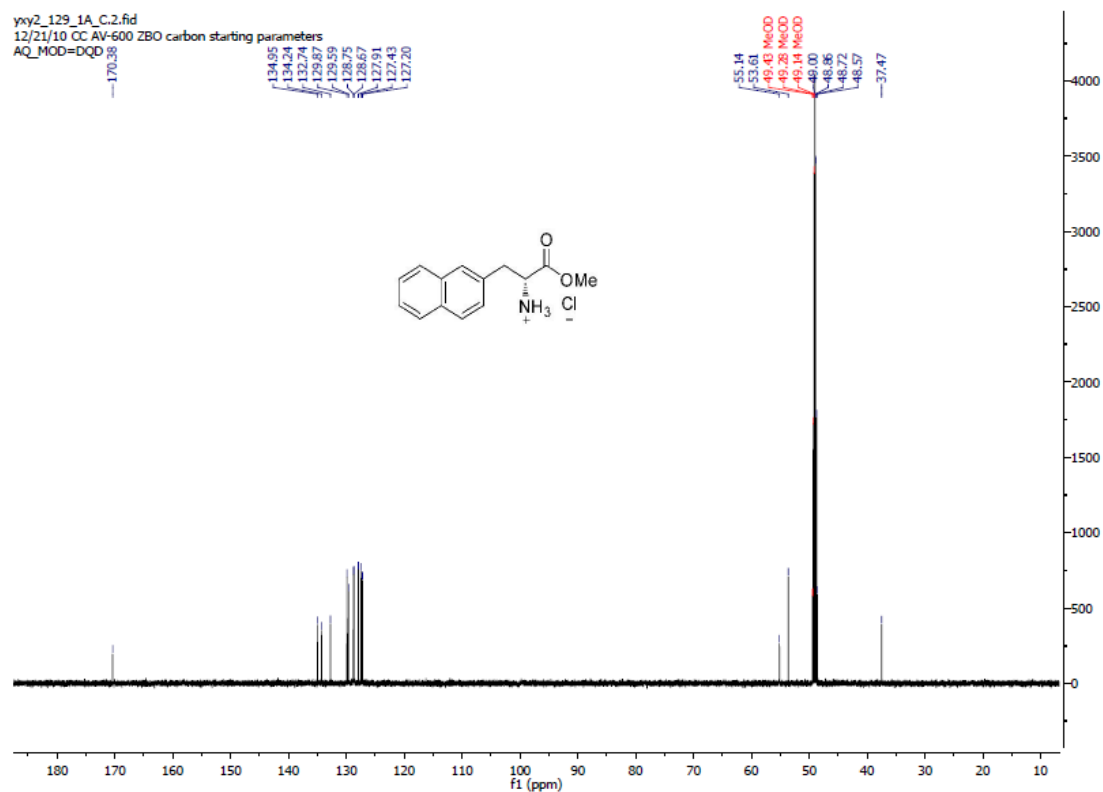

(D)-9-anthracylalanine methyl ester hydrochloride (A12)

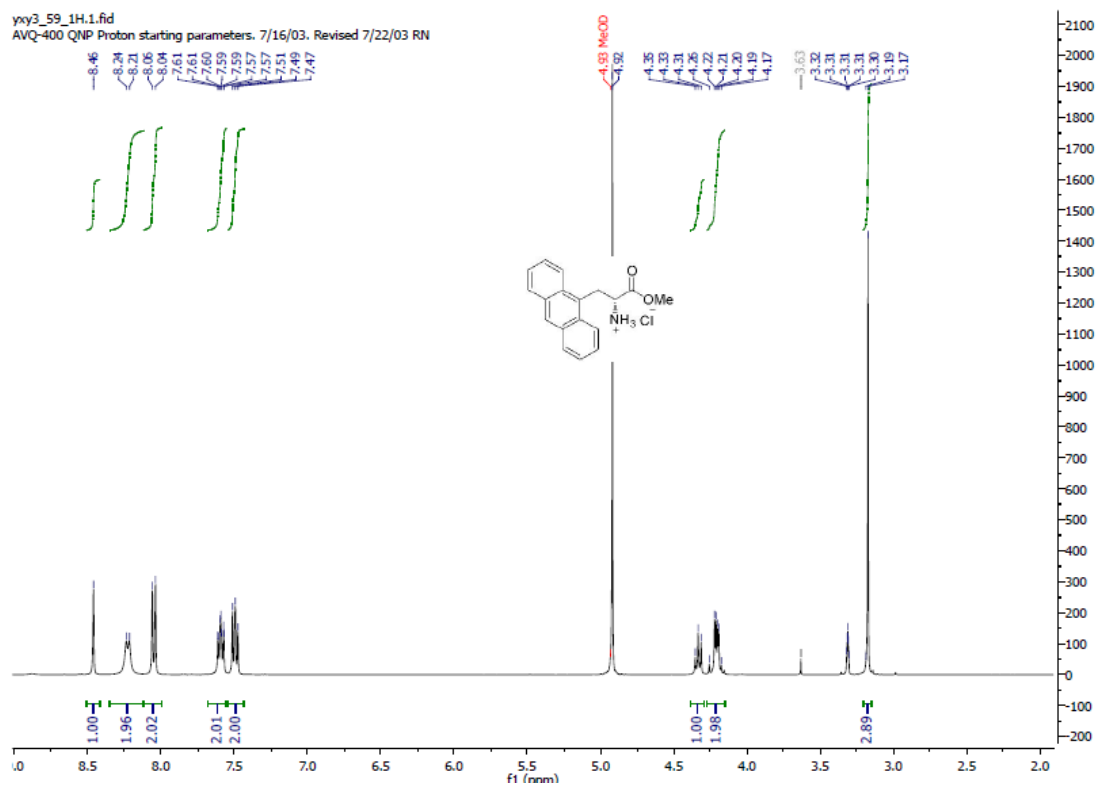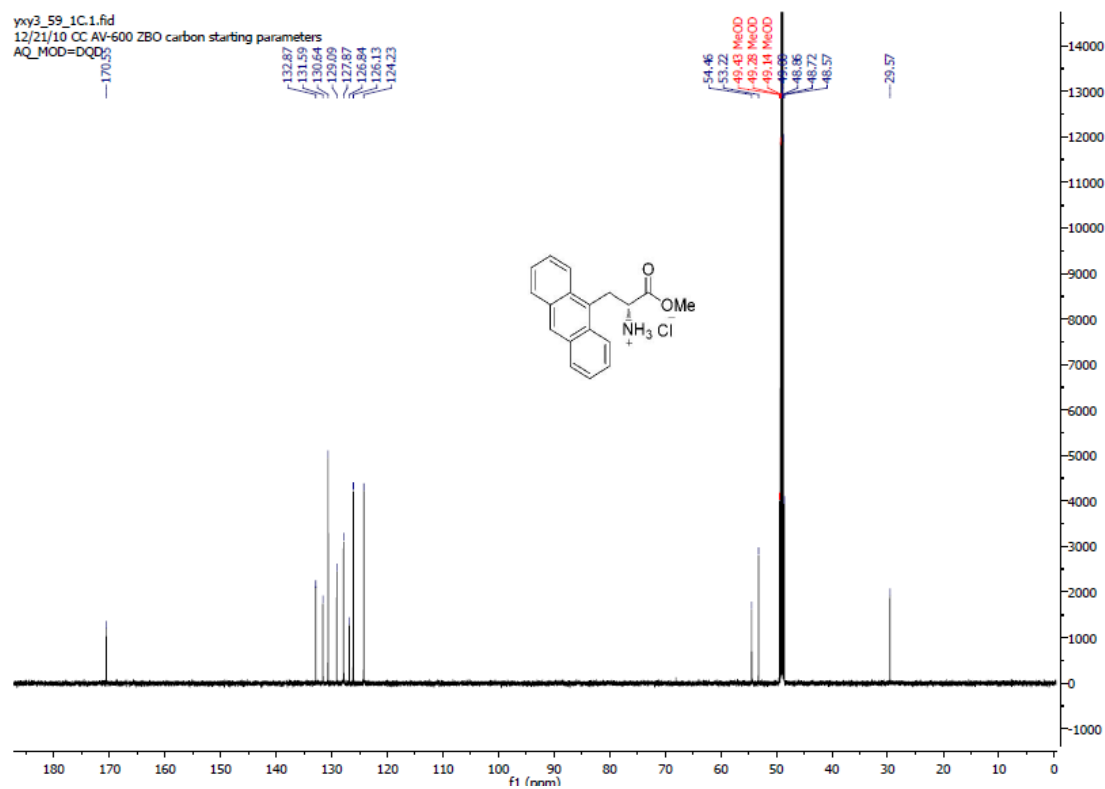



(D)-1-naphthylalanine methyl ester hydrochloride (**A13**)

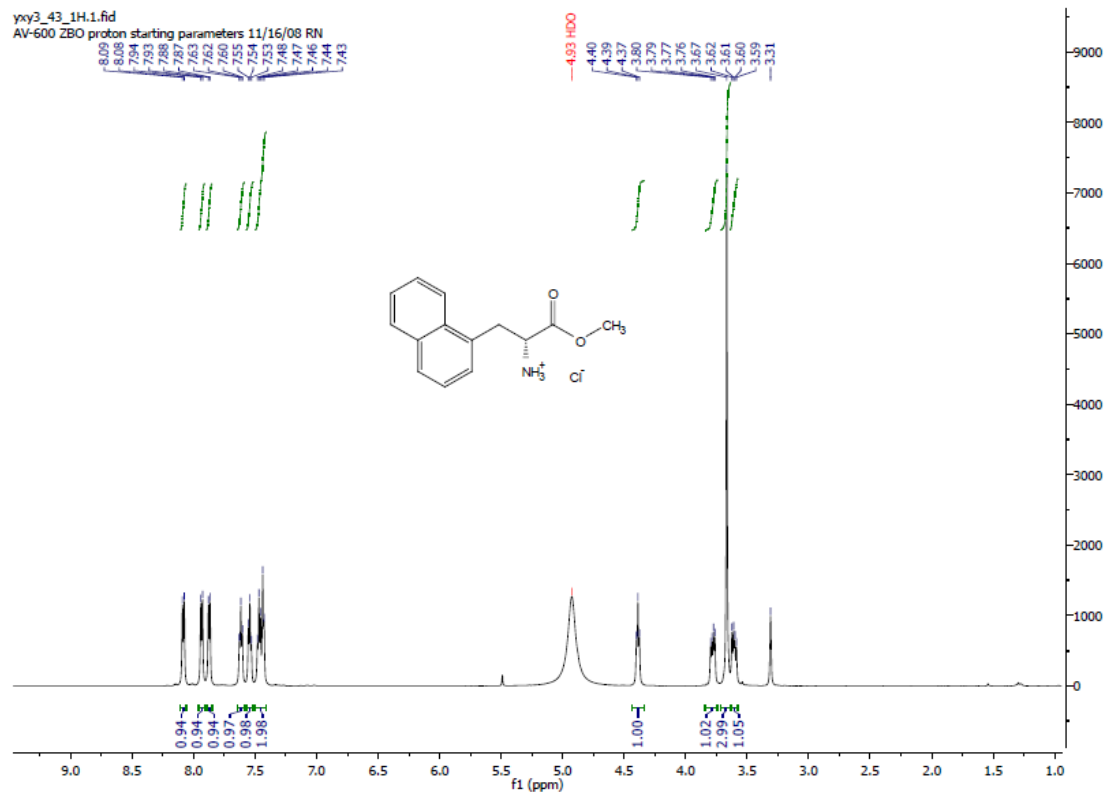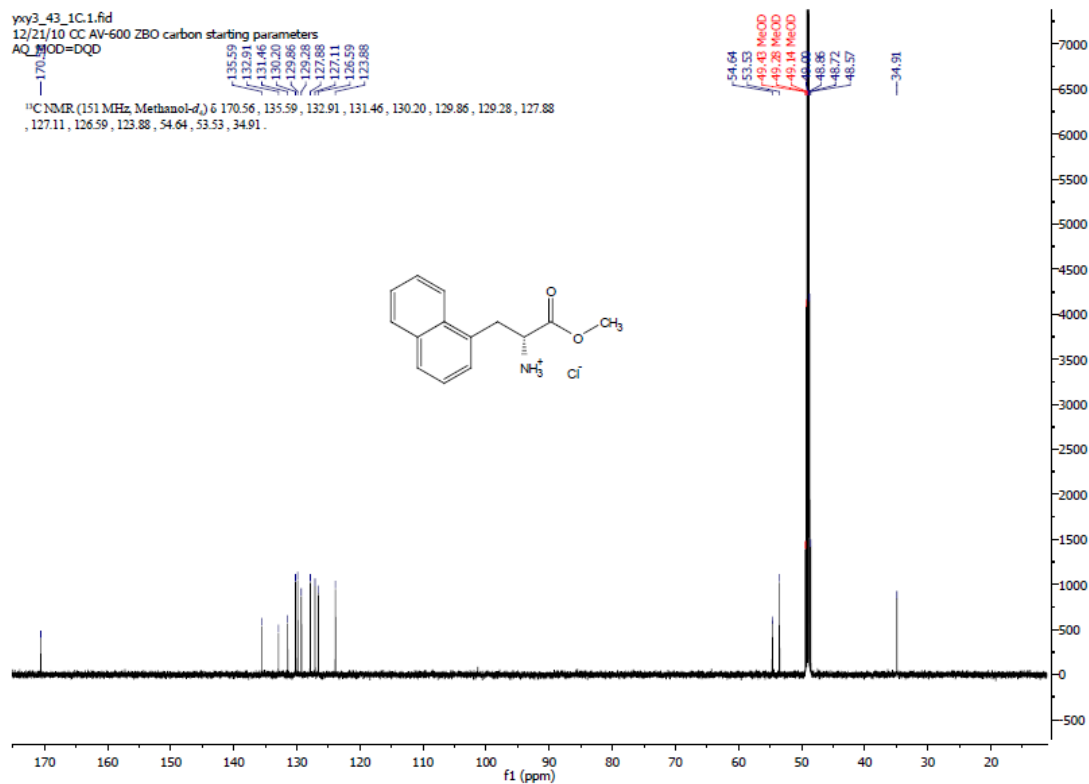

2-(3-bromophenyl)cyclohexanone (**1g**)

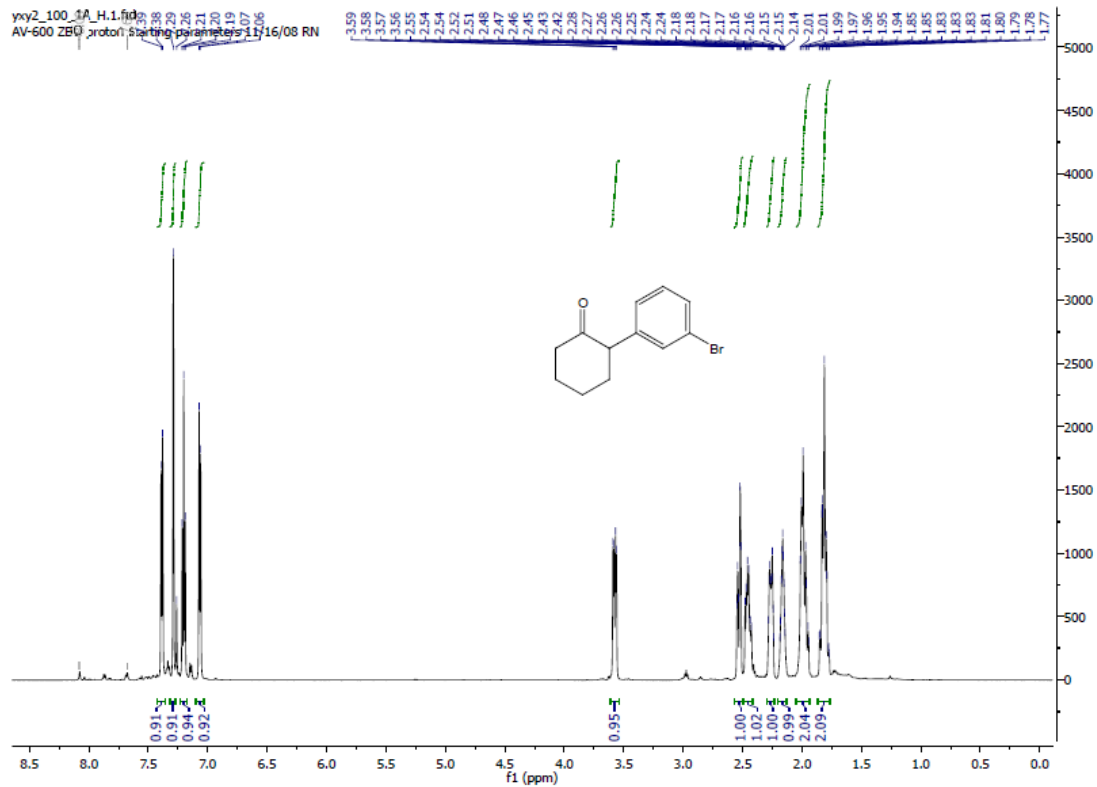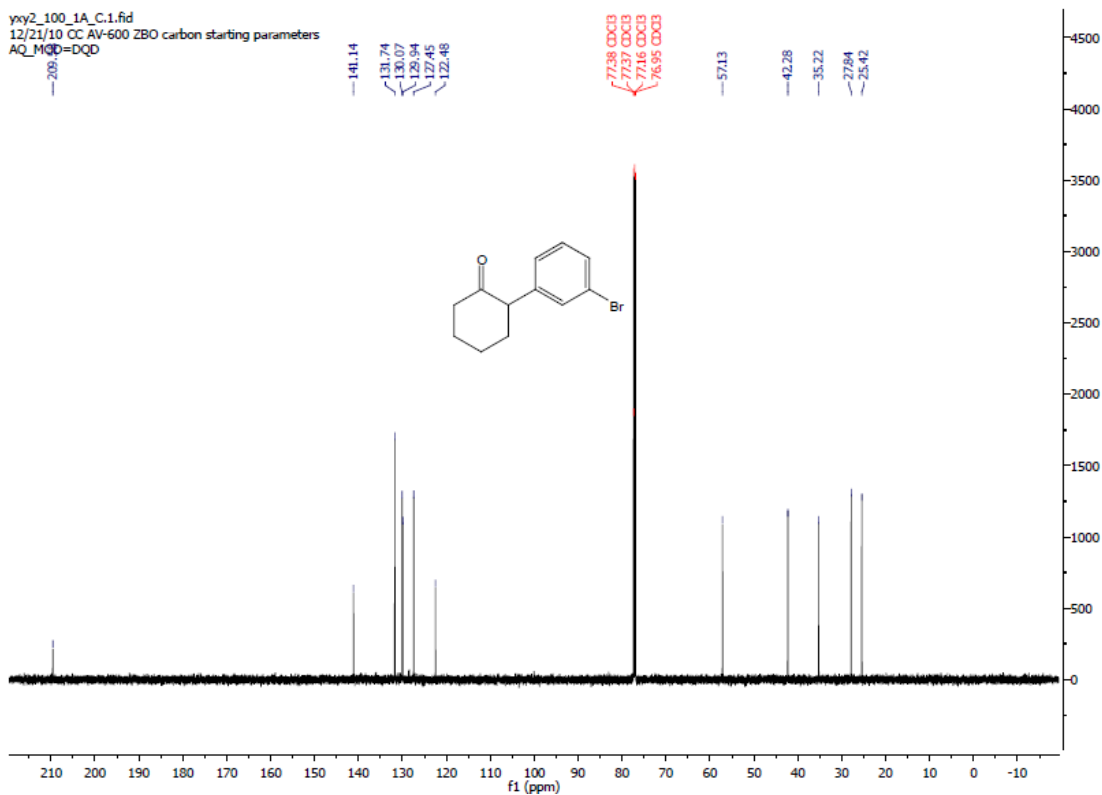

2-(furan-3-yl)cyclohexanone (**1i**)

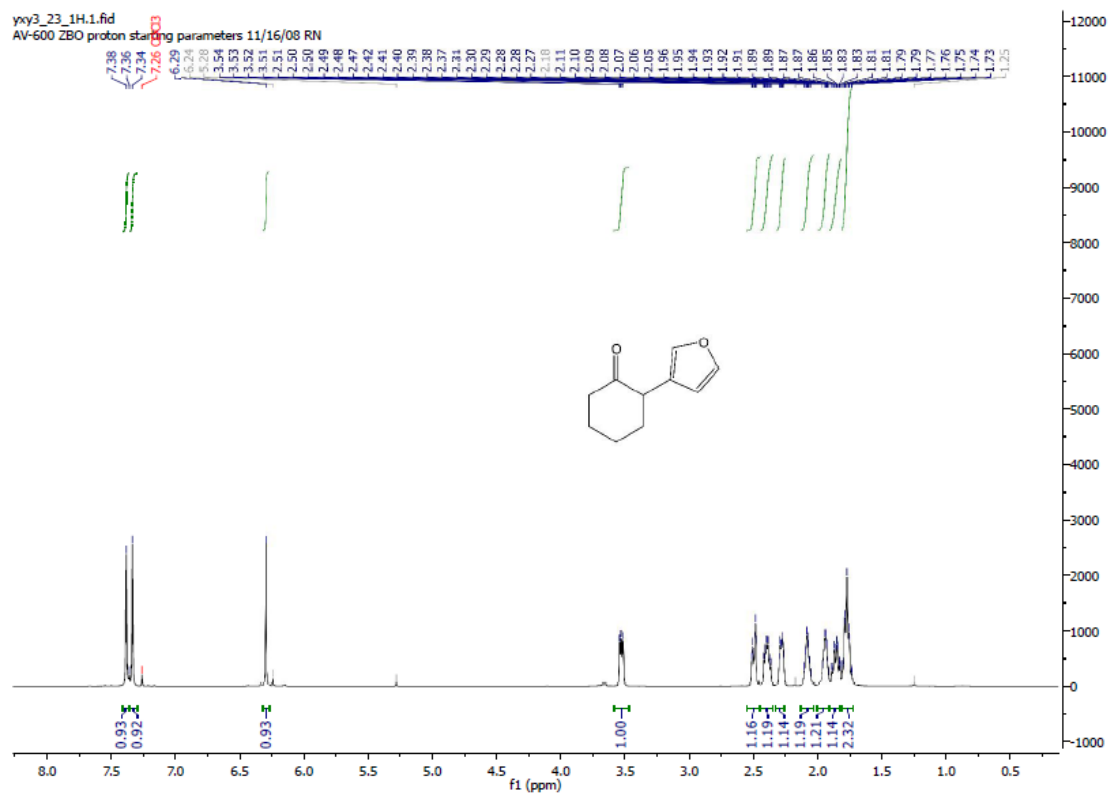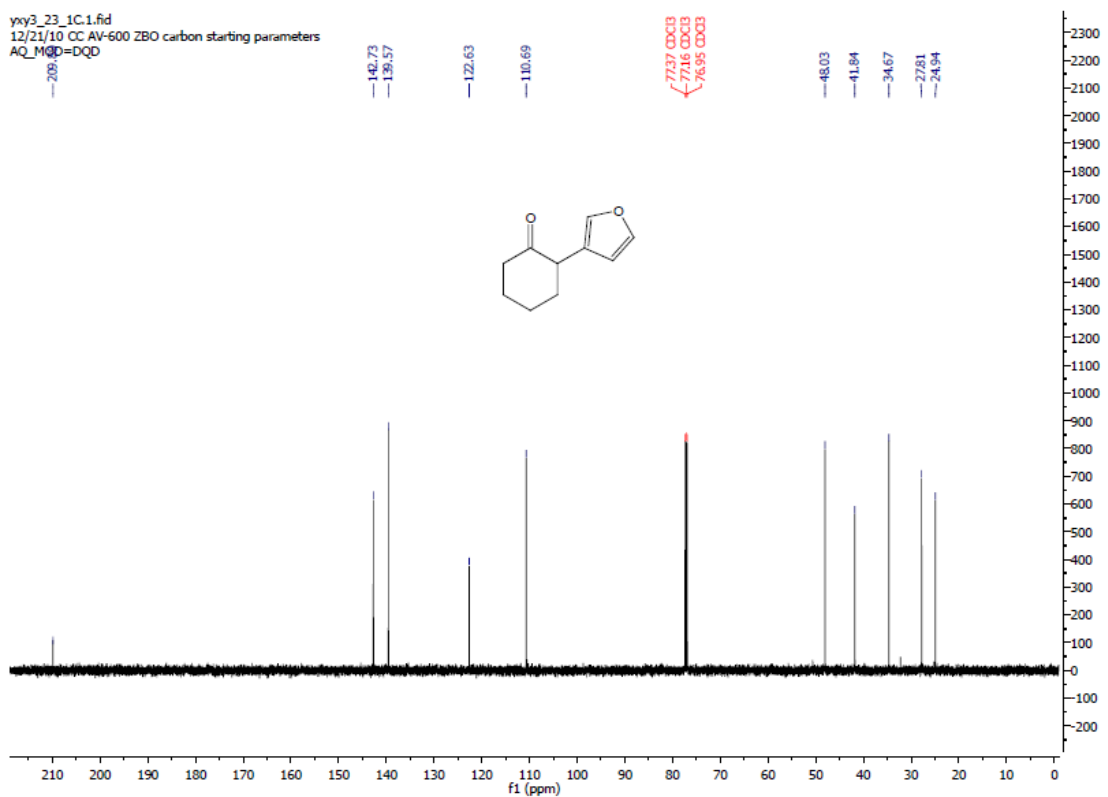

# 2-(3-iodophenyl)cyclohexanone (**1j**)

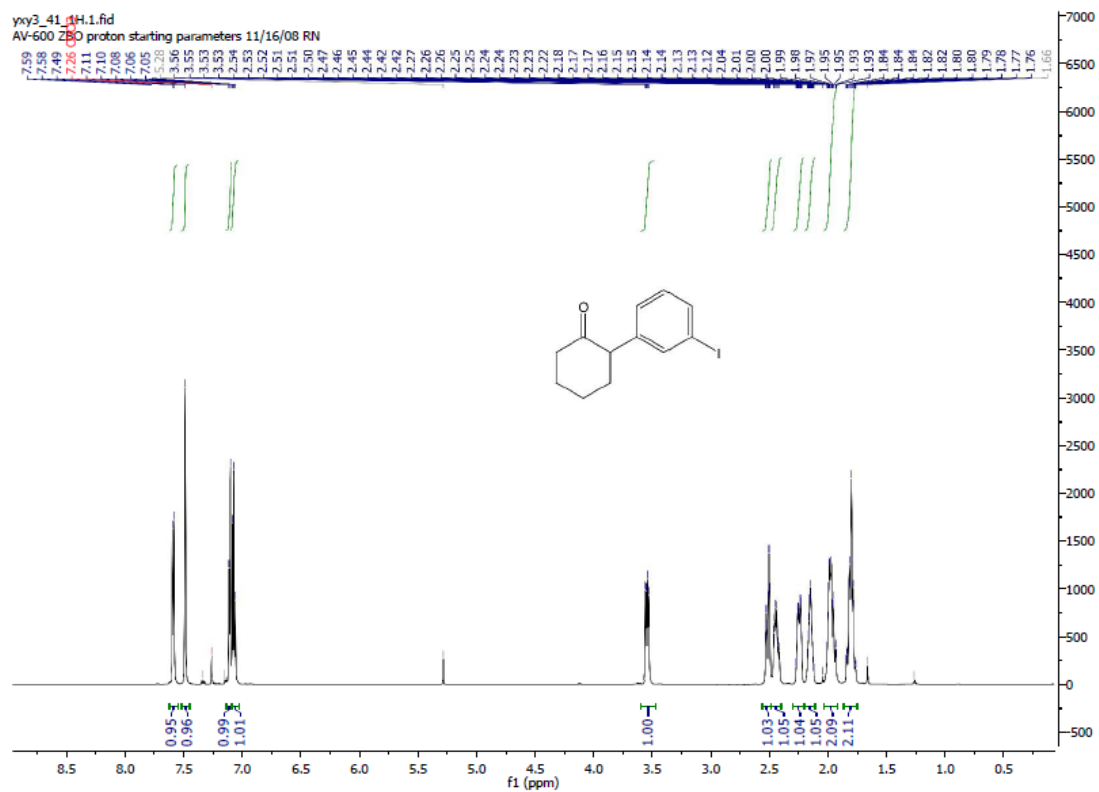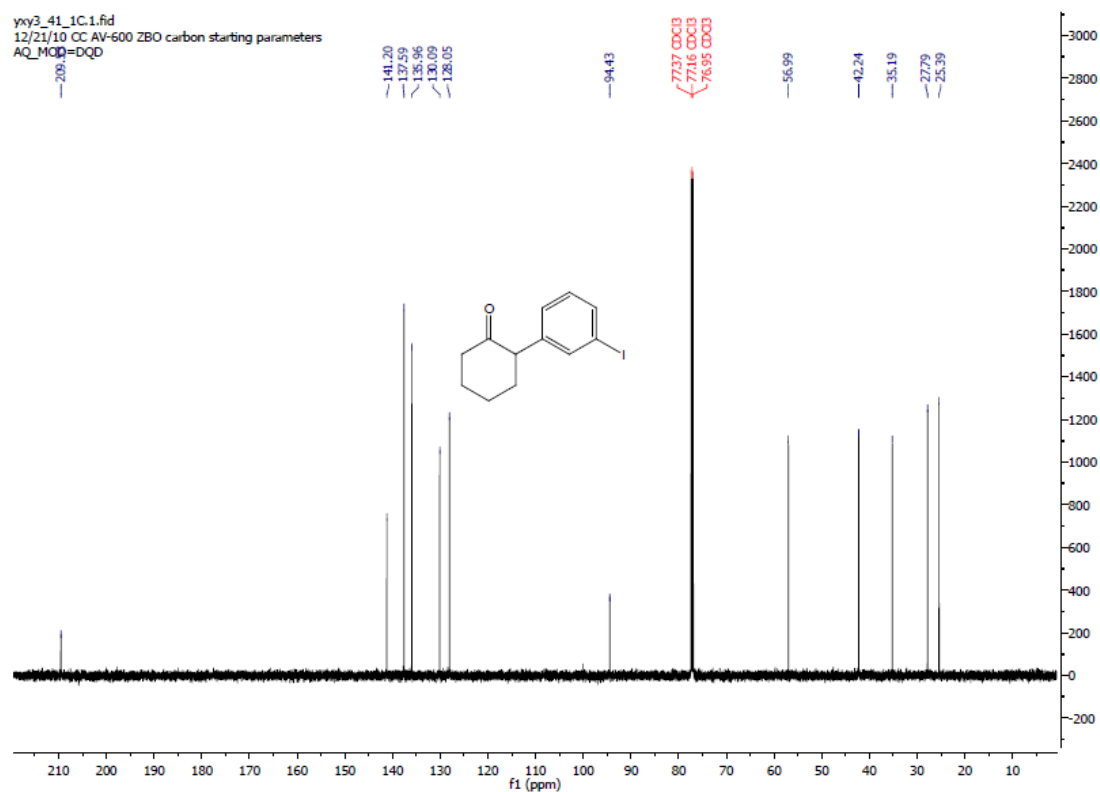

2-(2-methylprop-1-en-1-yl)cyclohexanone (**1o**)

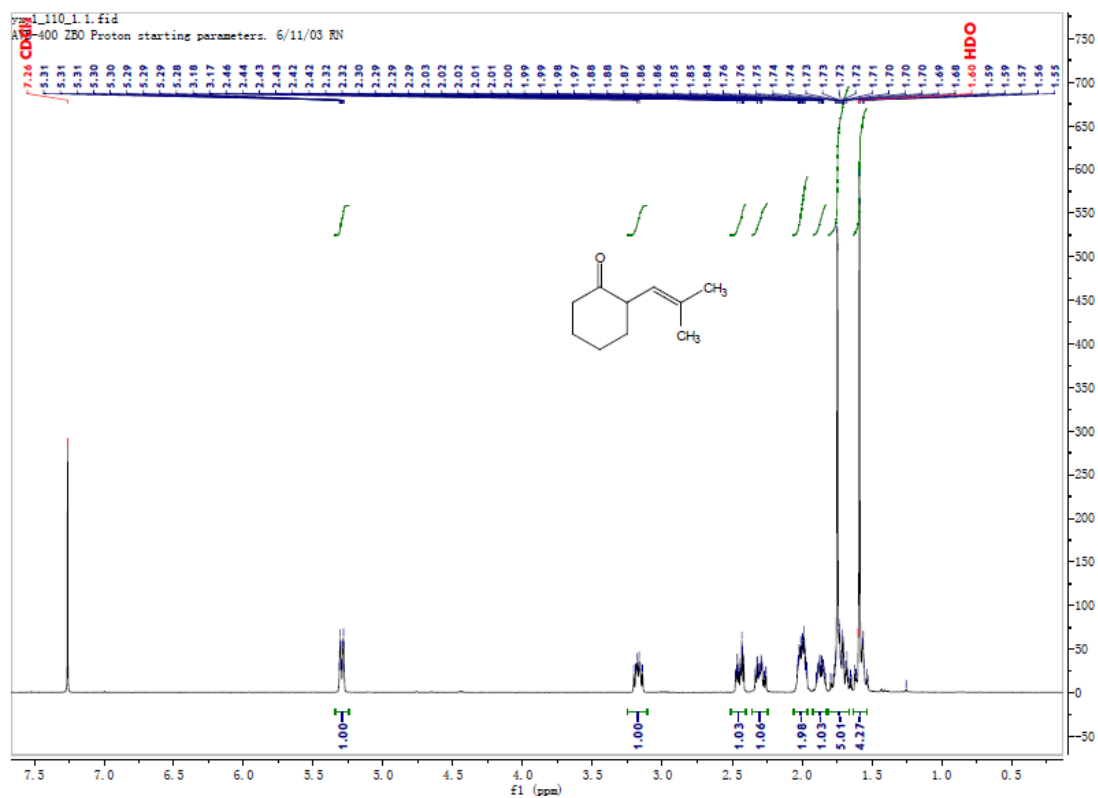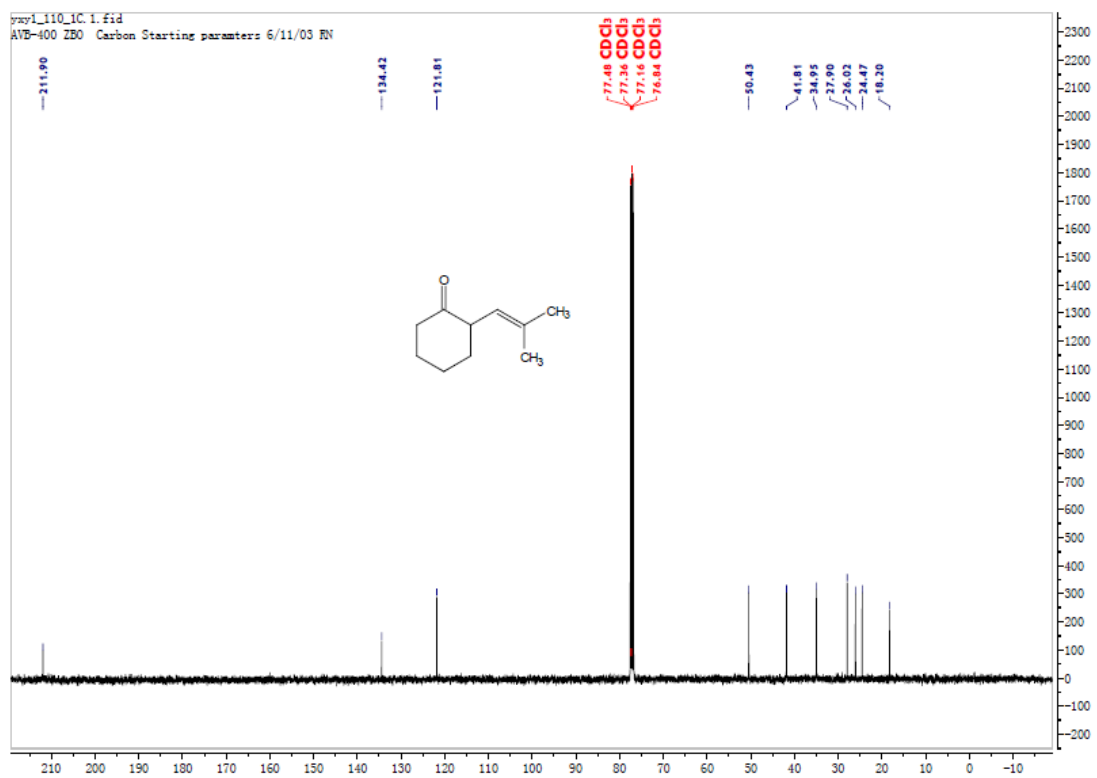

# 2-(phenylethynyl)cyclohexanone (**1p**)

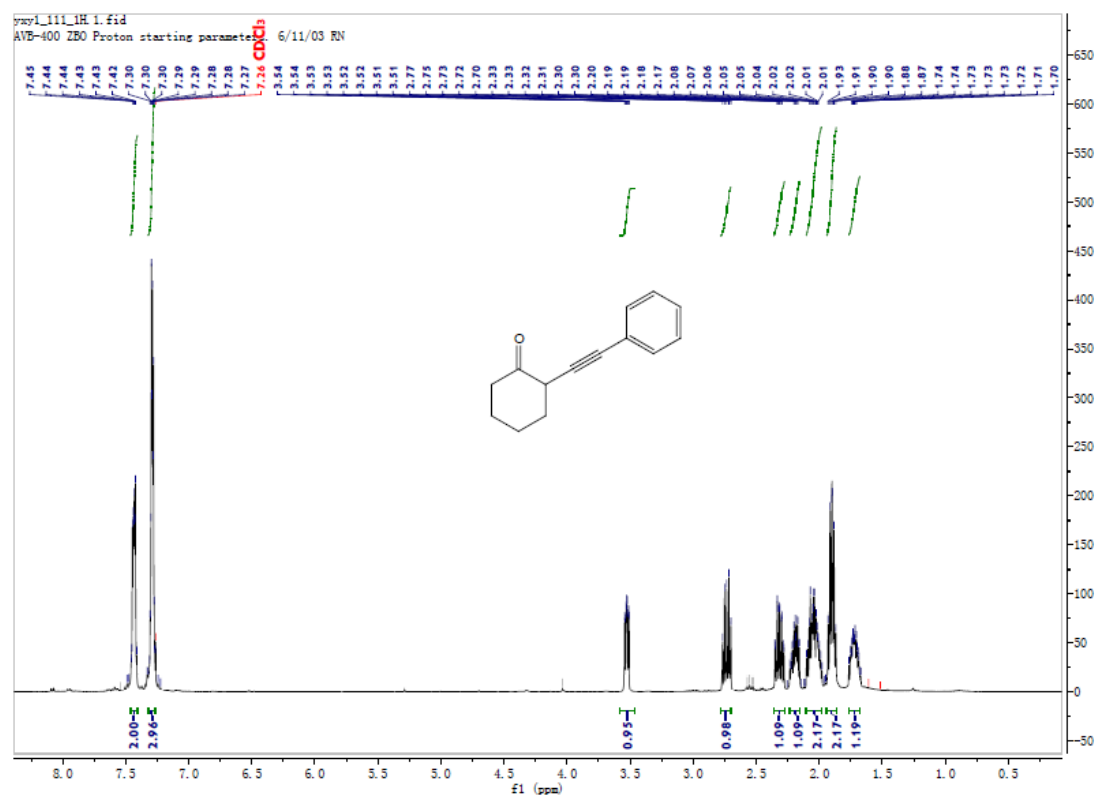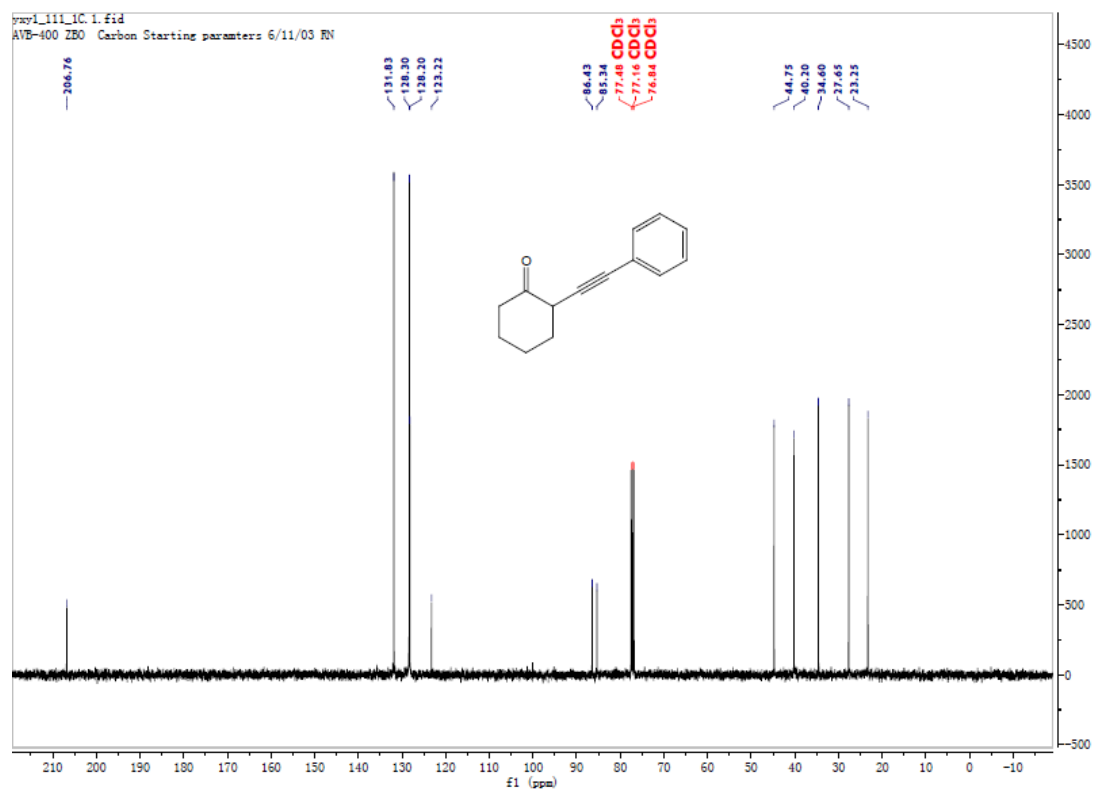

2-(hex-1-yn-1-yl)cyclohexanone (**1q**)

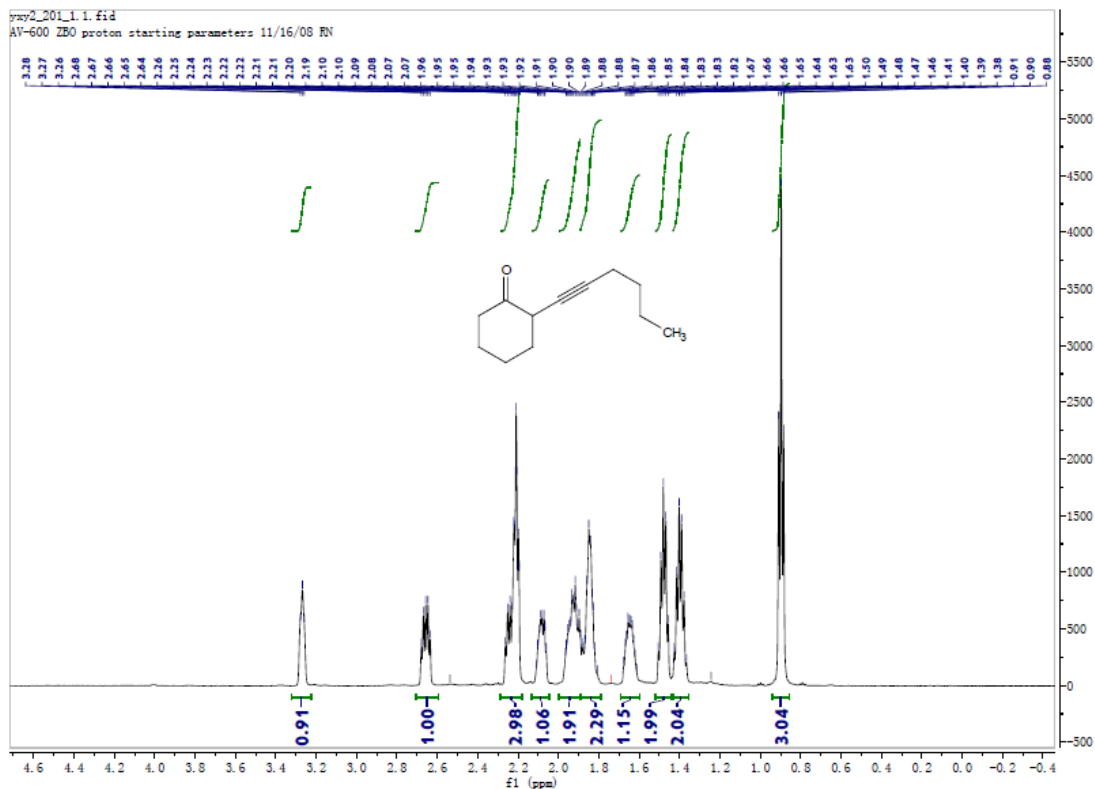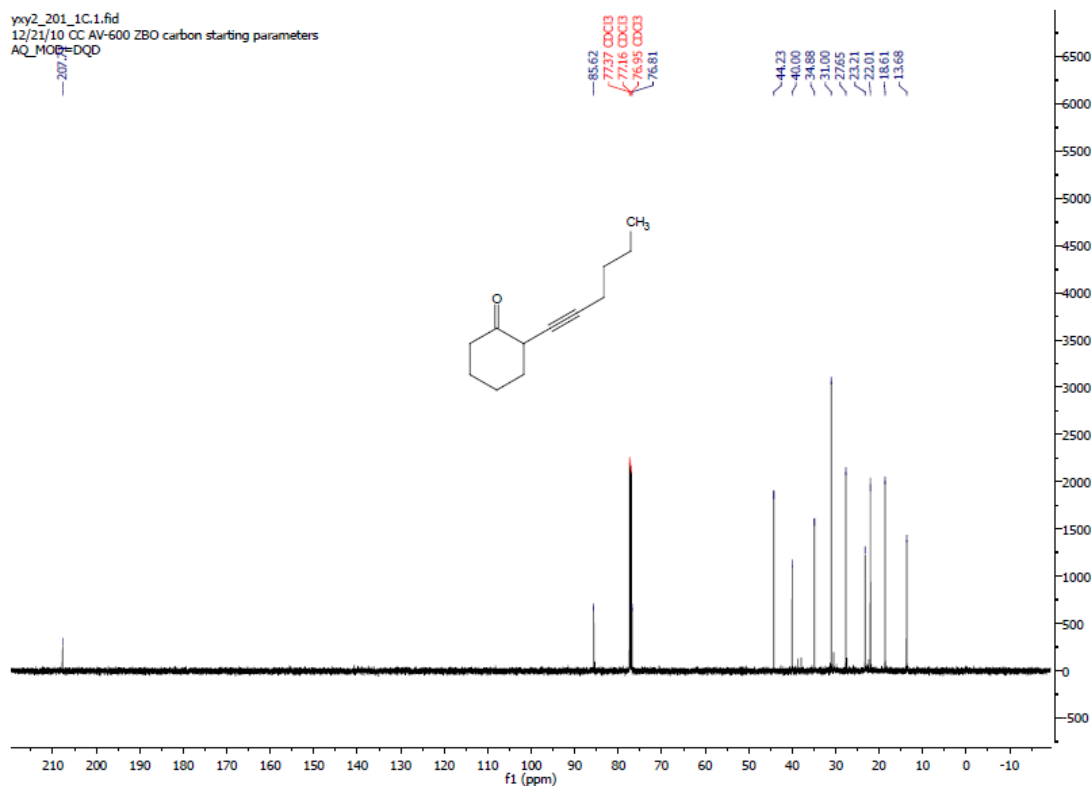

(R)-2-fluoro-2-phenylcyclohexanone (**2a**)

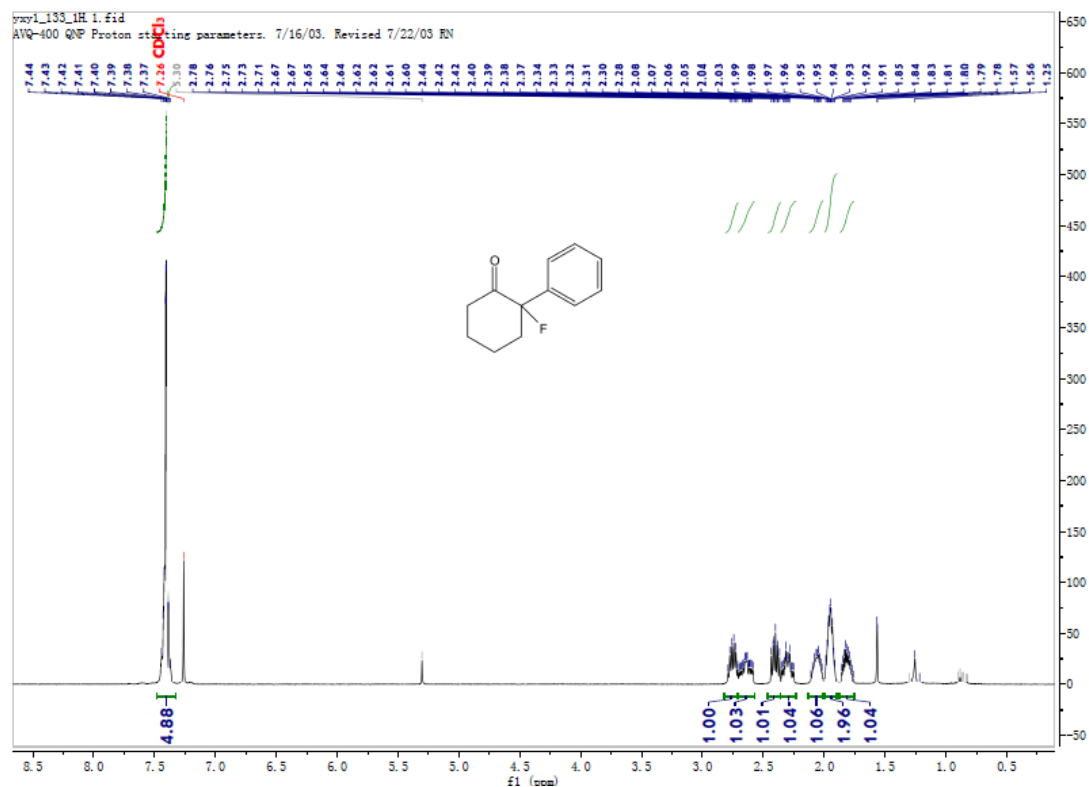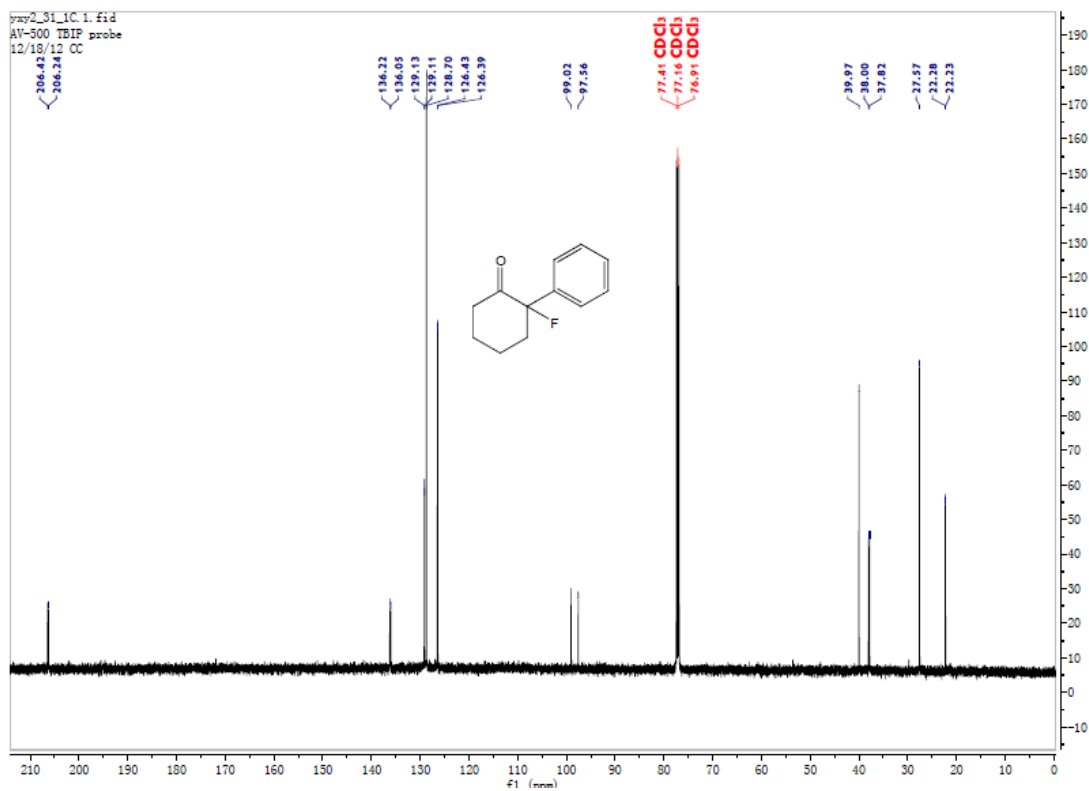



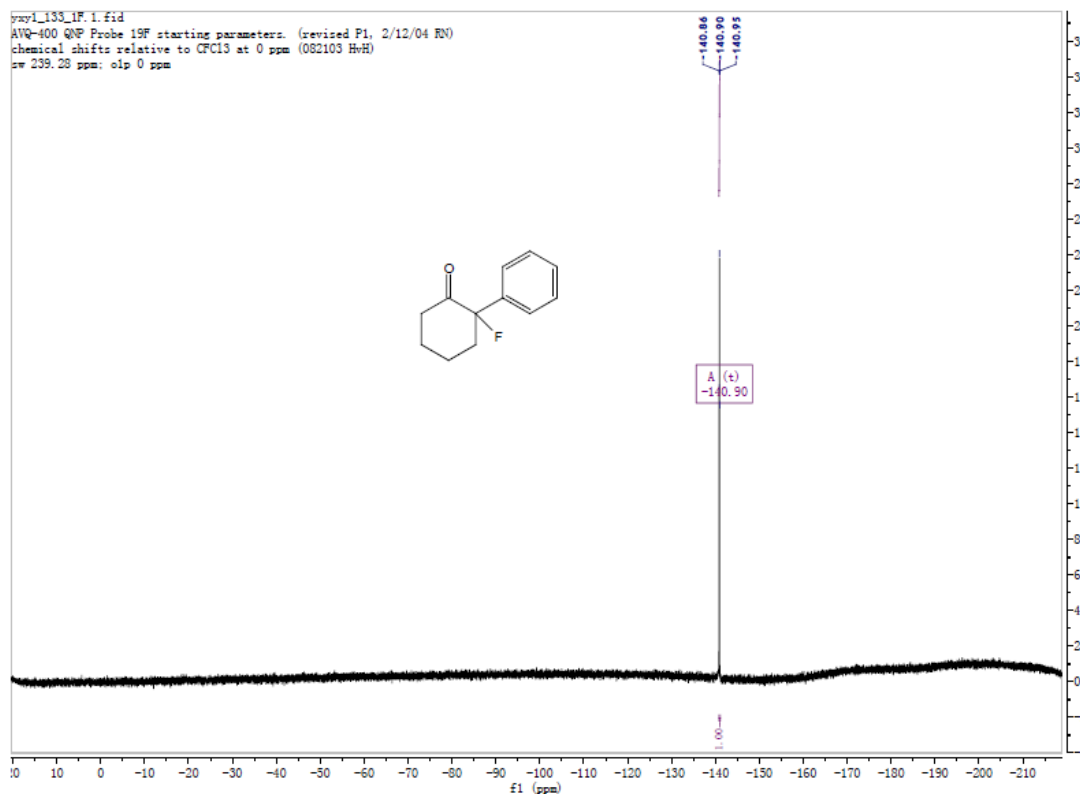

(*R*)-2-fluoro-2-(naphthalen-2-yl)cyclohexanone (**2b**)

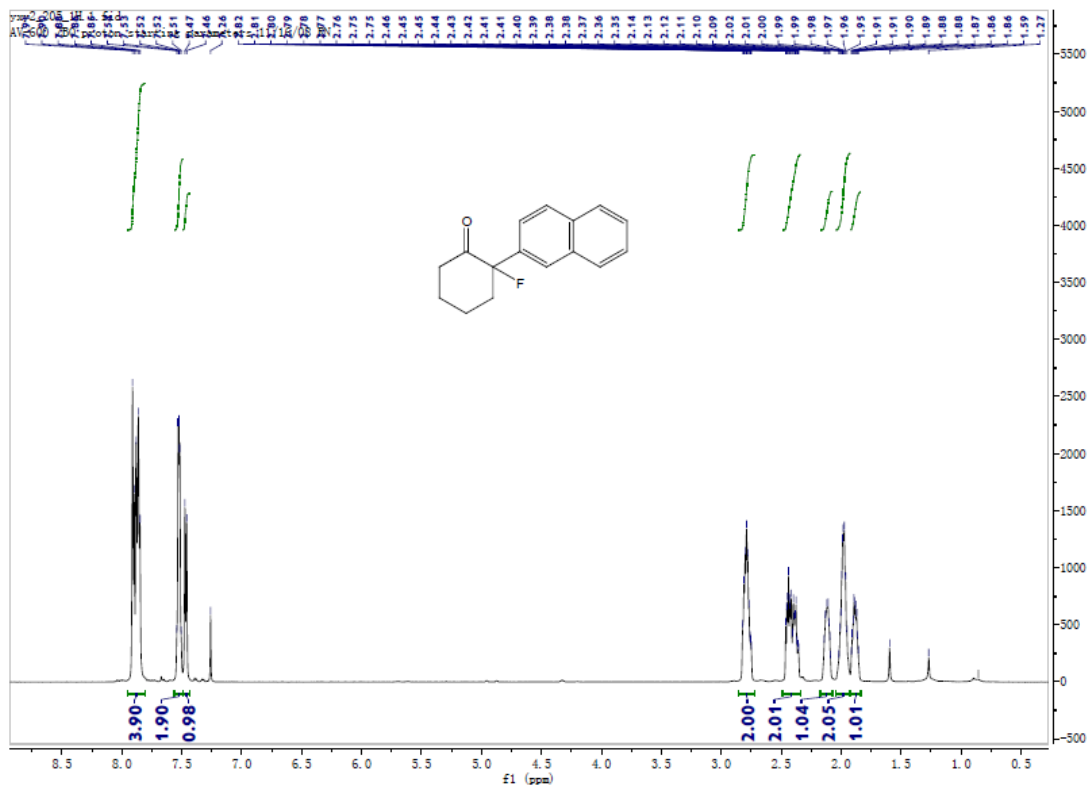

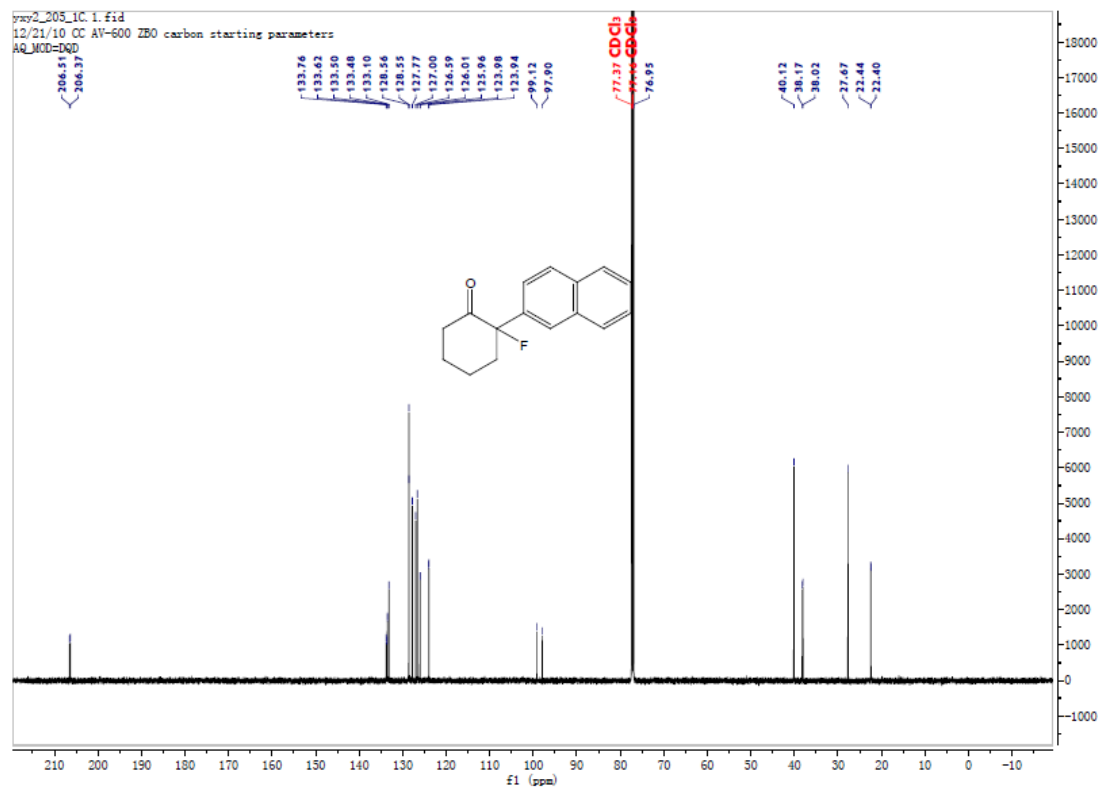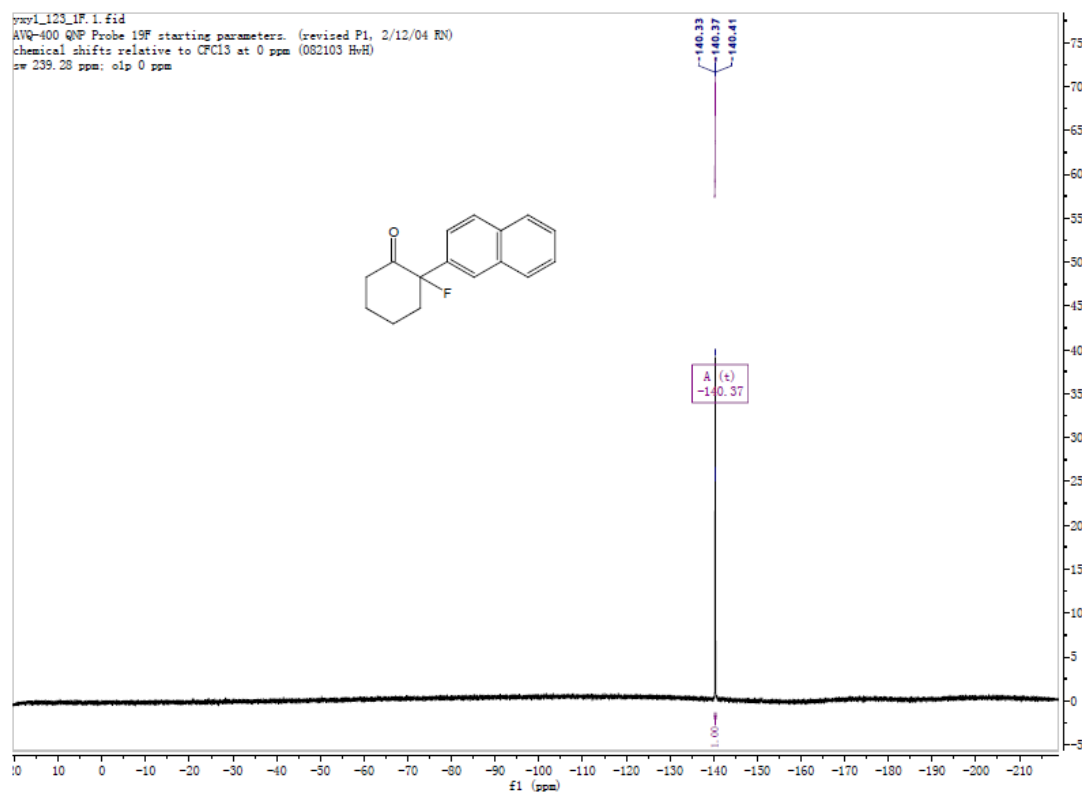

(R)-2-fluoro-2-(p-tolyl)cyclohexanone (**2c**)

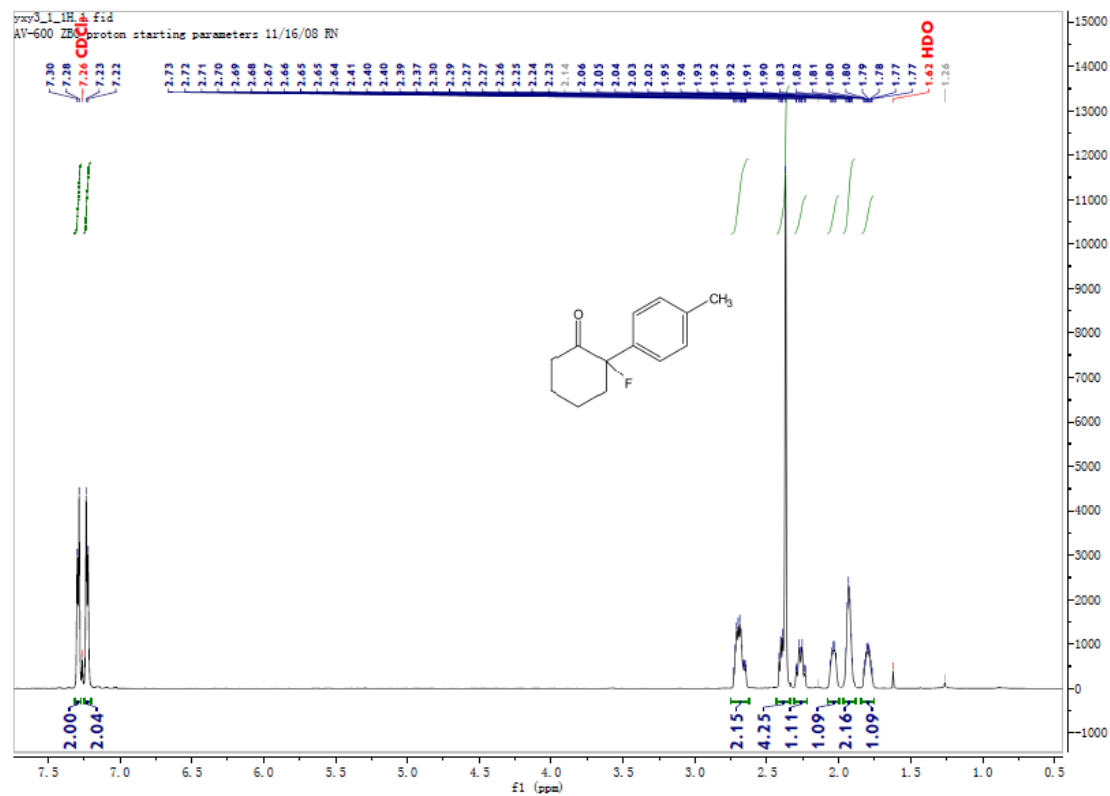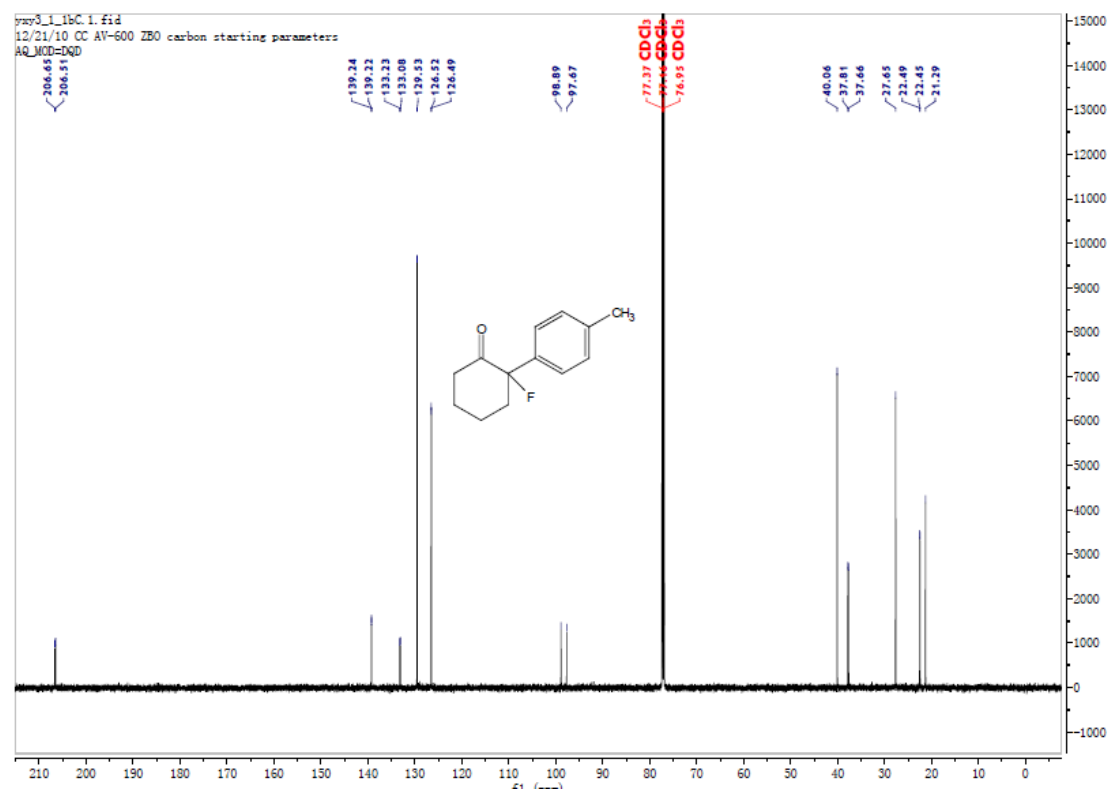

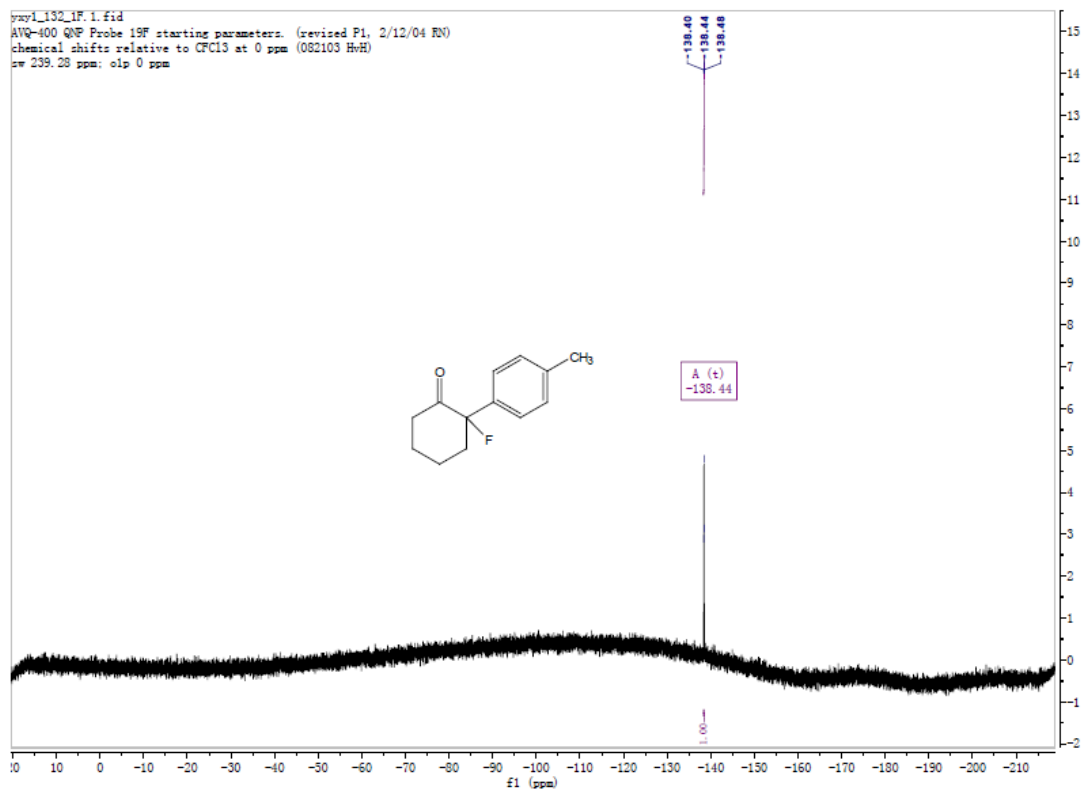

(*R*)-2-(4-chlorophenyl)-2-fluorocyclohexanone (**2d**)

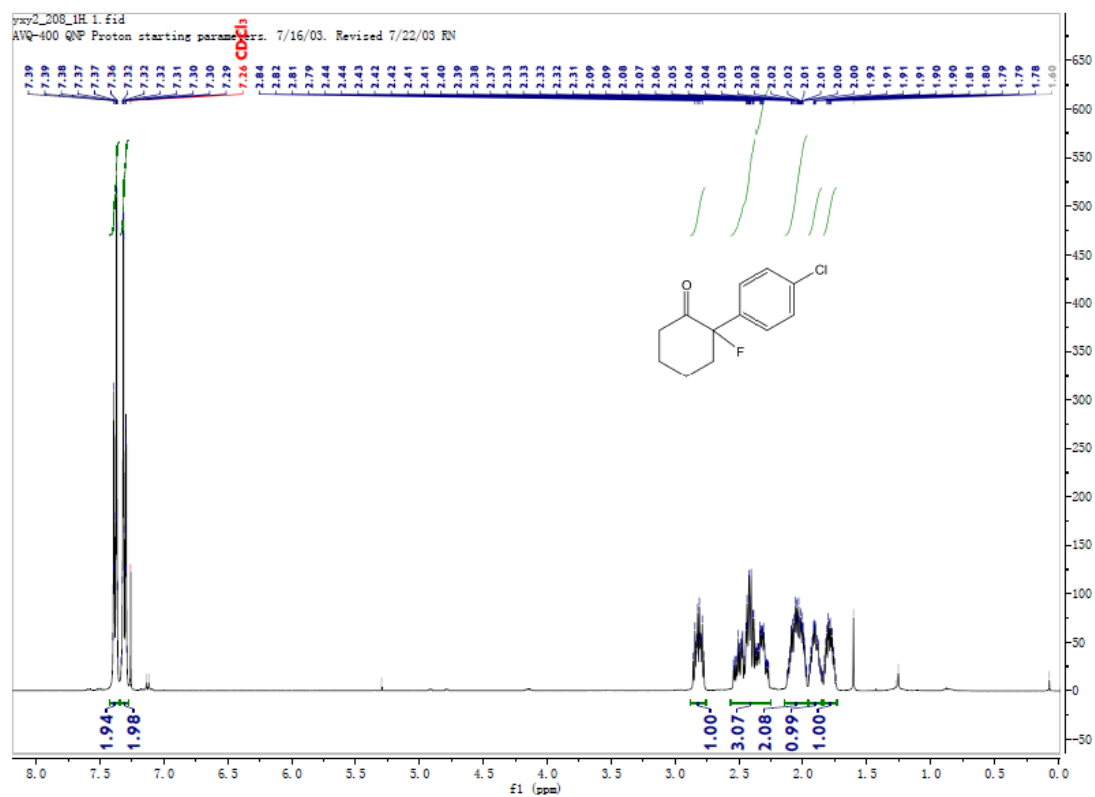

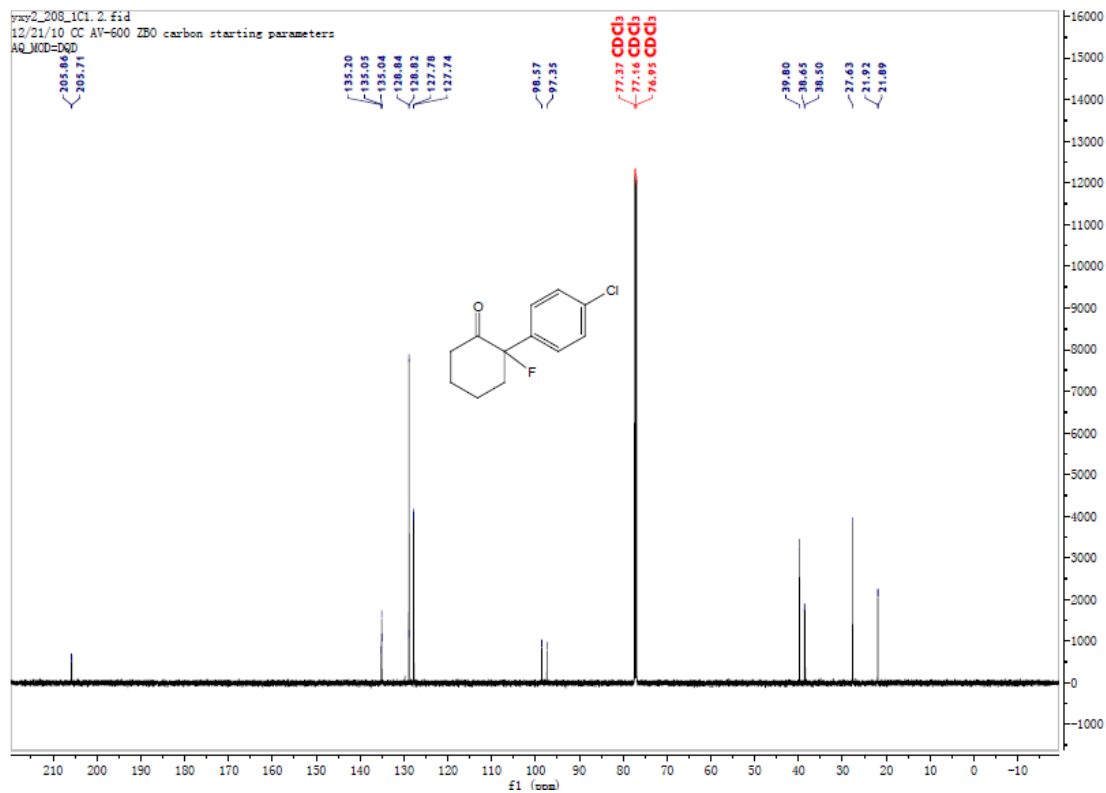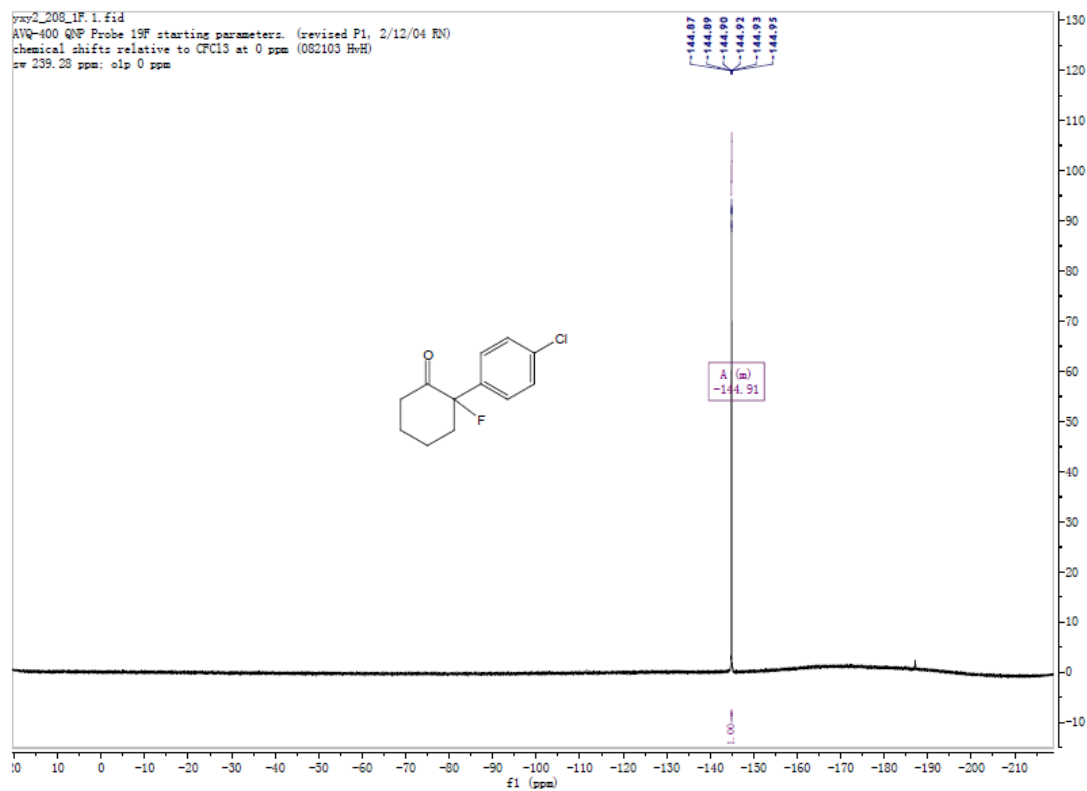

(R)-2-(4-bromophenyl)-2-fluorocyclohexanone (2e)

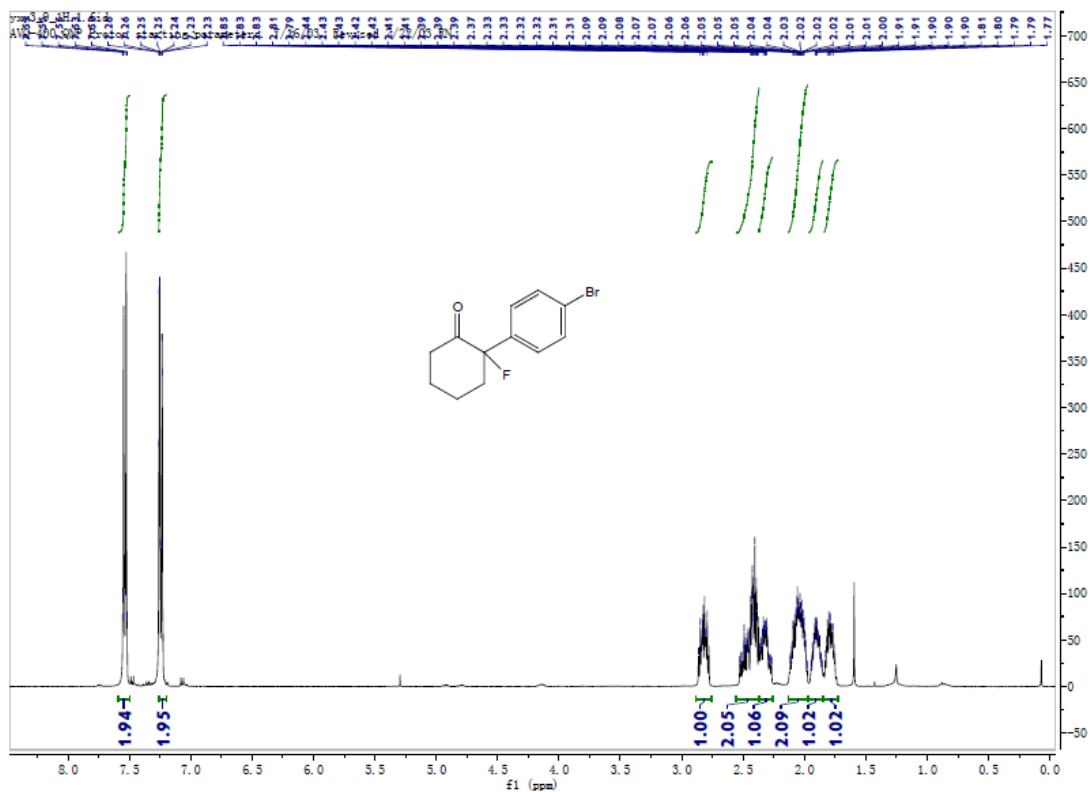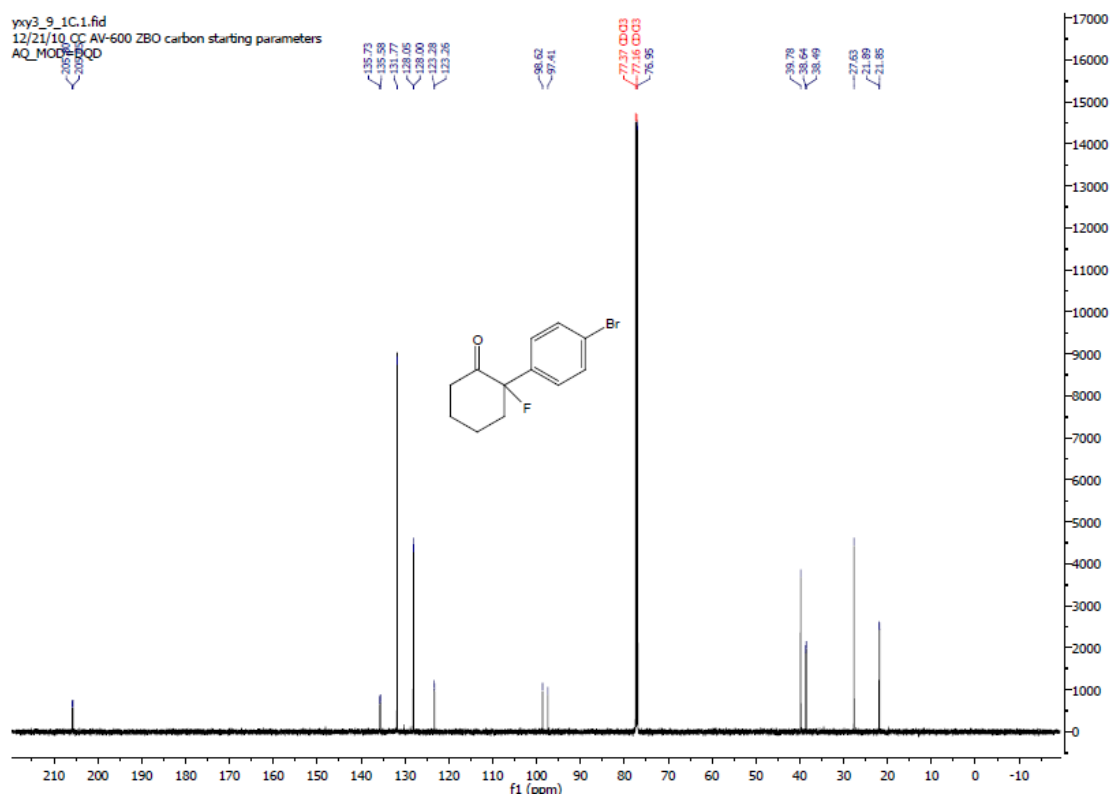

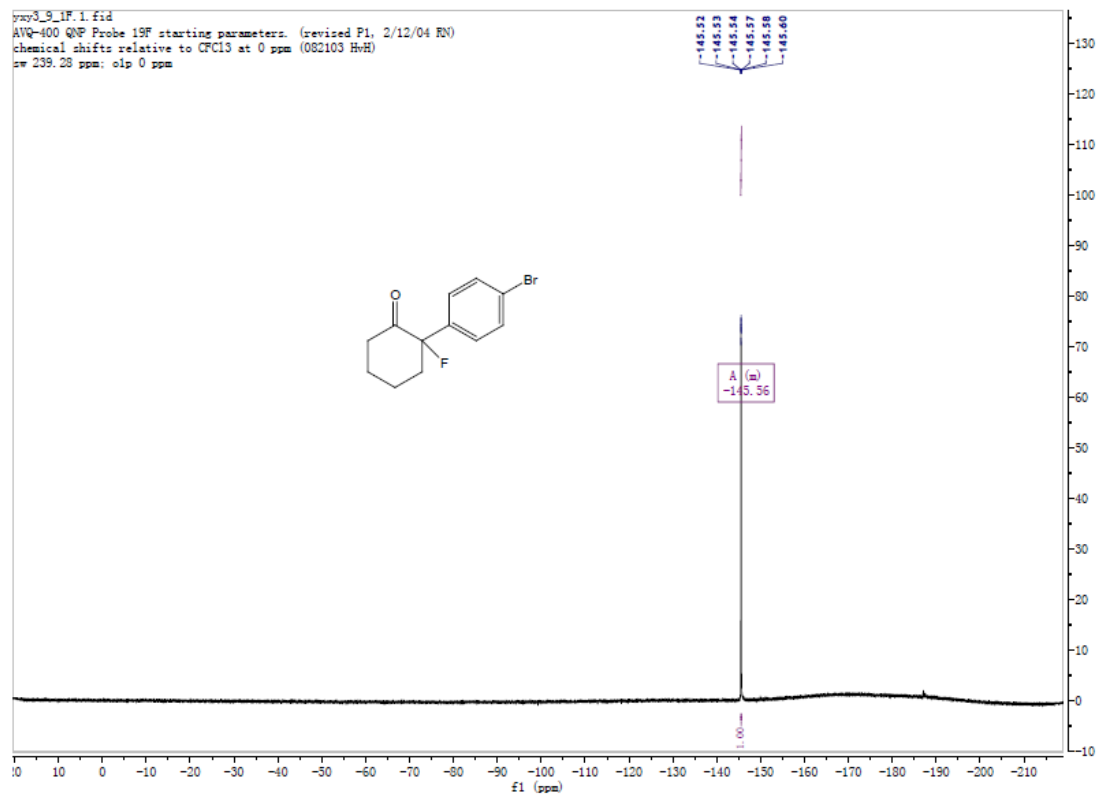

(*R*)-2-fluoro-2-(*m*-tolyl)cyclohexanone (**2f**)

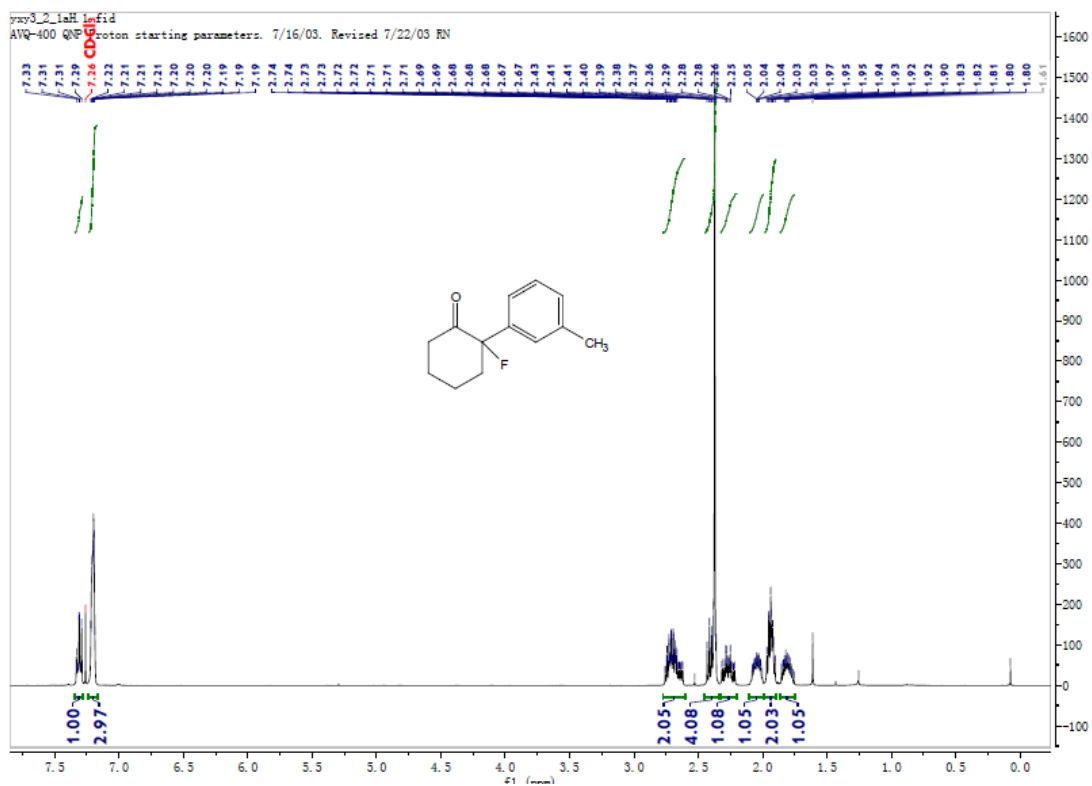

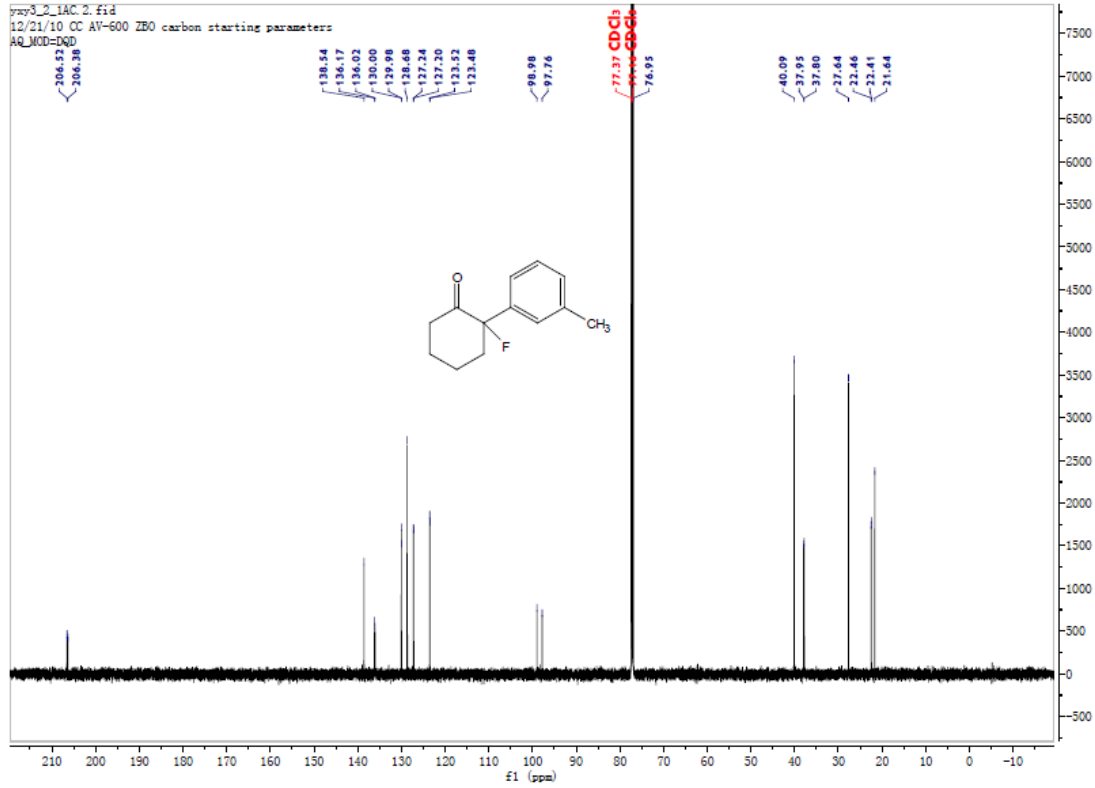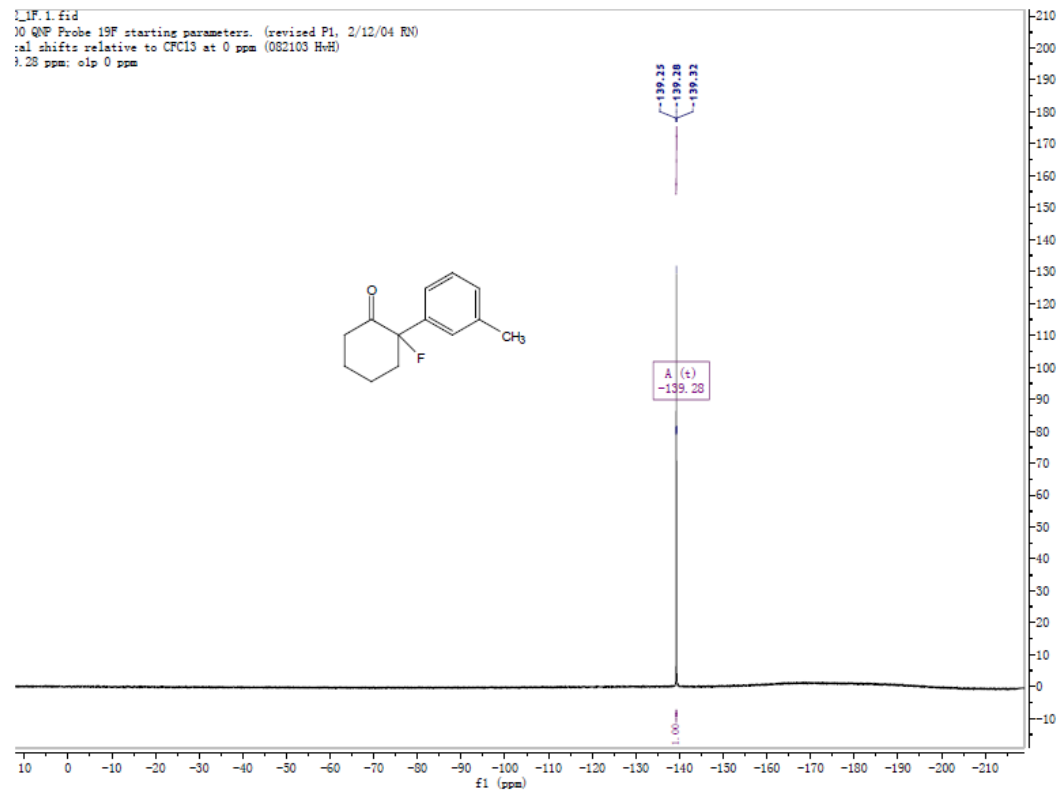



(R)-2-(3-bromophenyl)-2-fluorocyclohexanone (**2g**)

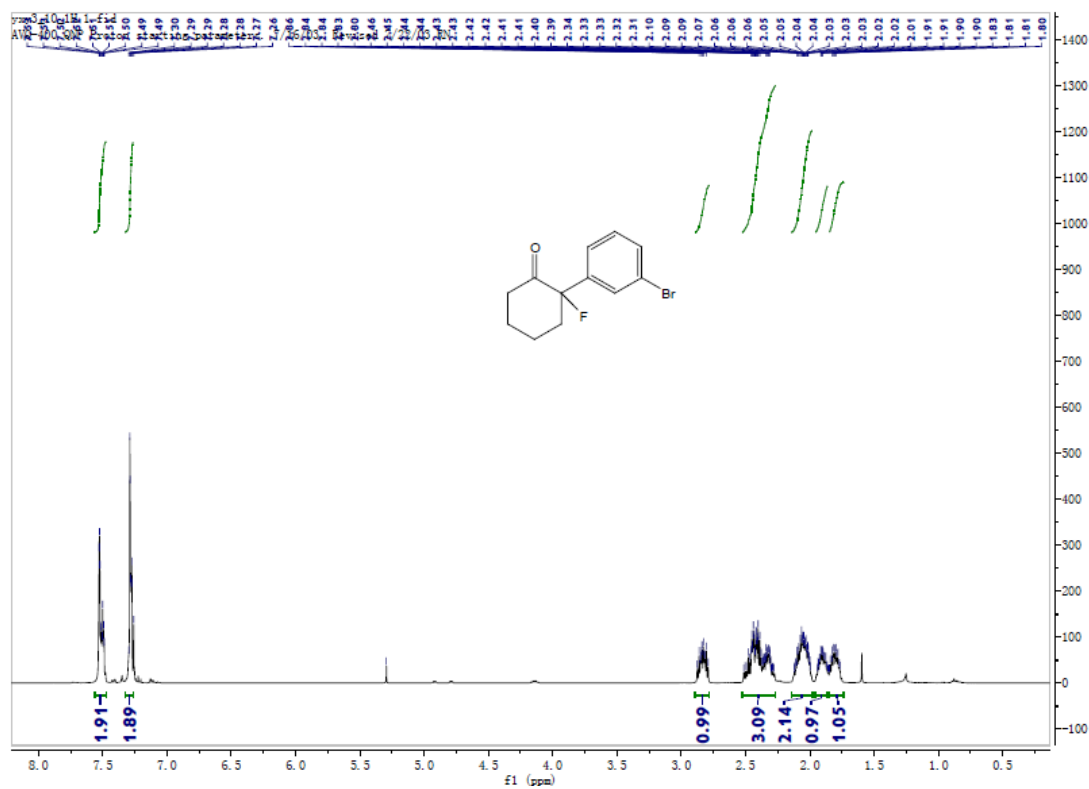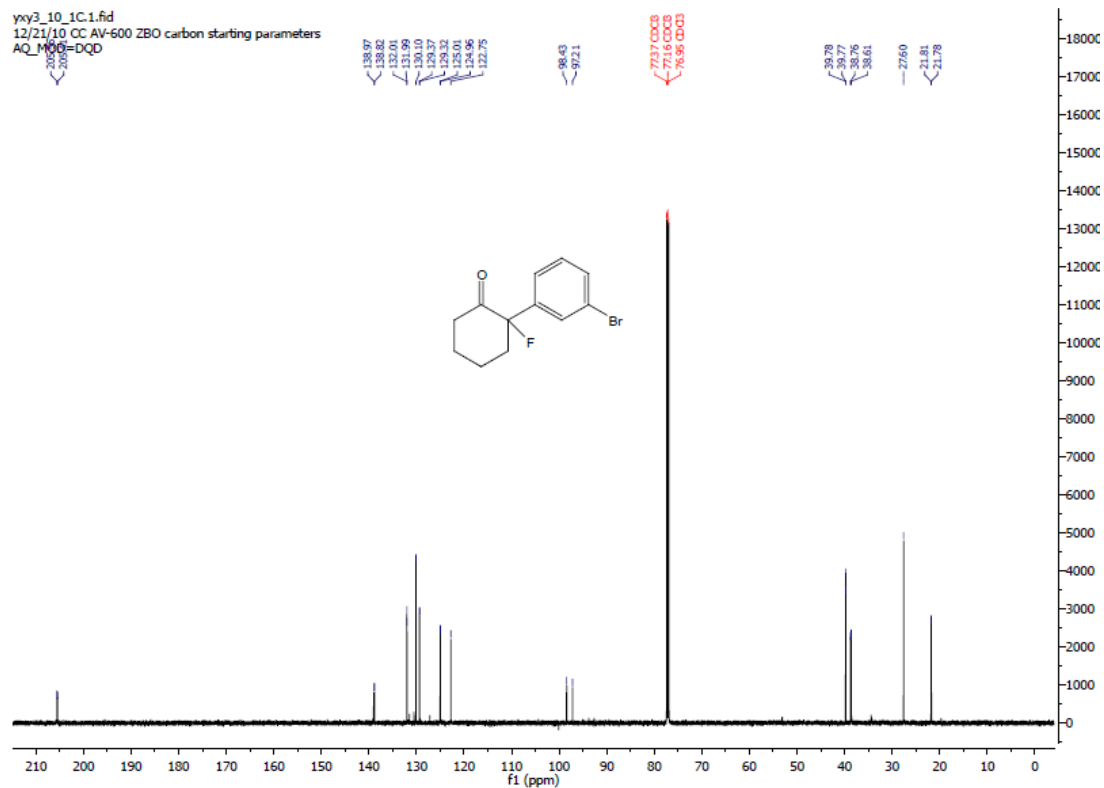

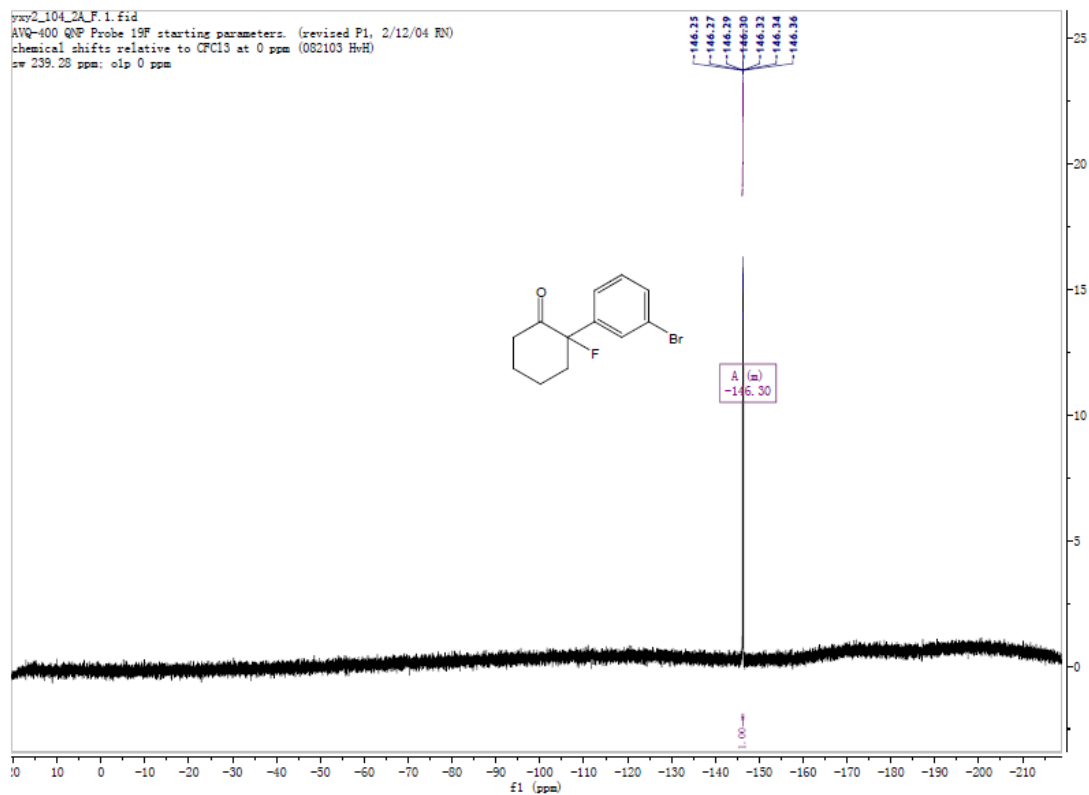

(*R*)-2-fluoro-2-(3-methoxyphenyl)cyclohexanone (**2h**)

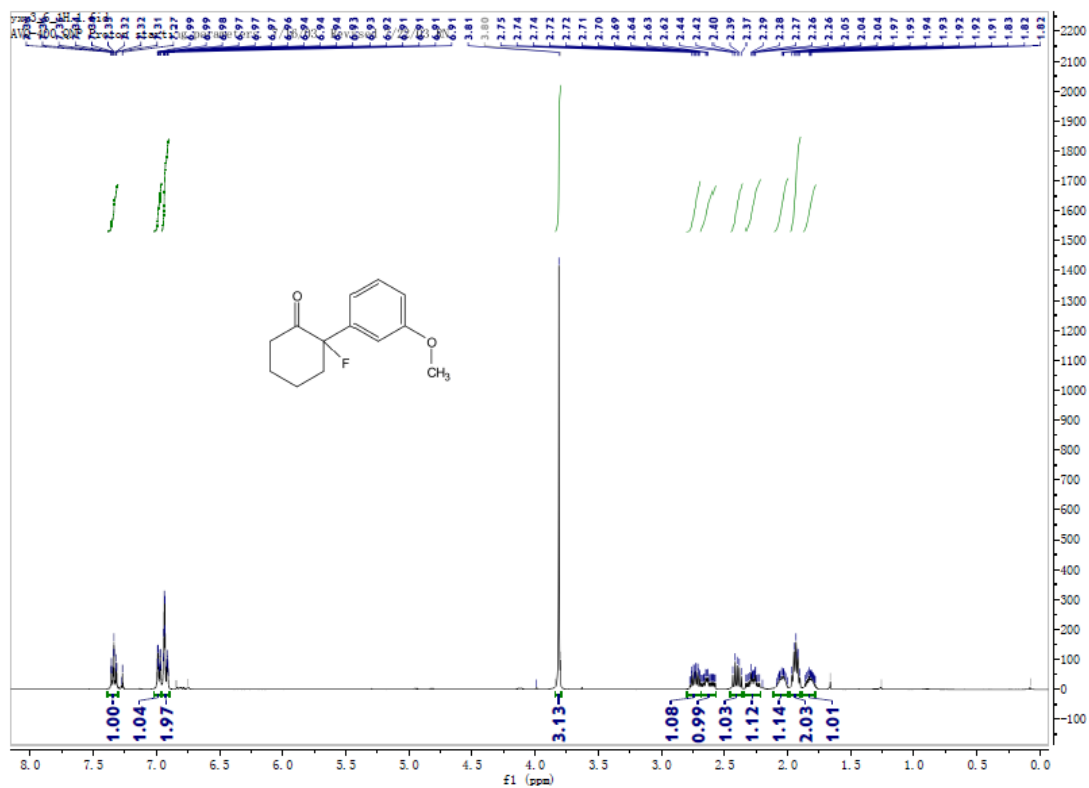

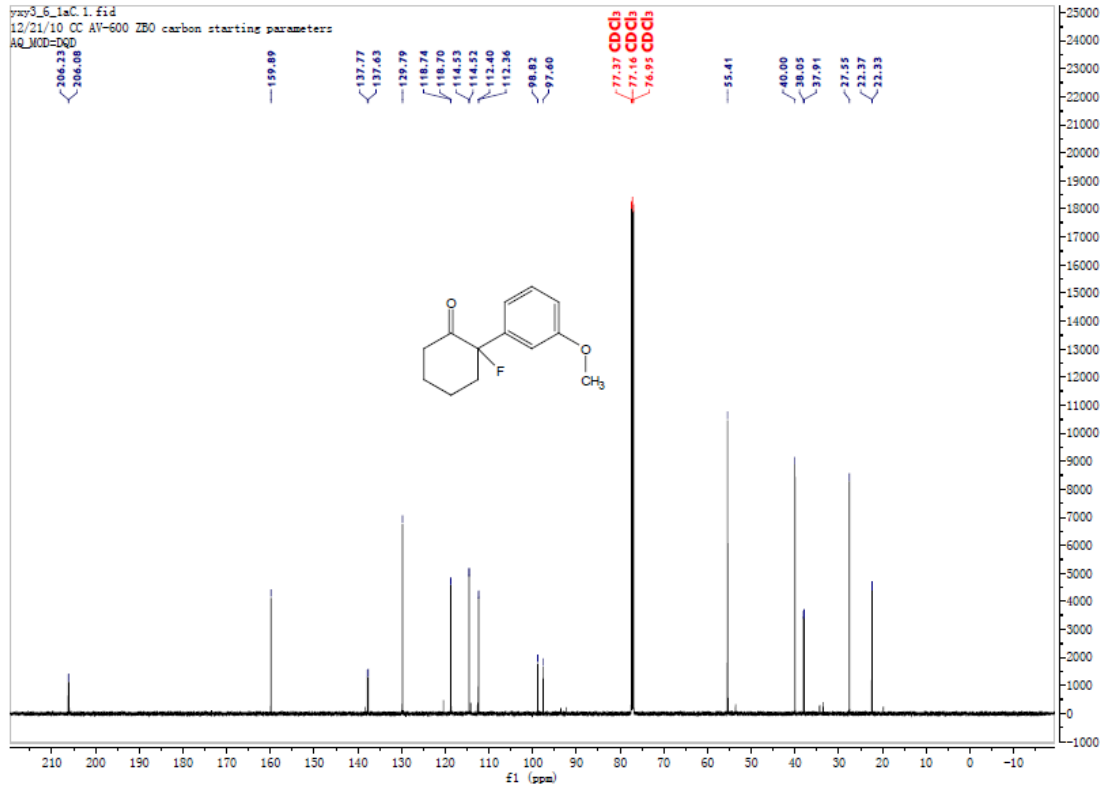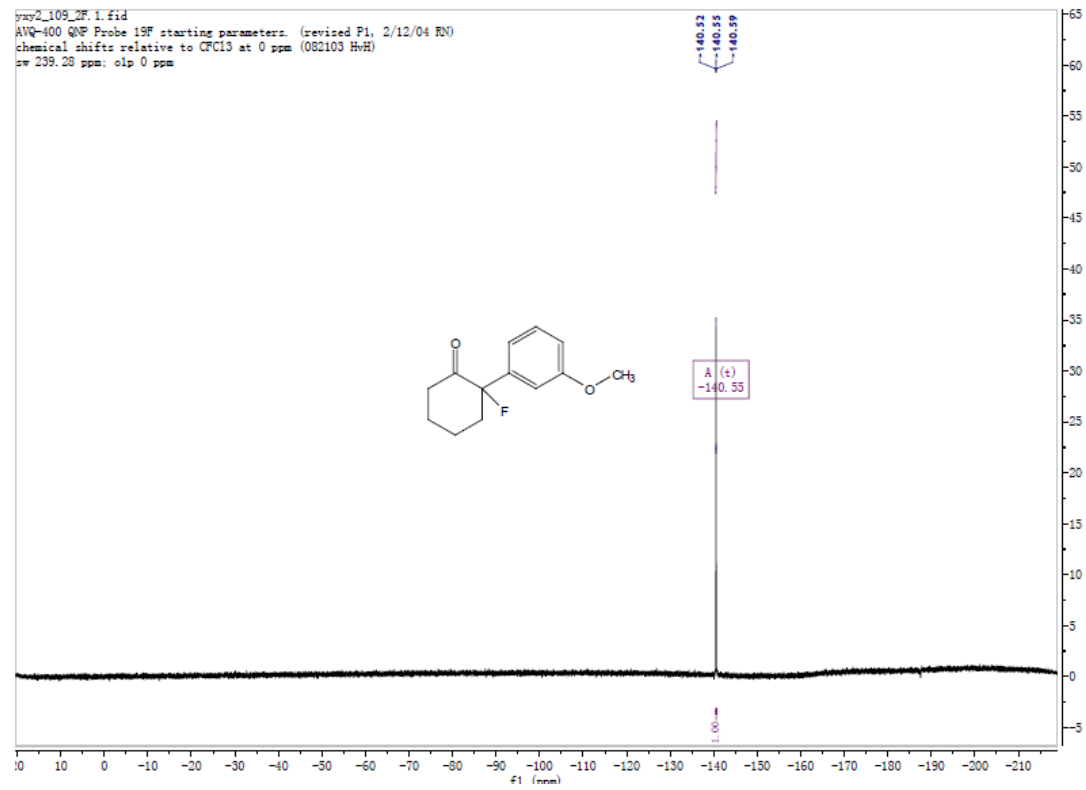

(*R*)-2-fluoro-2-(furan-3-yl)cyclohexanone (**2i**)

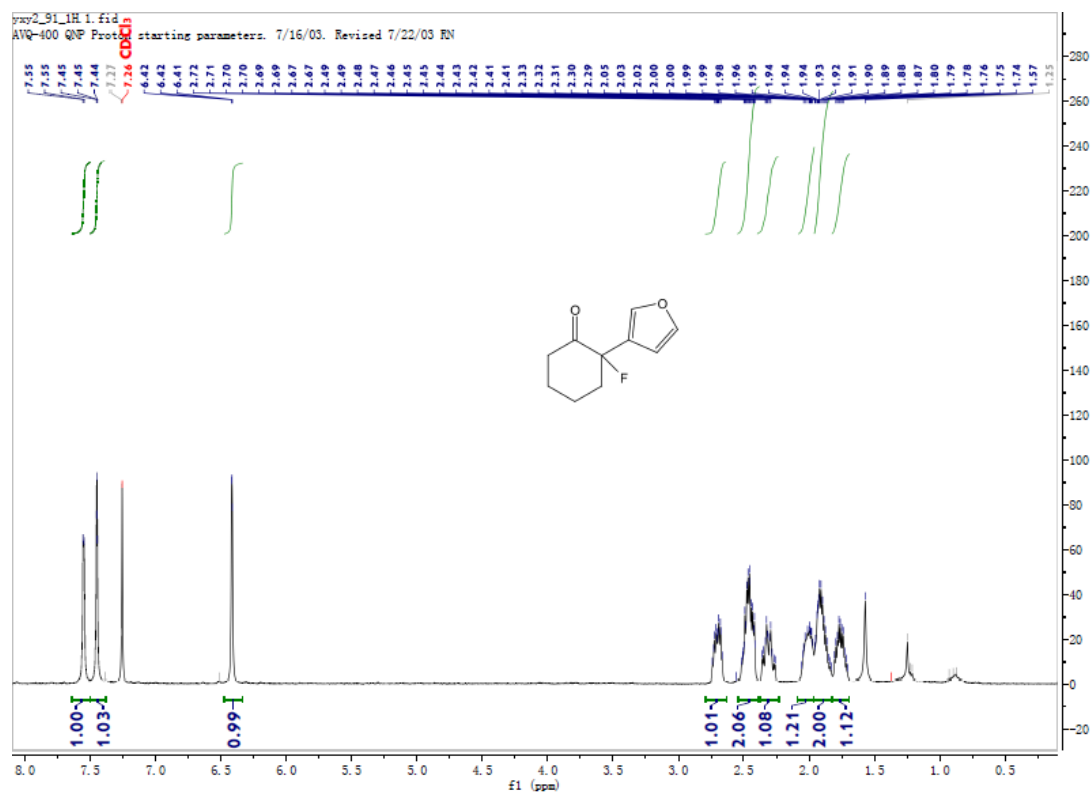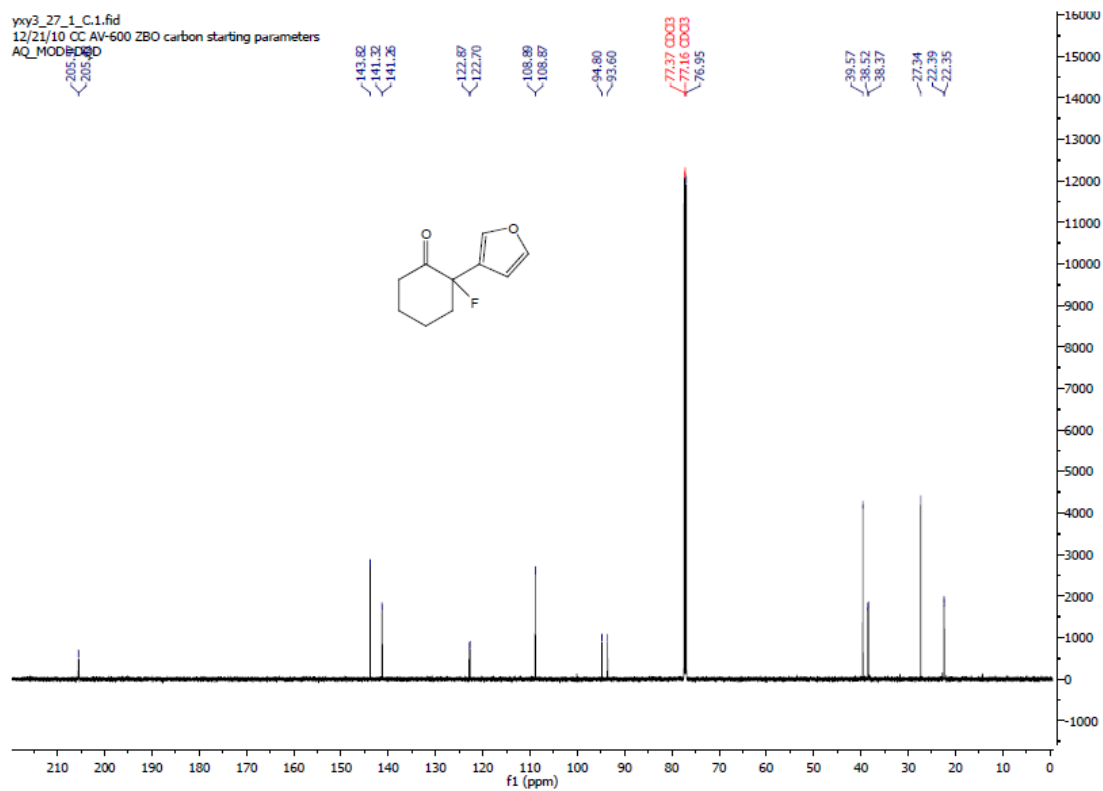

xyy3\_27\_1F1.fid  
 AVQ-400 QNP Probe 19F starting parameters. (revised P1, 2/12/04 RN)  
 chemical shifts relative to CFC13 at 0 ppm (082103 HvH)  
 sw 239.28 ppm; o1p 0 ppm

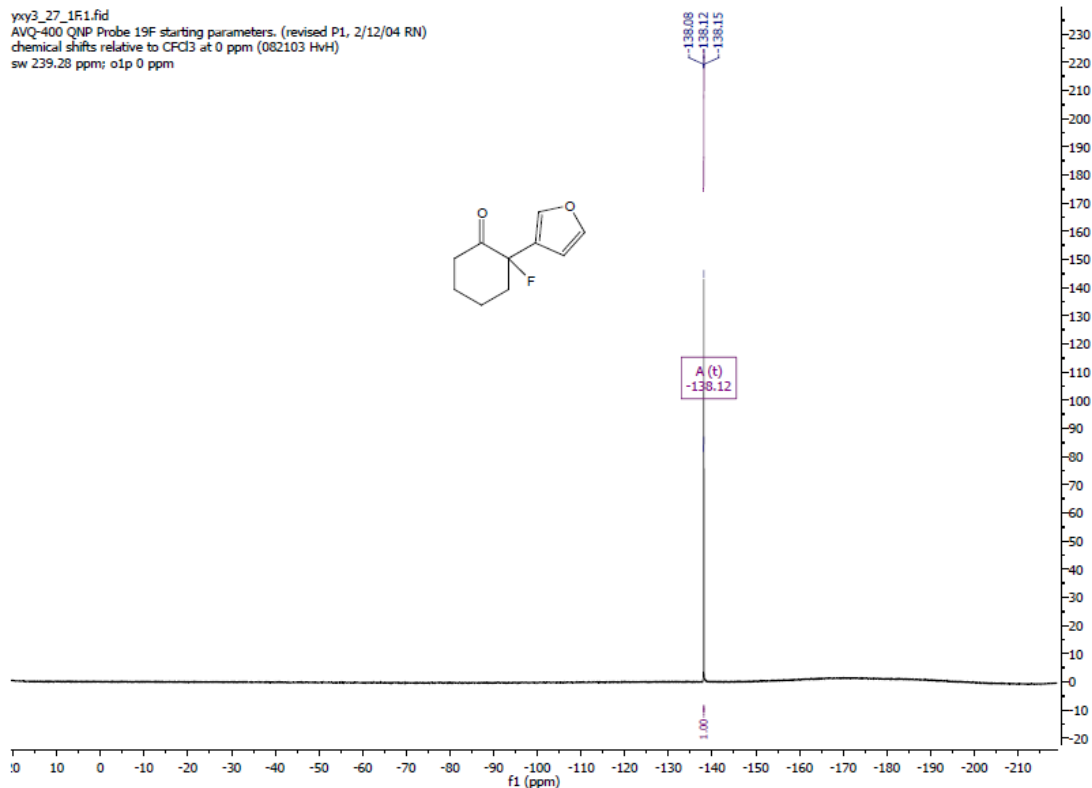

(R)-2-fluoro-2-(3-iodophenyl)cyclohexanone (**2j**)

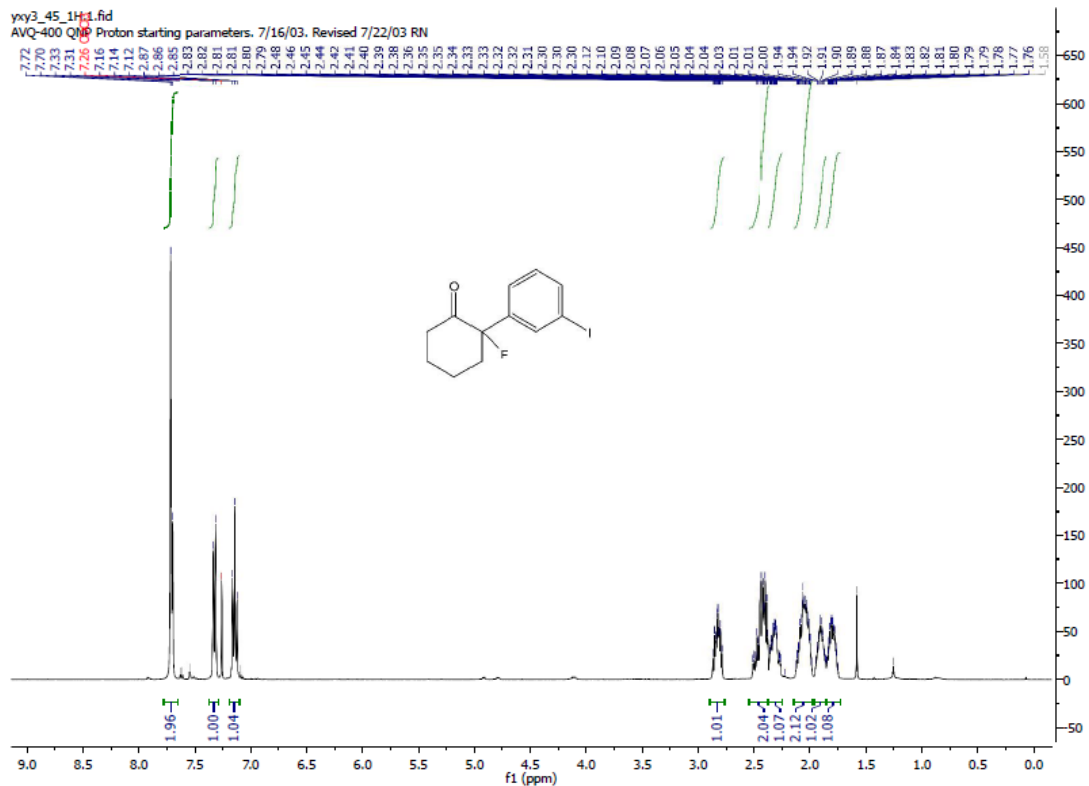

xy3\_45\_1C.1.fid  
12/21/10 CC AV-600 ZBO carbon starting parameters  
AQ\_MOD@000

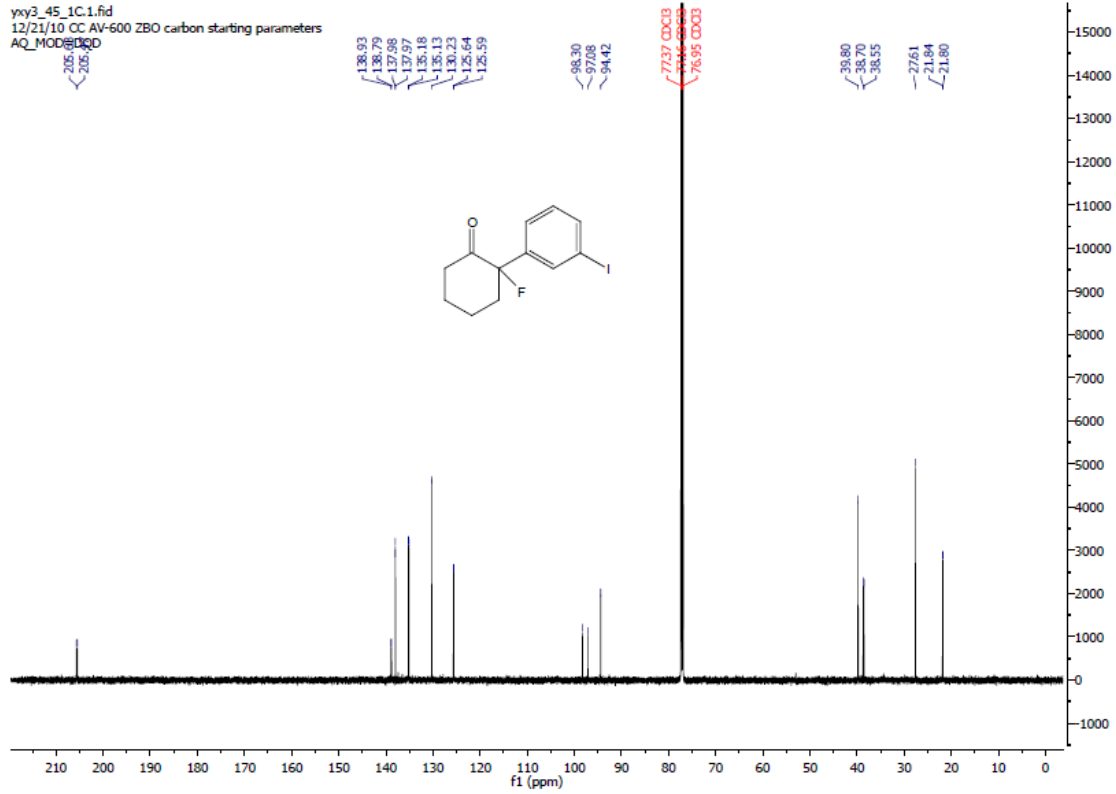

xy3\_45\_1F.1.fid  
AVQ-400 QNP Probe 19F starting parameters. (revised P1, 2/12/04 RN)  
chemical shifts relative to CFCl3 at 0 ppm (082103 HvH)  
sw 239.28 ppm; q1p 0 ppm

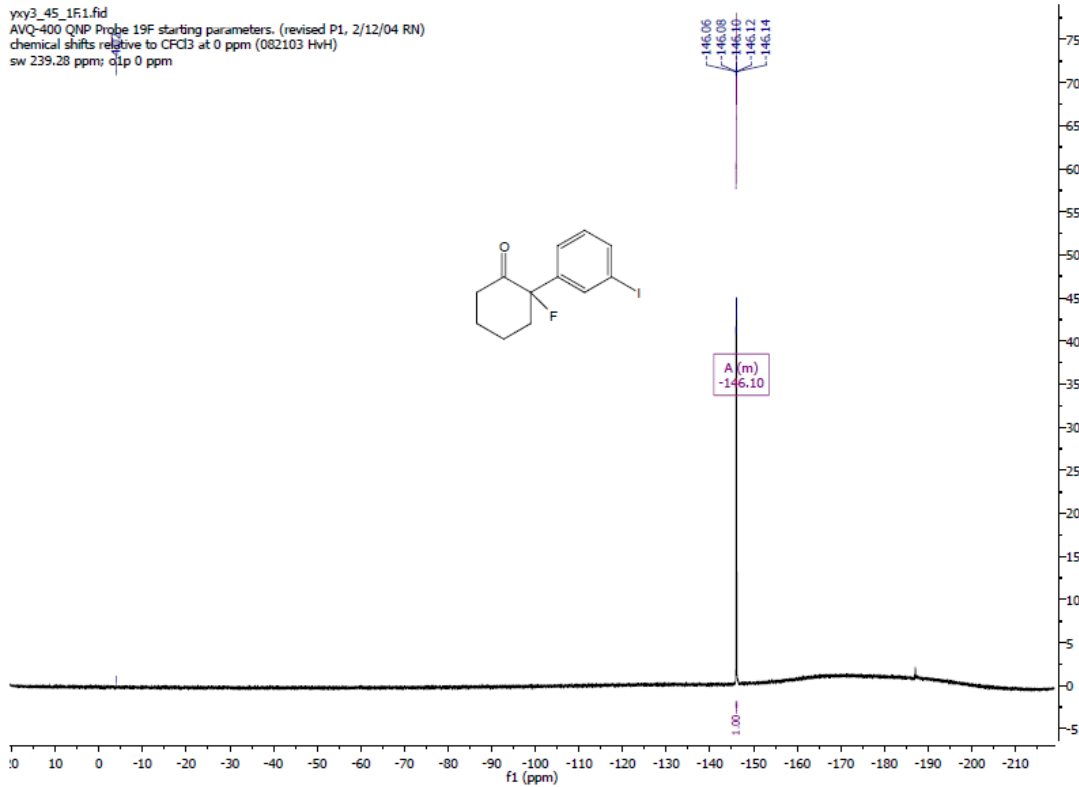

(R)-7-fluoro-7-phenyl-1,4-dioxaspiro[4.5]decan-8-one (2k)

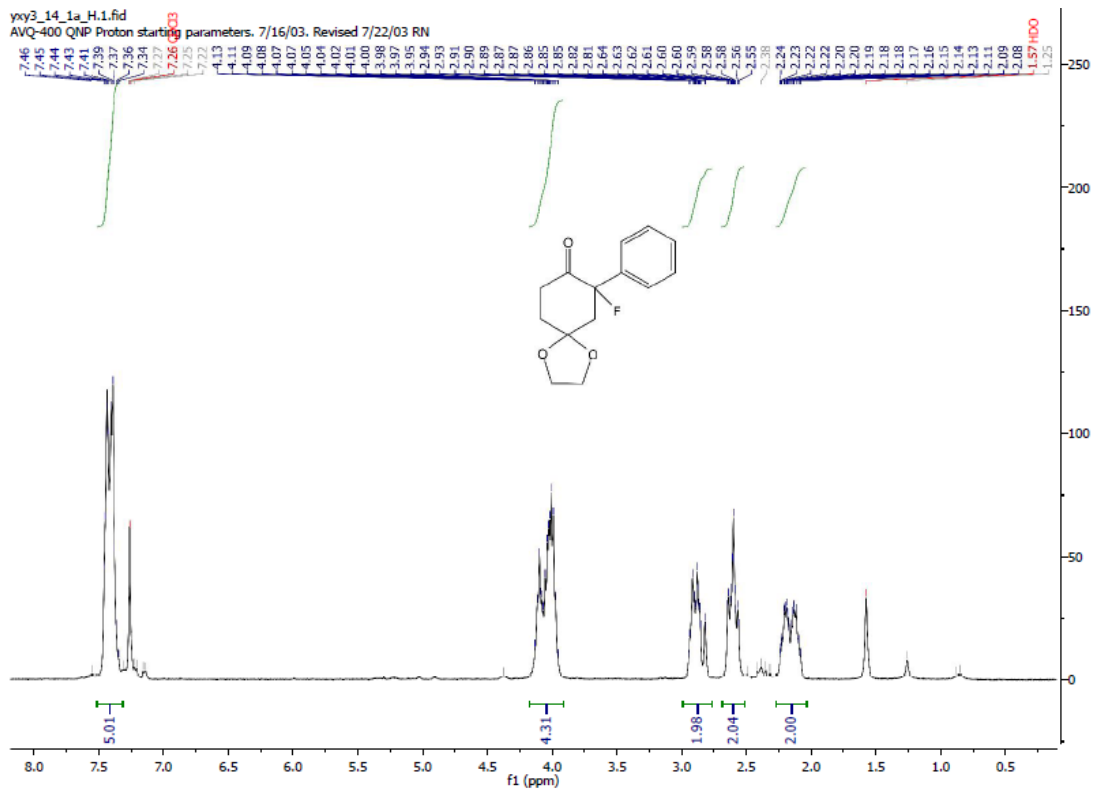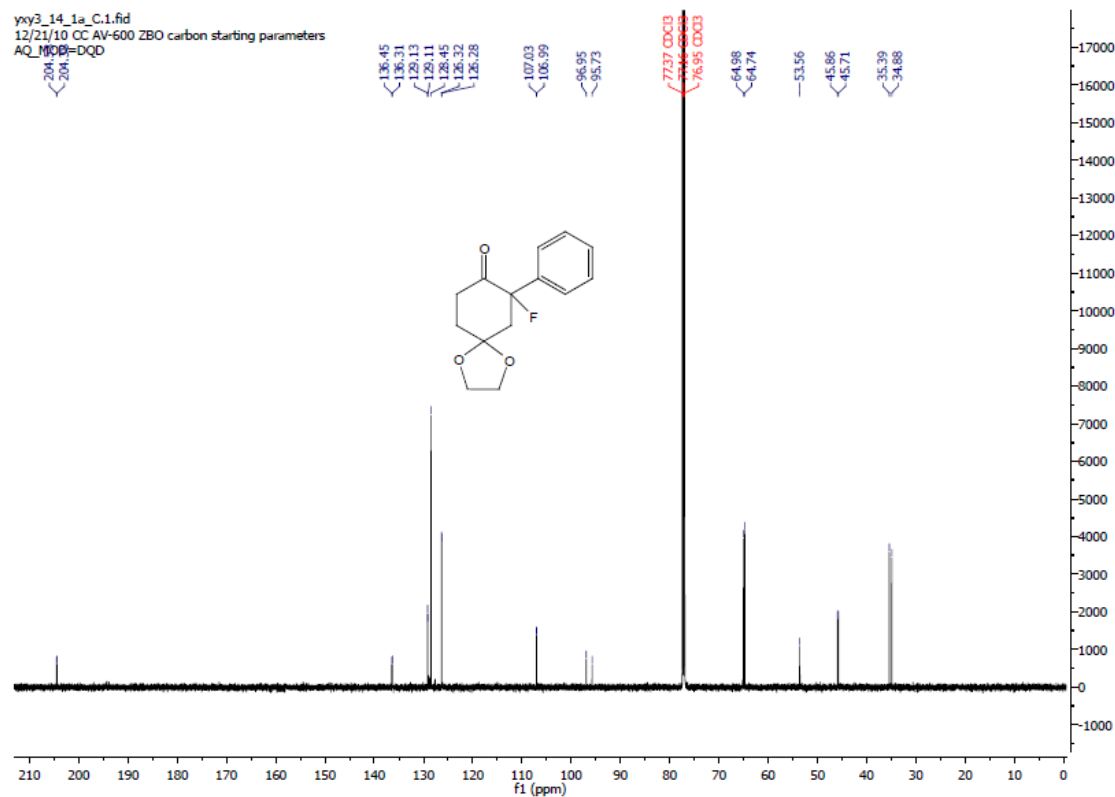

xyy3\_14\_1a\_F1.fid  
 AVQ-400 QNP Probe 19F starting parameters. (revised P1, 2/12/04 RN)  
 chemical shifts relative to CFCl3 at 0 ppm (082103 HvH)  
 sw 239.28 ppm; o1p 0 ppm

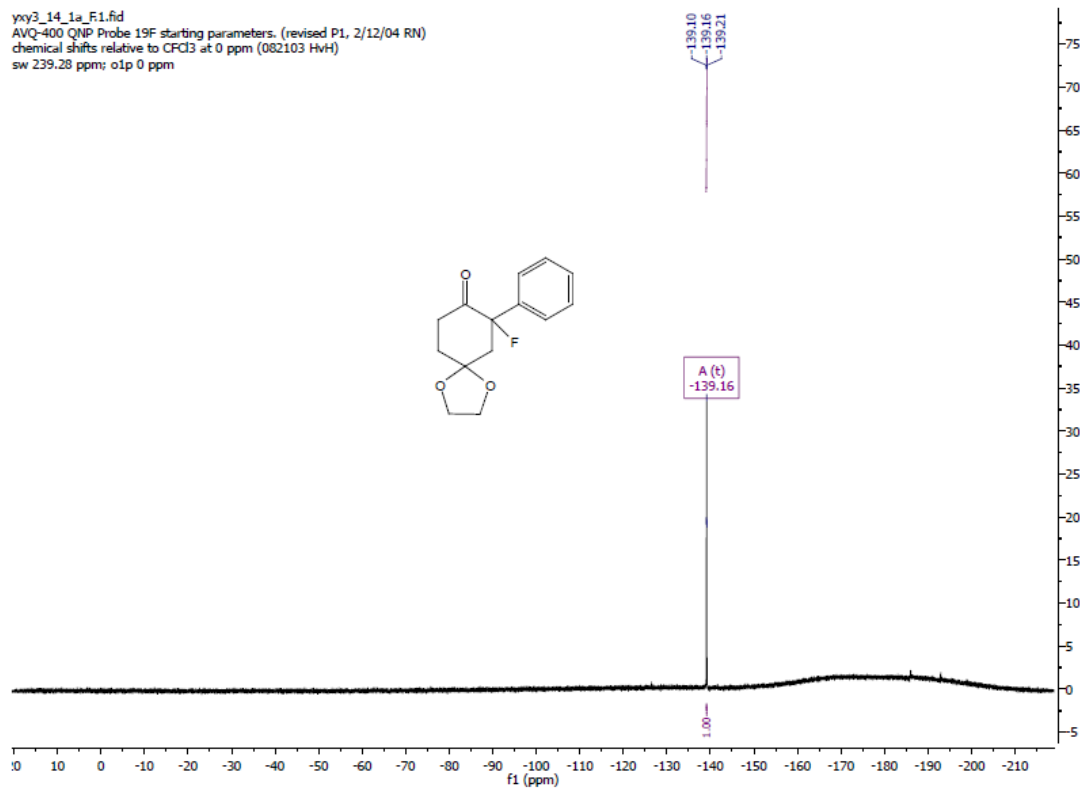

(S)-3-fluoro-3-phenyldihydro-2H-pyran-4(3H)-one (**2I**)

xyy3\_18\_1AA\_H.1.fid  
 AV-600 ZBO proton starting parameters 11/16/08 RN

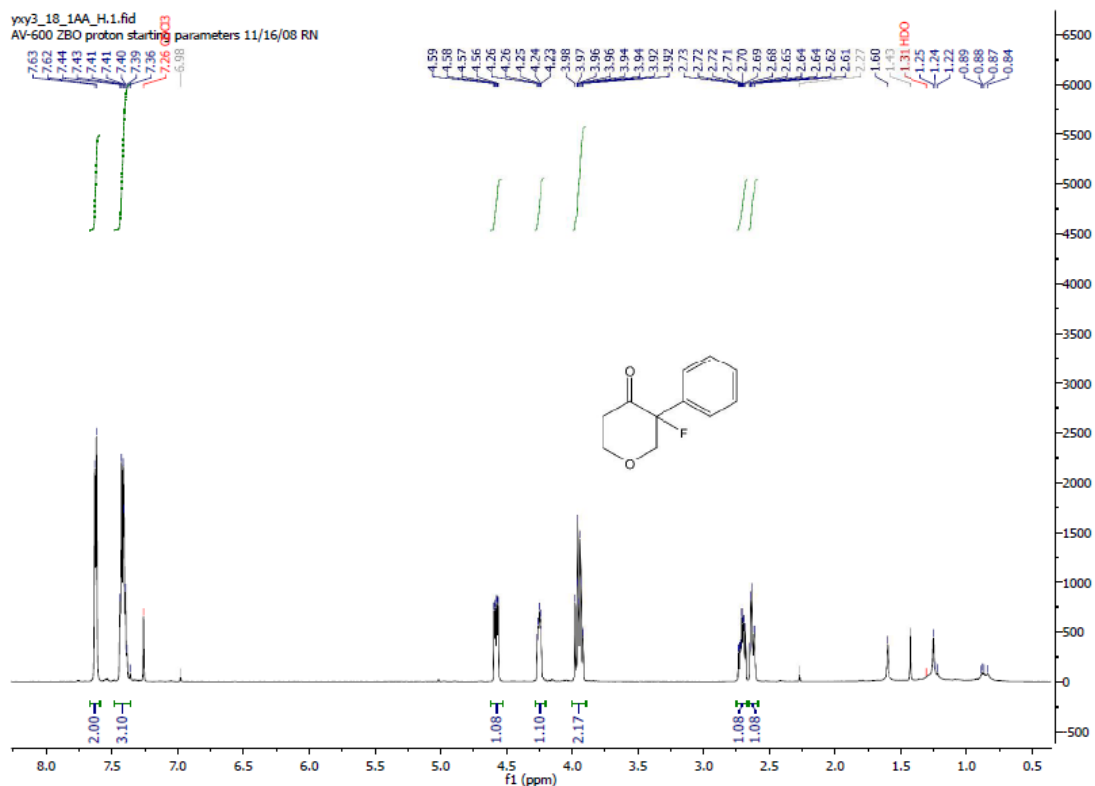



xyy3\_18\_1AA\_C.1.fid  
12/21/10 CC AV-600 ZBO carbon starting parameters  
AQ\_MOR=0QD

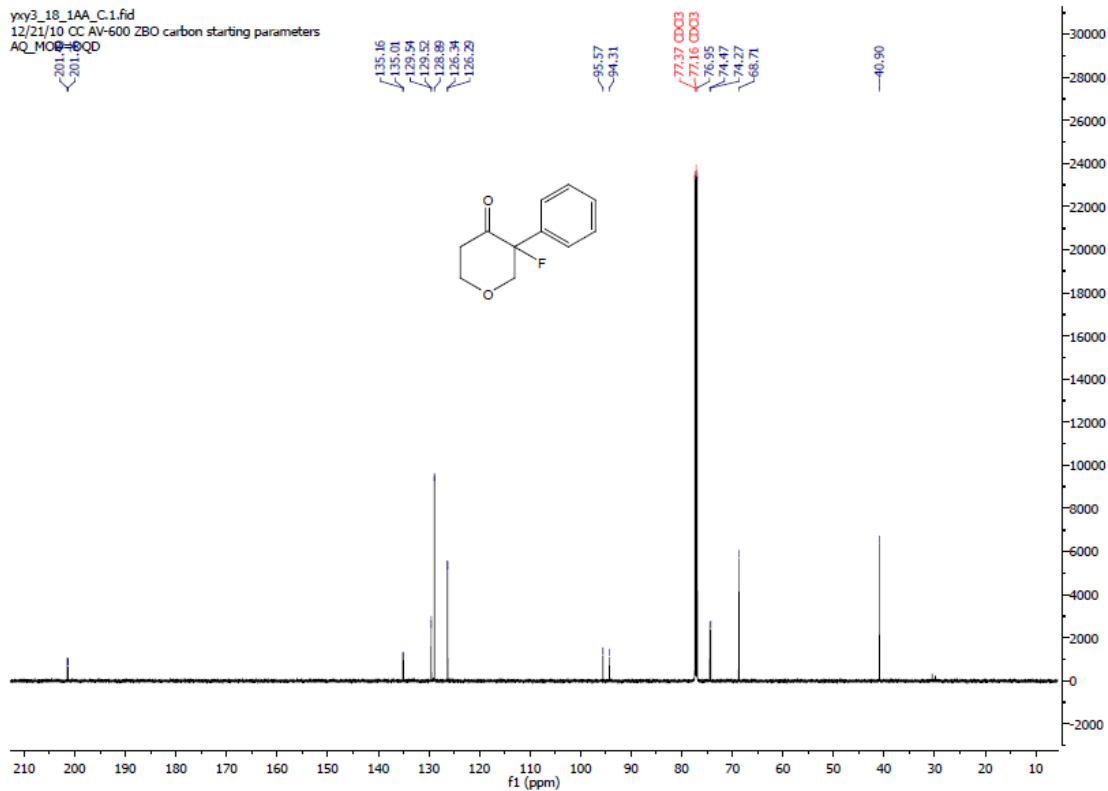

xyy3\_18\_1A\_F1.fid  
AVQ-400 QNP Probe 19F starting parameters. (revised P1, 2/12/04 RN)  
chemical shifts relative to CFCl3 at 0 ppm (082103 HvH)  
sw 239.28 ppm; o1p 0 ppm

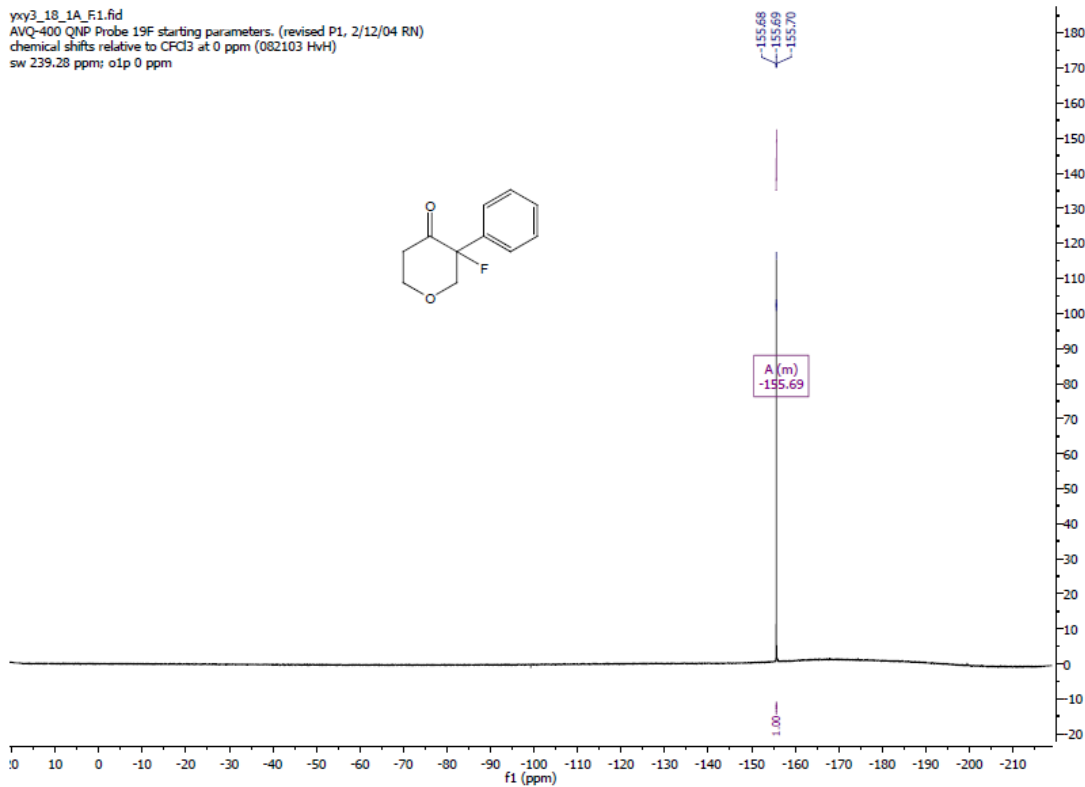

(S)-3-fluoro-3-phenyl-1-tosylpiperidin-4-one (**2m'**)

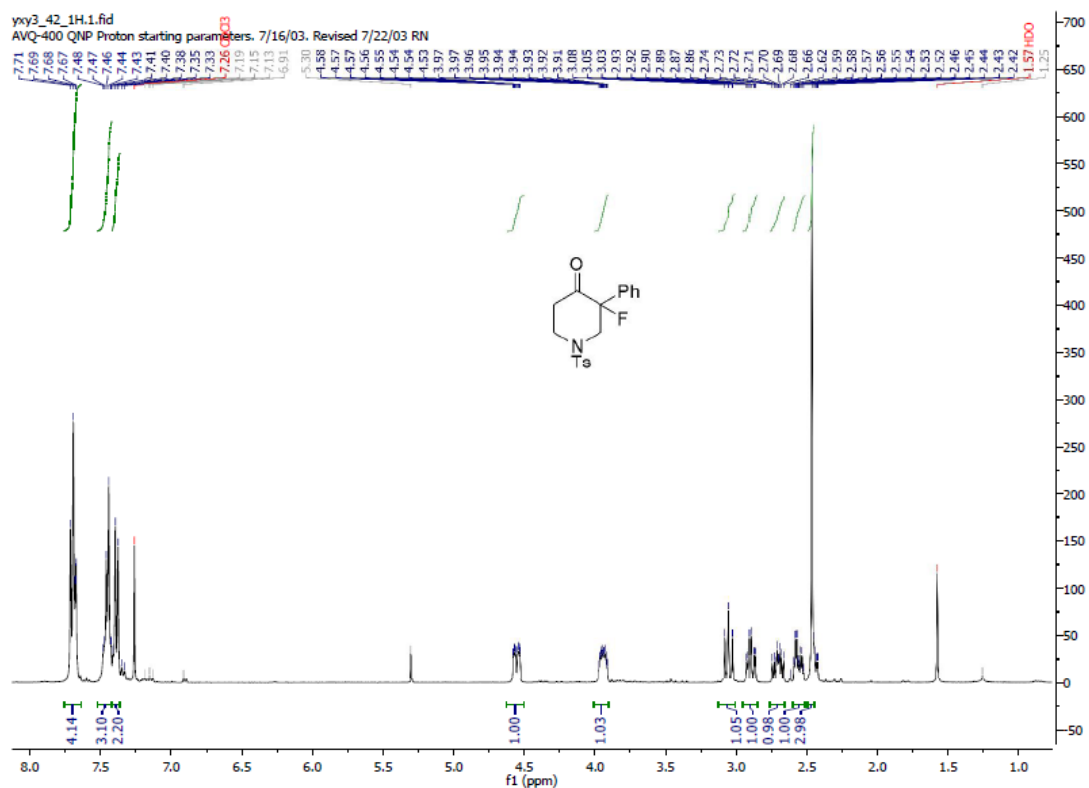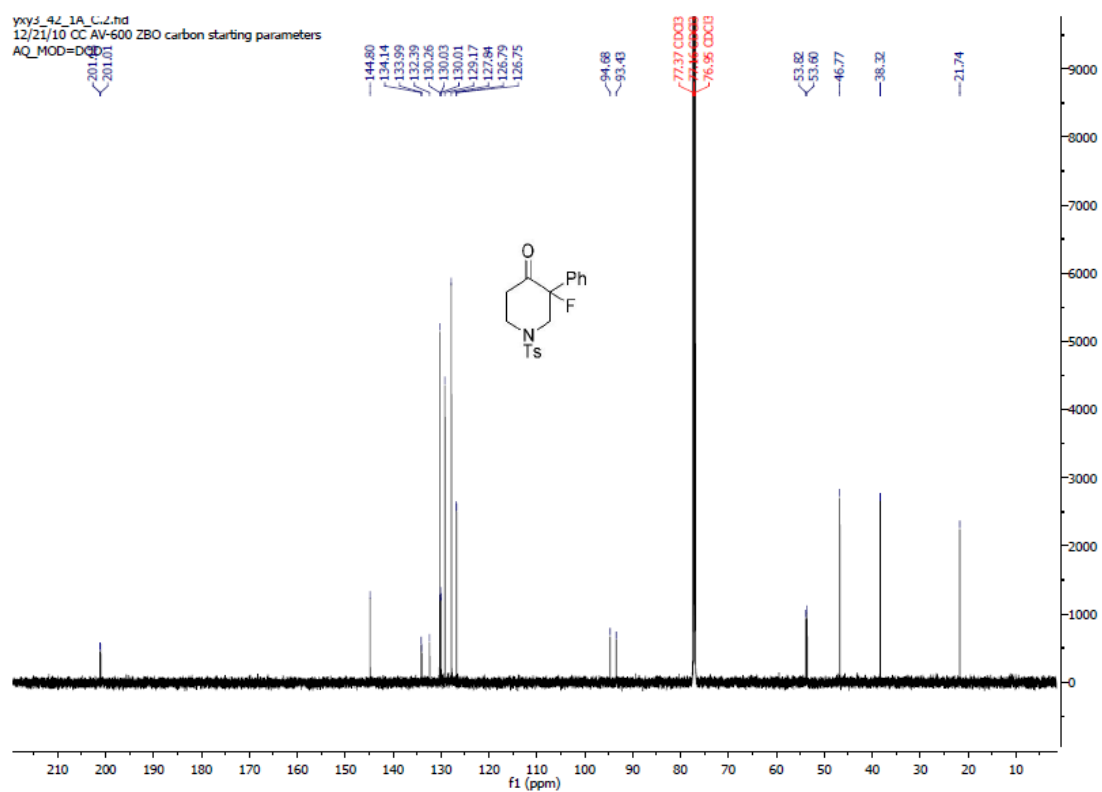

xy3\_42\_1F1.fid  
 AVQ-400 QNP Probe 19F starting parameters. (revised P1, 2/12/04 RN)  
 chemical shifts relative to CFCl3 at 0 ppm (082103 HvH)  
 sw 239.28 ppm; o1p 0 ppm

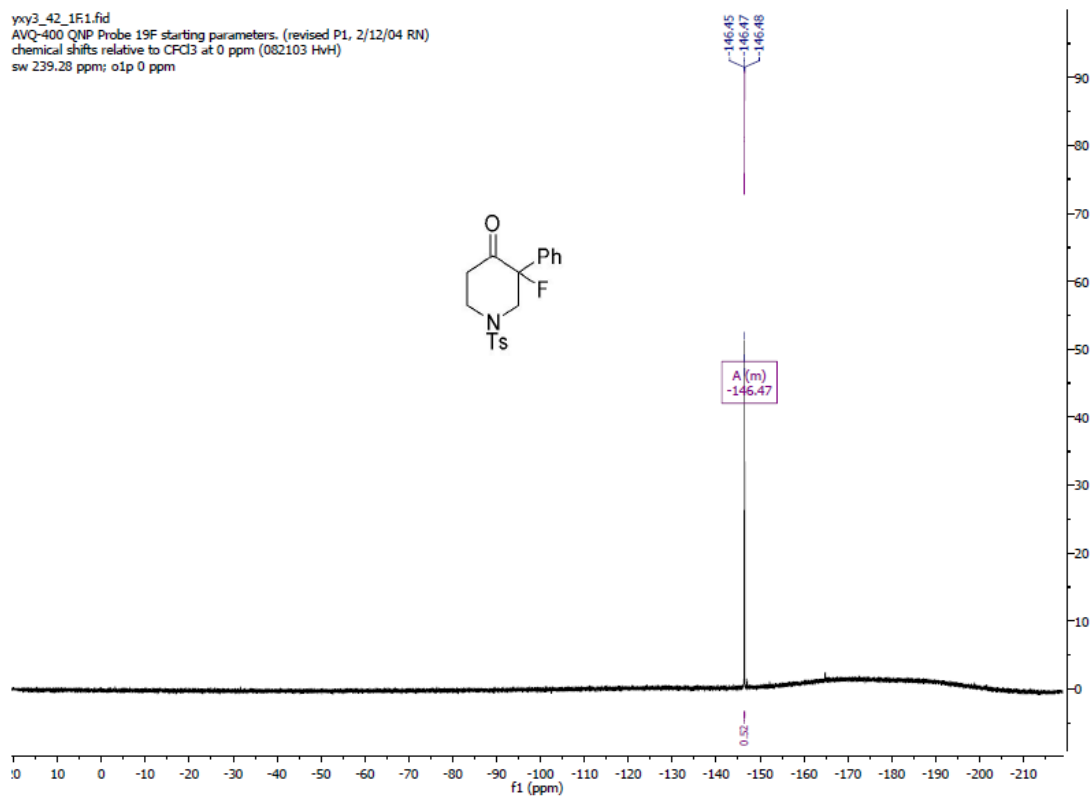

(R)-1-fluoro-[1,1'-bi(cyclohexan)]-1'-en-2-one (**2n**)

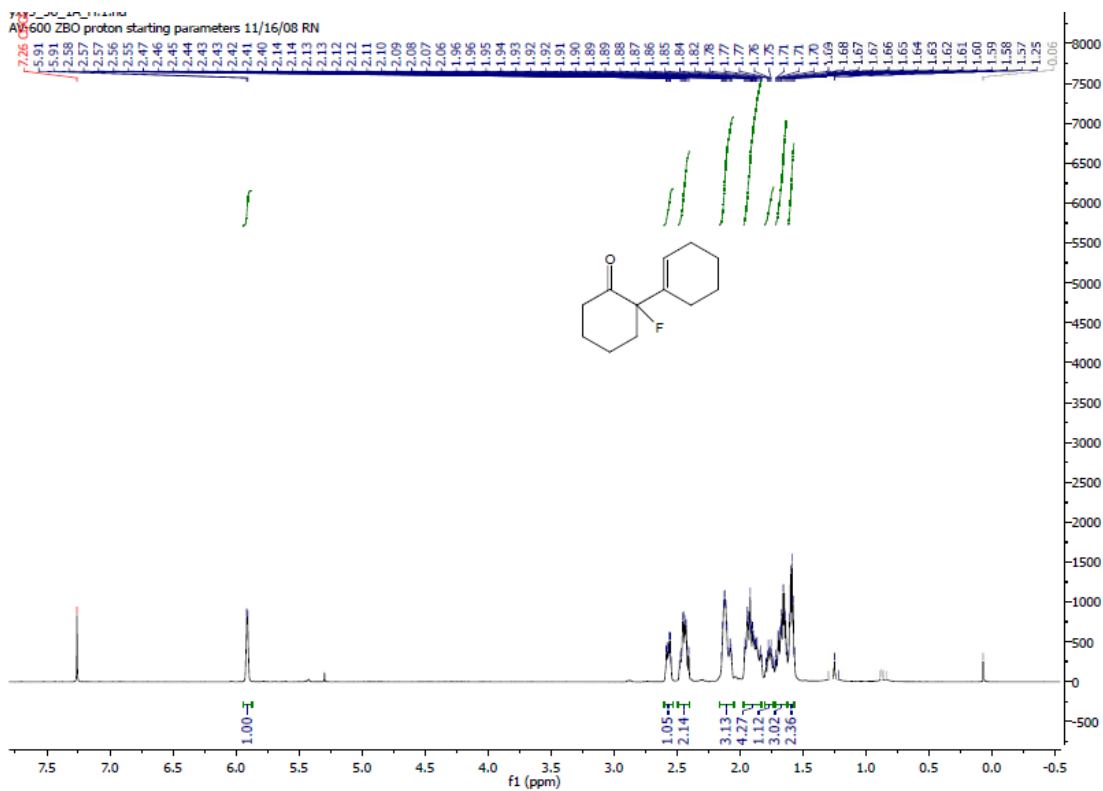

xyy3\_38\_1\_C.1.fid  
12/21/10 CC AV-600 ZBO carbon starting parameters  
AQ\_MQP=POD

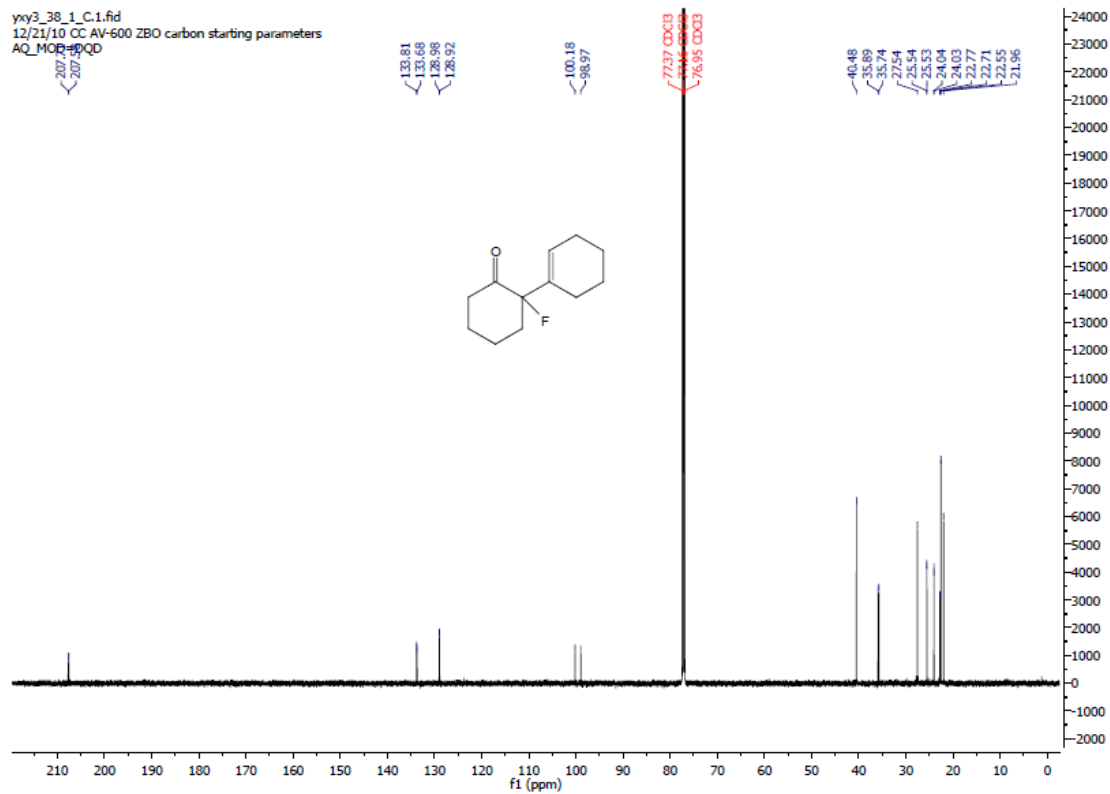

xyy3\_35\_1F1.fid  
AVQ-400 QNP Probe 19F starting parameters, (revised P1, 2/12/04 RN)  
chemical shifts relative to CFCl3 at 0 ppm (082103 HvH)  
sw 239.28 ppm; o1p 0 ppm

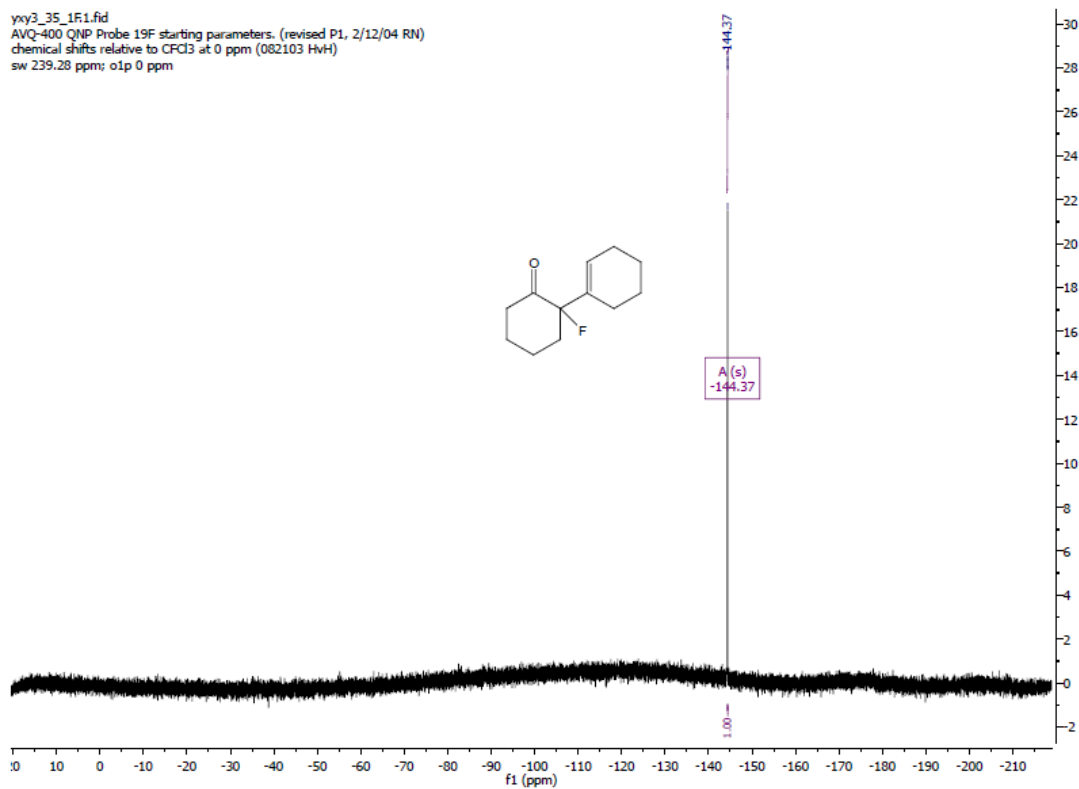

(R)-2-fluoro-2-(2-methylprop-1-en-1-yl)cyclohexanone (**2o**)

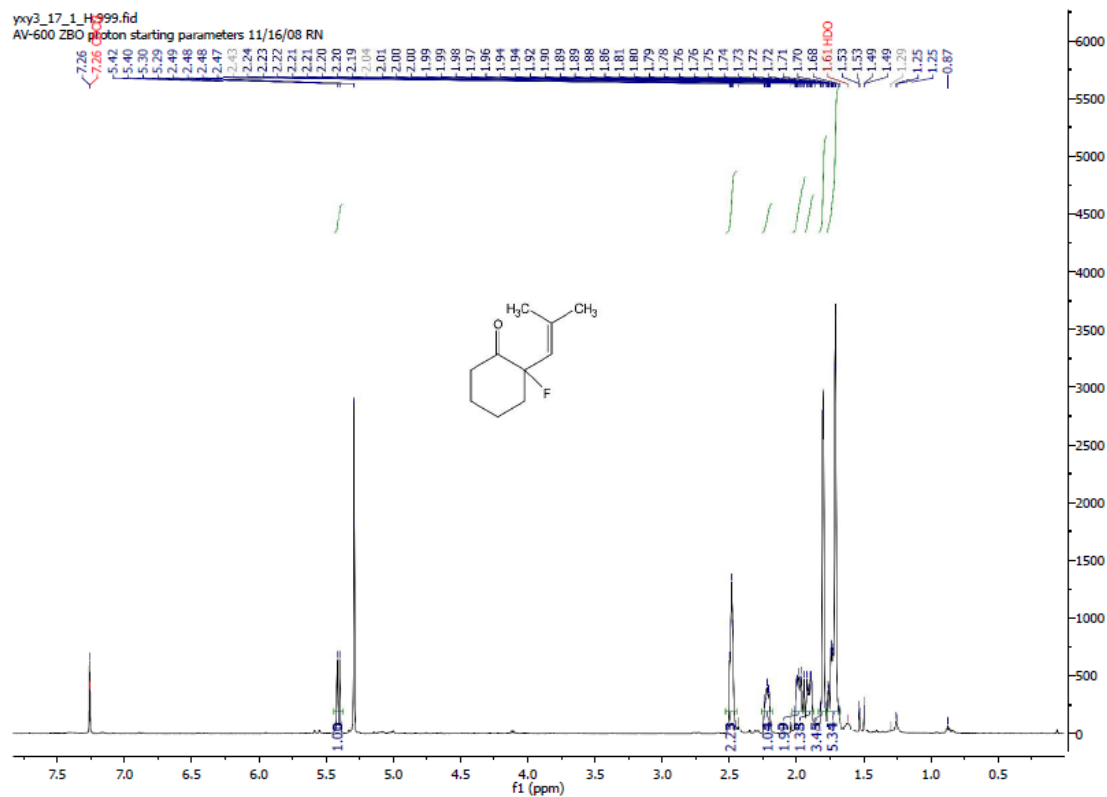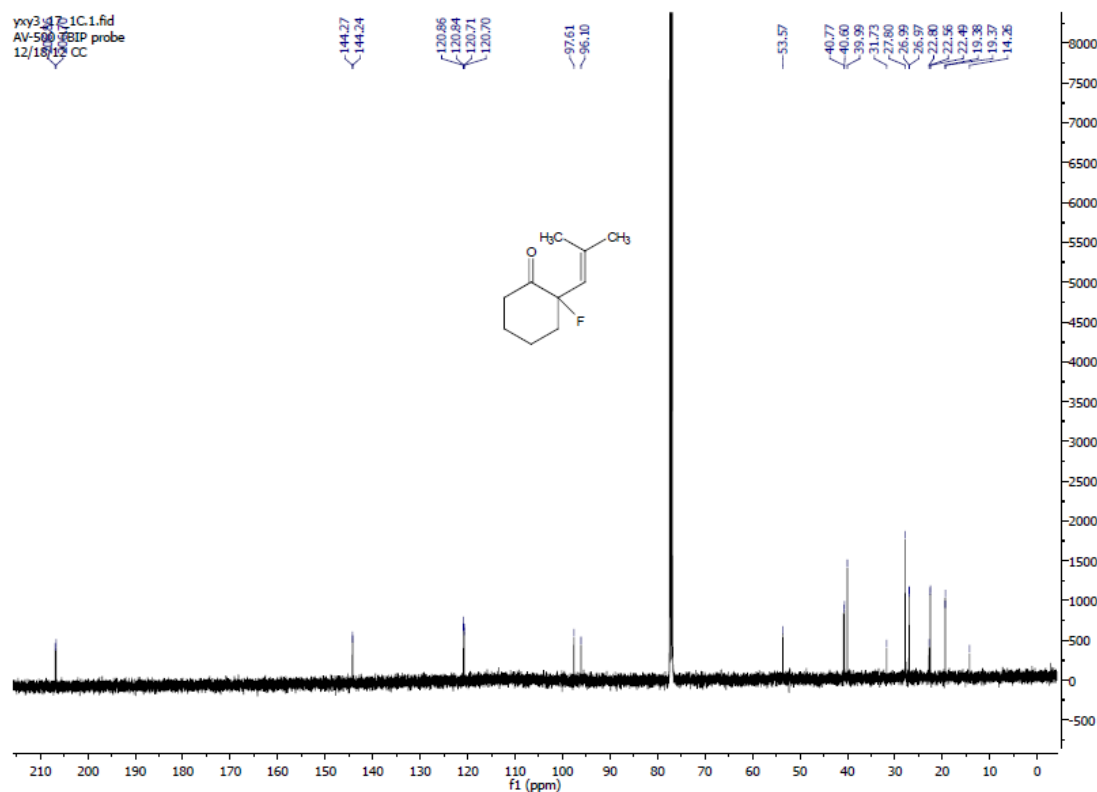

xy3\_17\_1F1.fid  
AVQ-400 QNP Probe 19F starting parameters. (revised P1, 2/12/04 RN)  
chemical shifts relative to CFC13 at 0 ppm (082103 HvH)  
sw 239.28 ppm; o1p 0 ppm

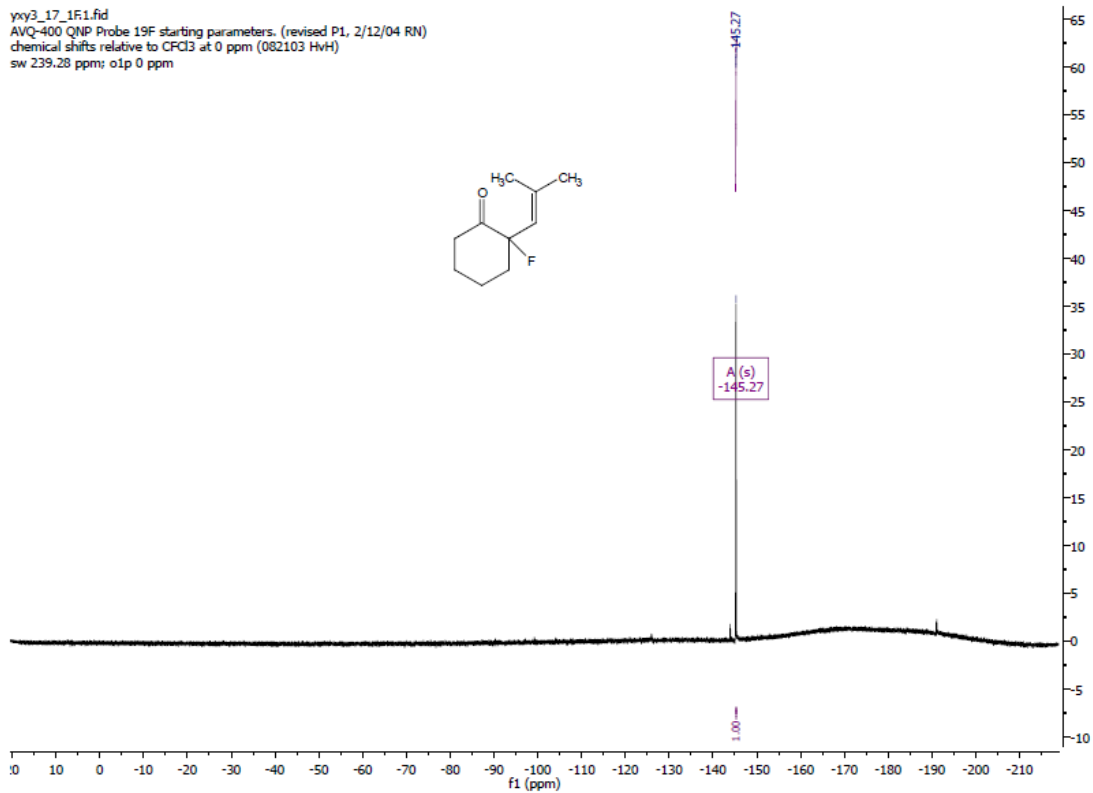

(R)-2-fluoro-2-(phenylethynyl)cyclohexanone (2p)

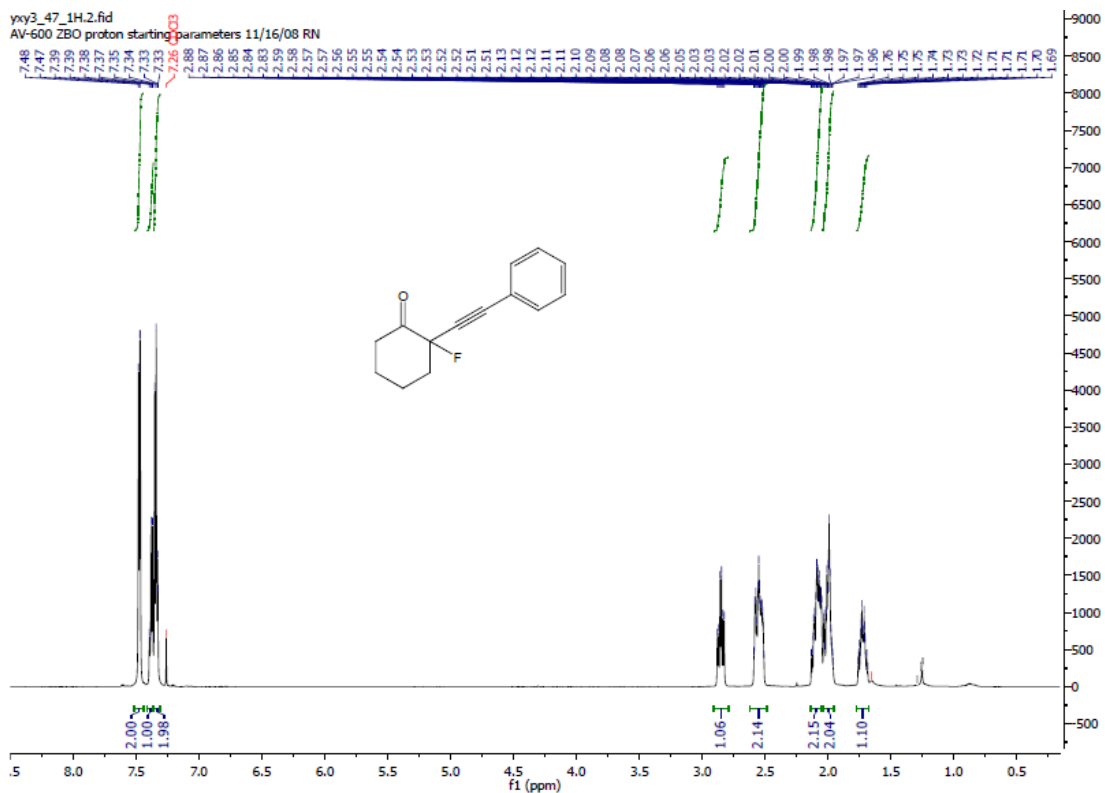

xy3\_47\_1C2.fid  
12/21/10 CC AV-600 ZBO carbon starting parameters  
AQ\_MODR000

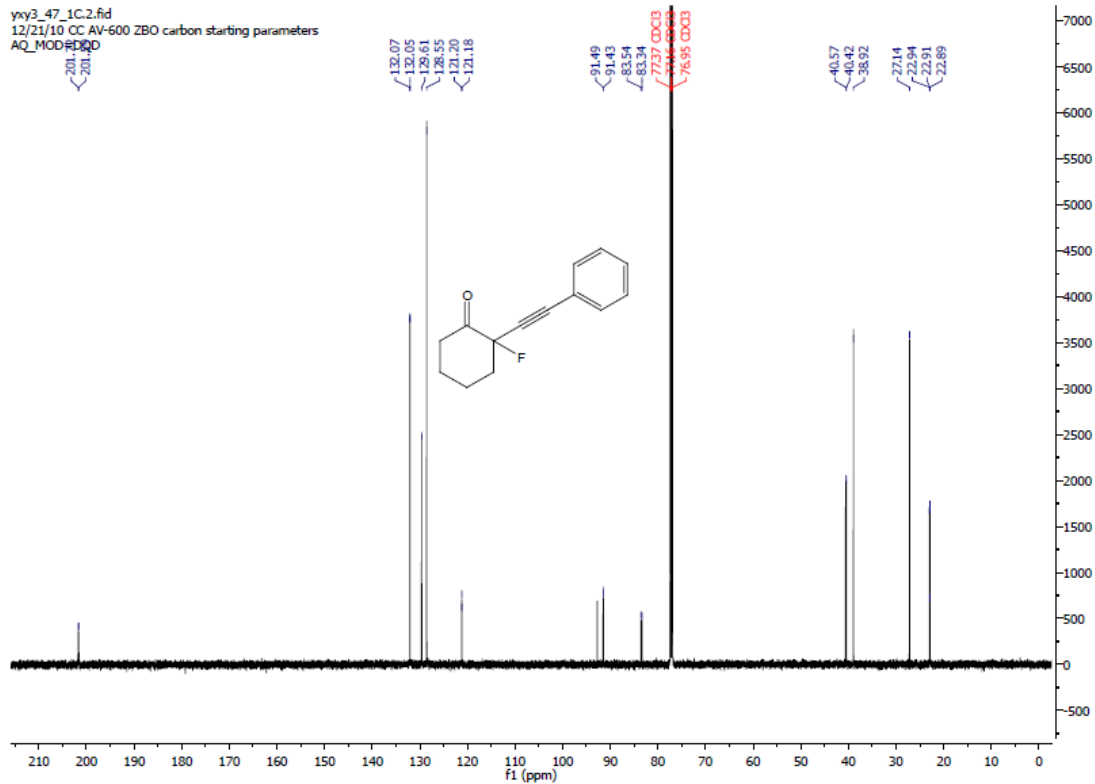

xy3\_47\_1F1.fid  
AVQ-400 QNP Probe 19F starting parameters. (revised P1, 2/12/04 RN)  
chemical shifts relative to CFC13 at 0 ppm (082103 HVH)  
sw 239.28 ppm; o1p 0 ppm

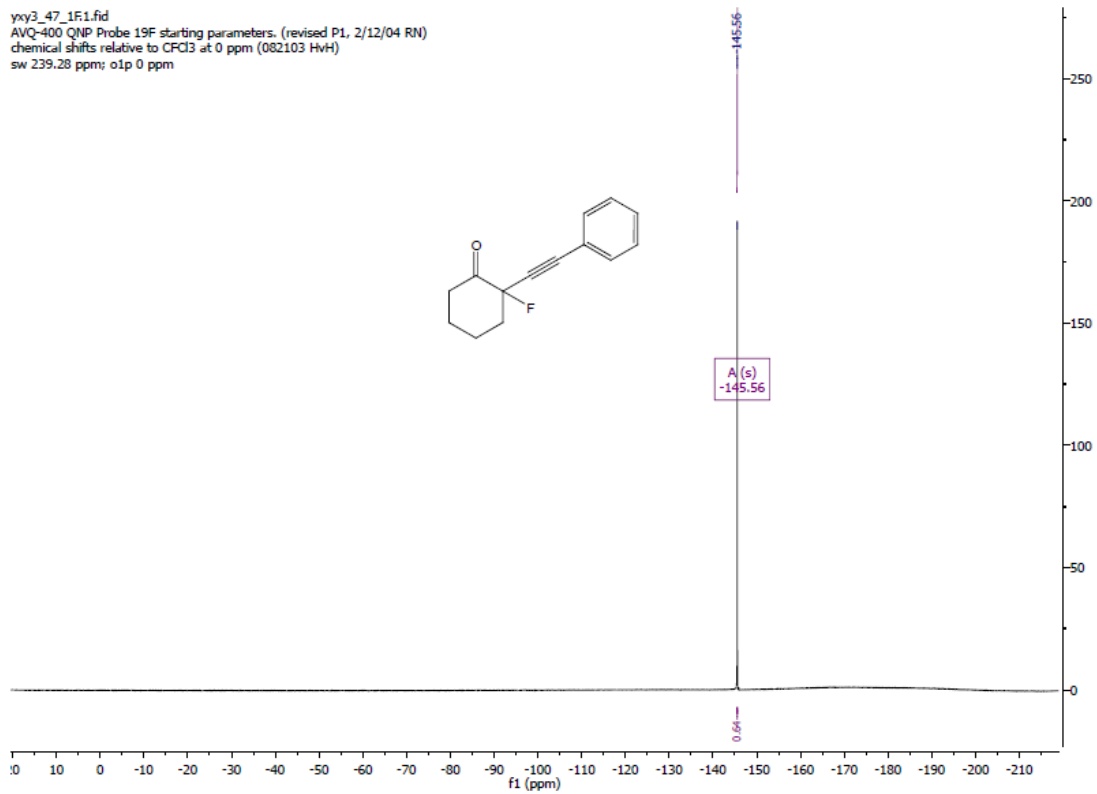

(R)-2-fluoro-2-(hex-1-yn-1-yl)cyclohexanone (**2q**)

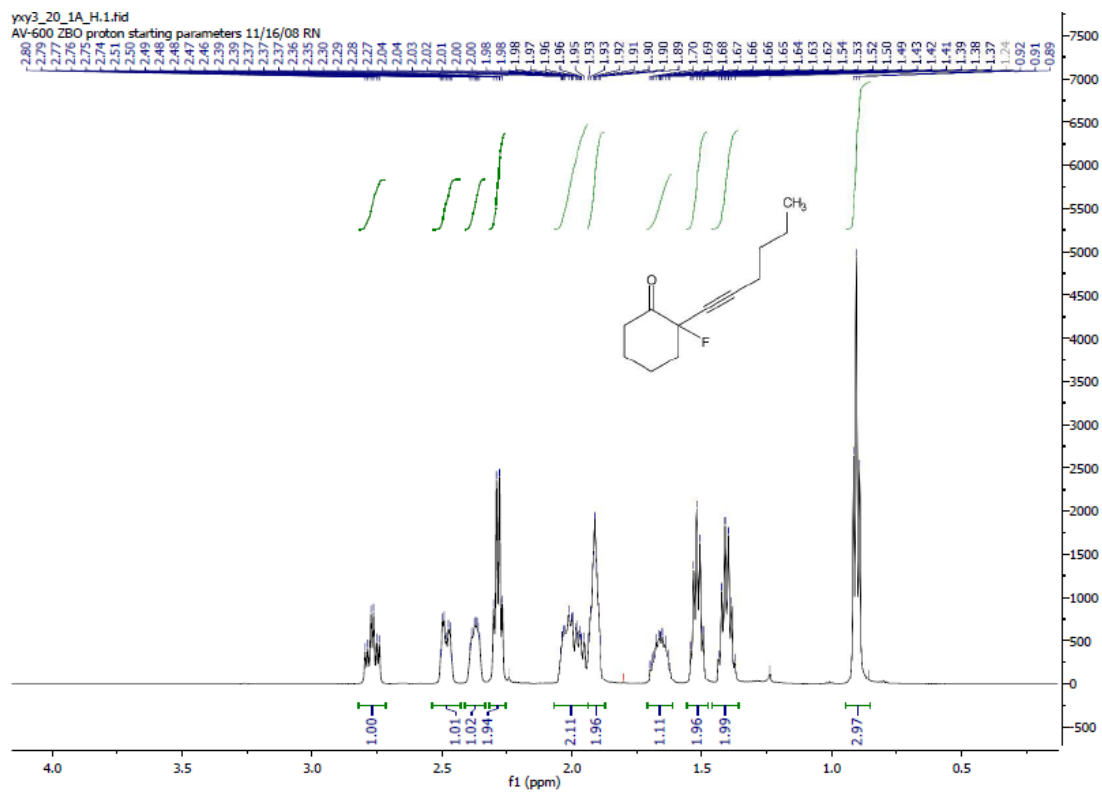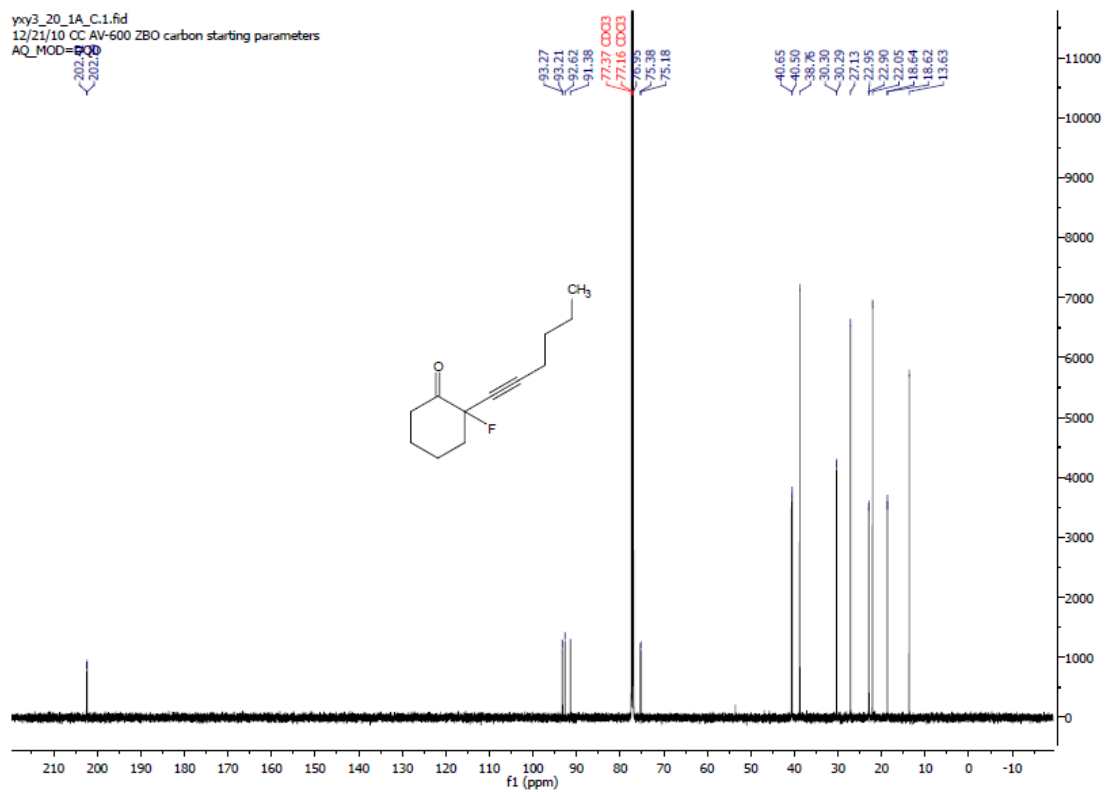



yxy2\_204-1aF1.fid  
AVQ-400 QNP Probe 19F starting parameters. (revised P1, 2/12/04 RN)  
chemical shifts relative to CFC13 at 0 ppm (082103 HvH)  
sw 239.28 ppm; o1p 0 ppm

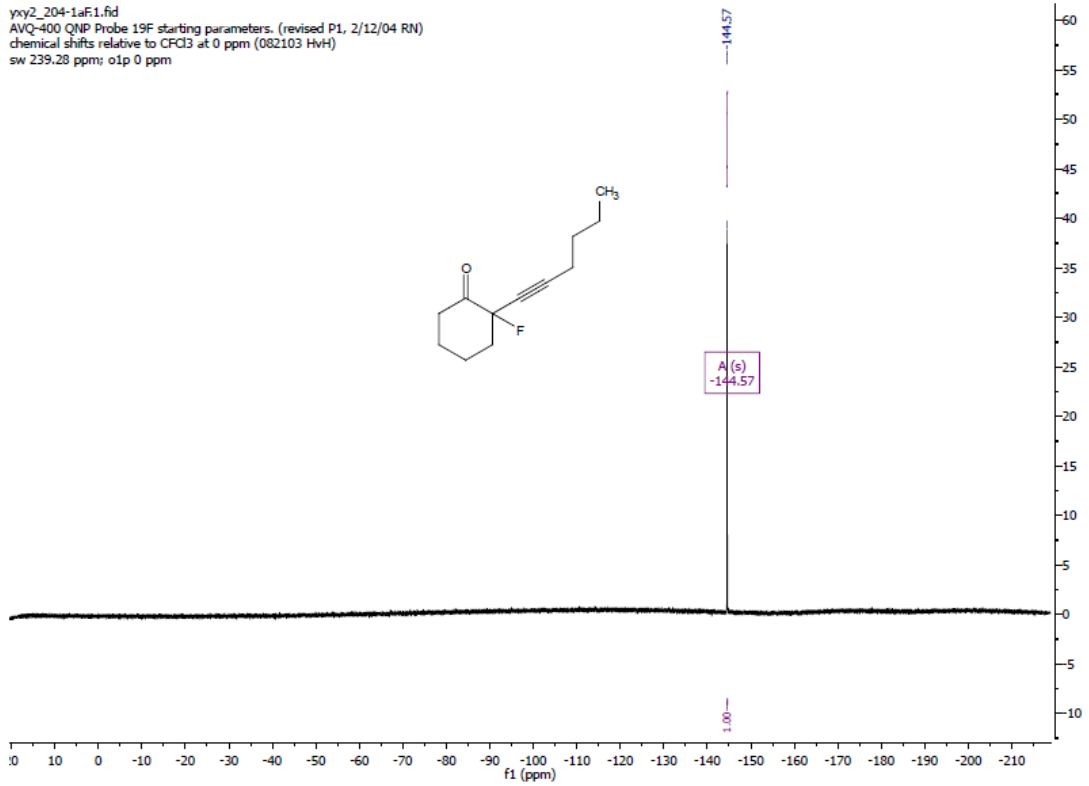

(1R,2R)-2-fluoro-1,2-diphenylcyclohexanol (**3a**)

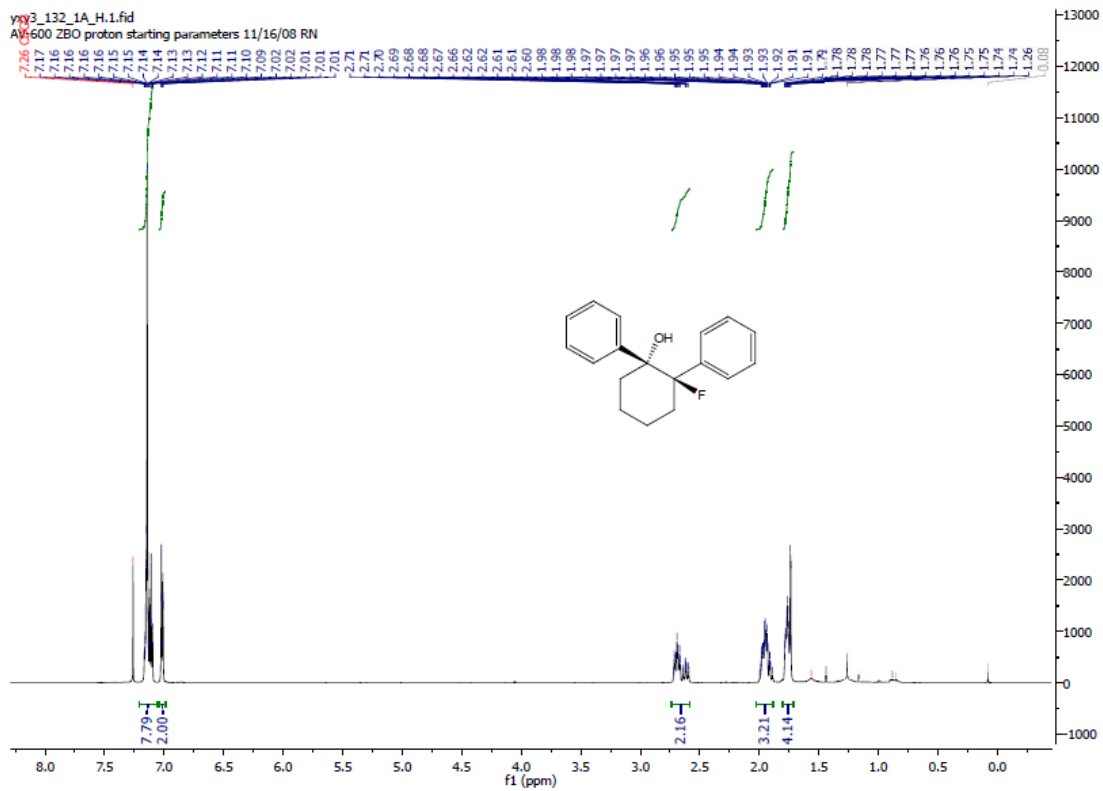

xyy3\_132\_1G1.fid  
12/21/10 CC AV-600 ZBO carbon starting parameters  
AQ\_MOD=DQD

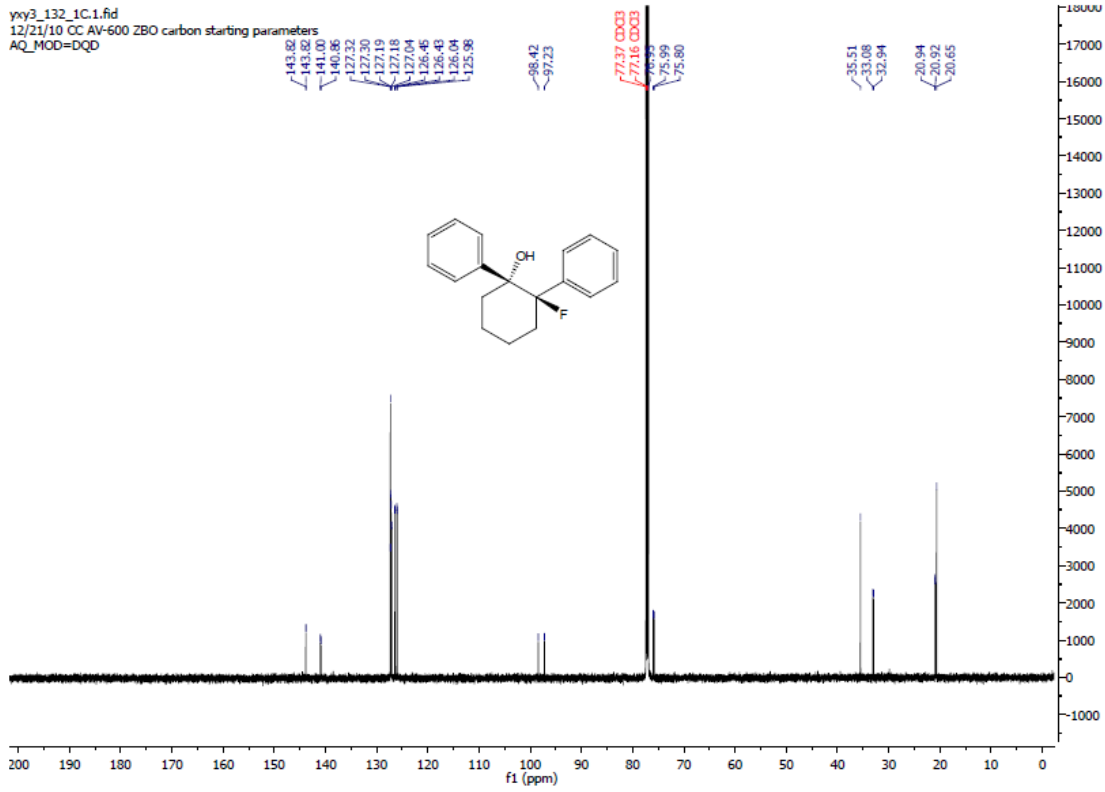

xyy3\_132\_1F1.fid  
AVQ-400 QNP Probe 19F starting parameters. (revised P1, 2/12/04 RN)  
chemical shifts relative to CFCl3 at 0 ppm (082103 HvH)  
sw 239.28 ppm; o1p 0 ppm

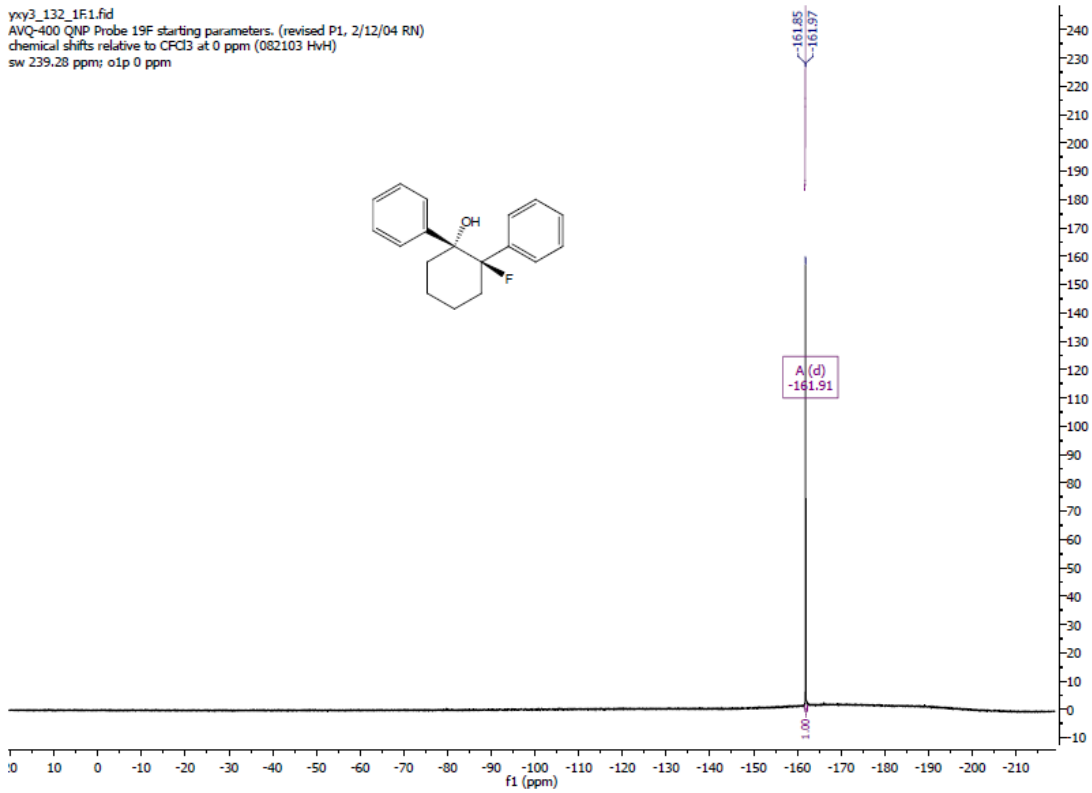



xy3\_117\_1F1.fid  
 AVQ-400 QNP Probe 19F starting parameters. (revised P1, 2/12/04 RN)  
 chemical shifts relative to CFCl3 at 0 ppm (082103 HVH)  
 sw 239.28 ppm; o1p 0 ppm

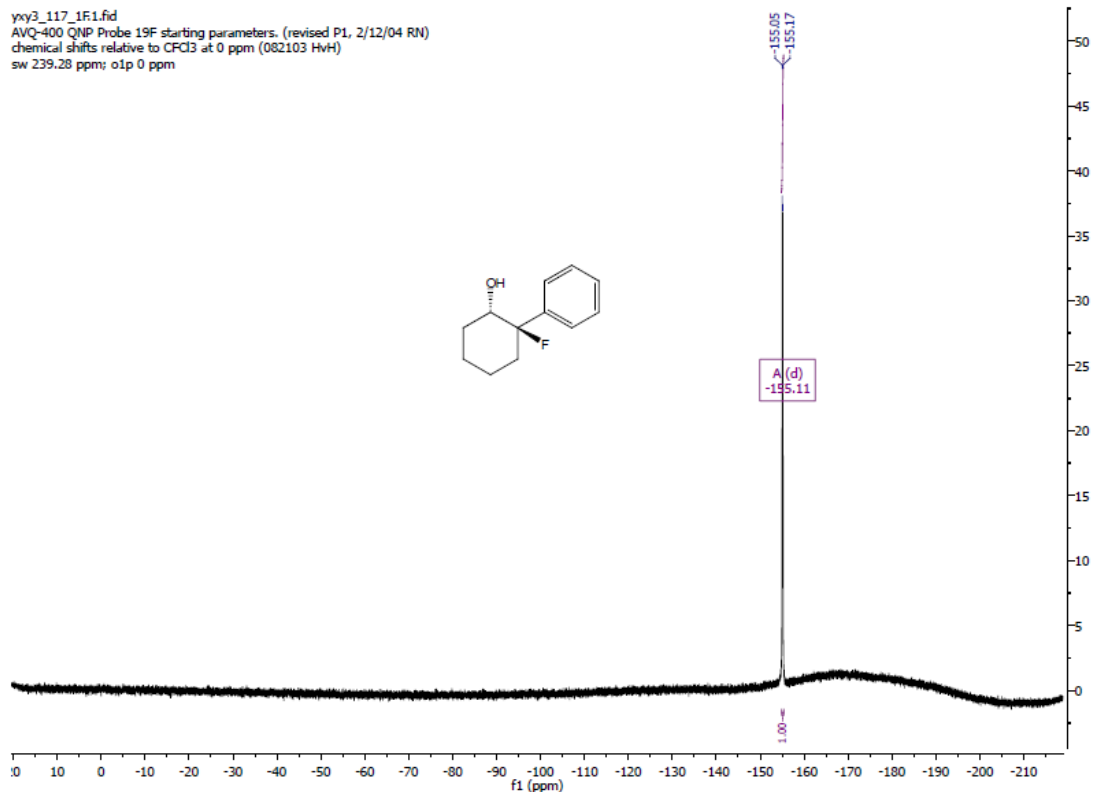

(*S,E*)-methyl 2-(2-fluoro-2-phenylcyclohexylidene)acetate (**3c**)

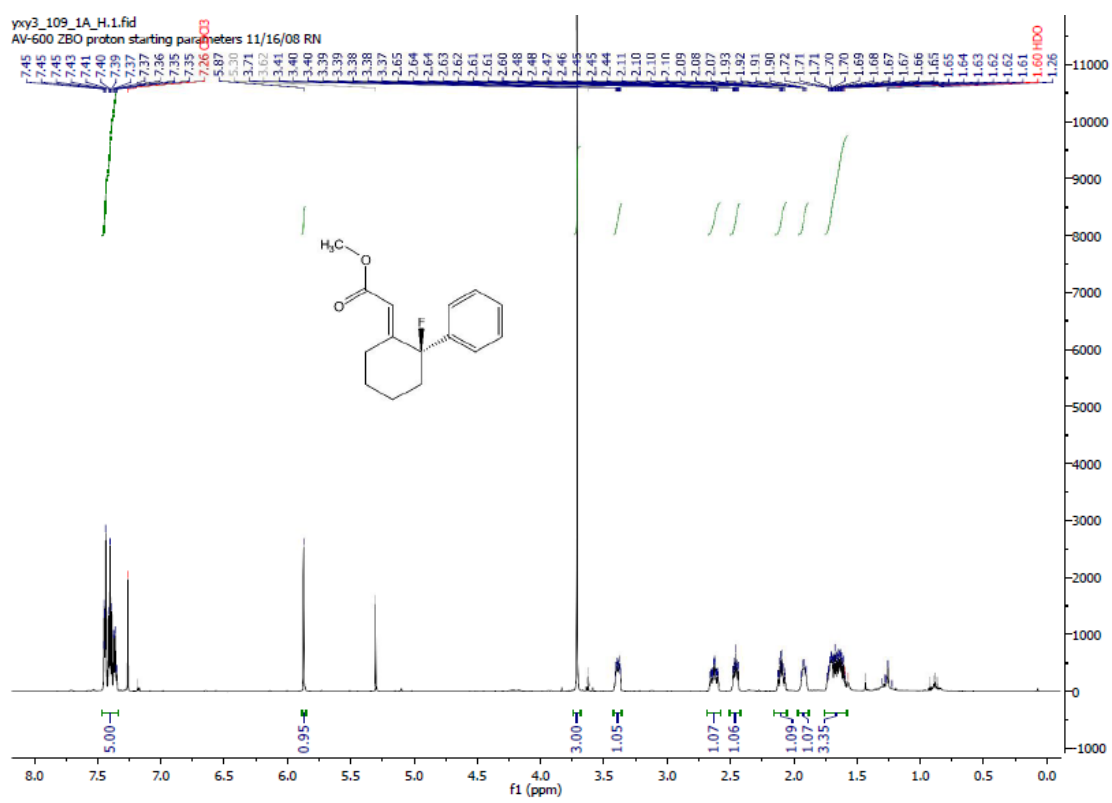

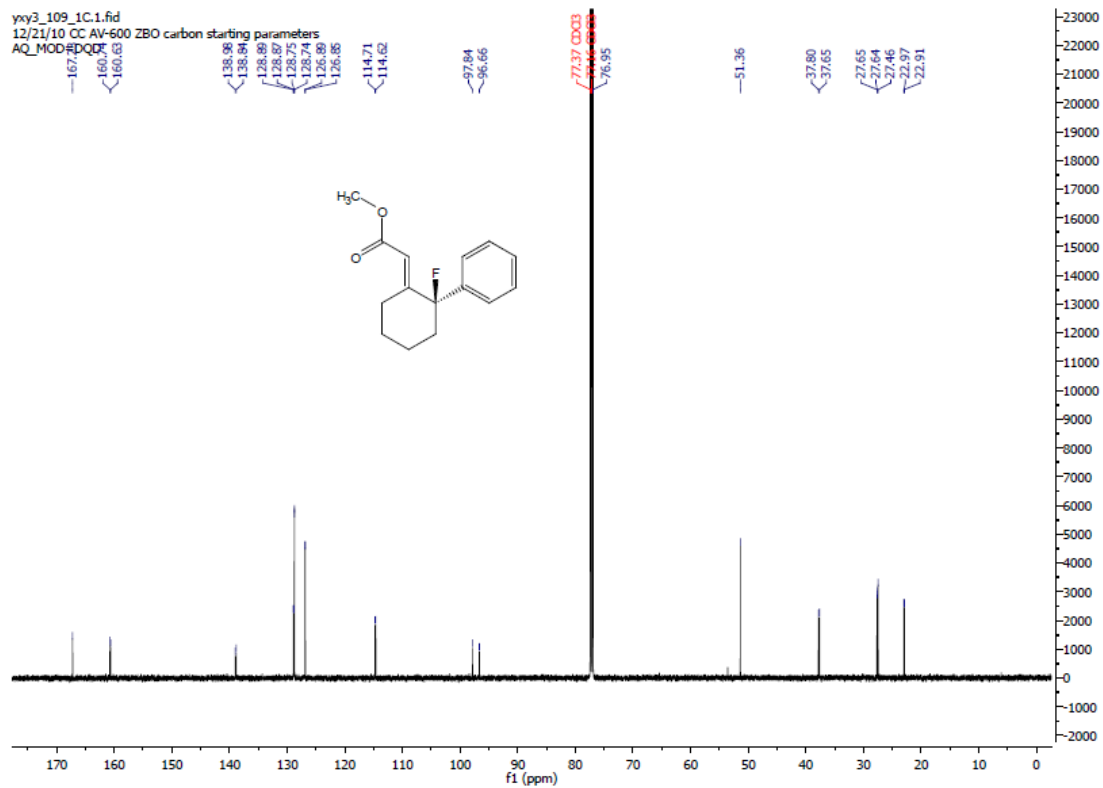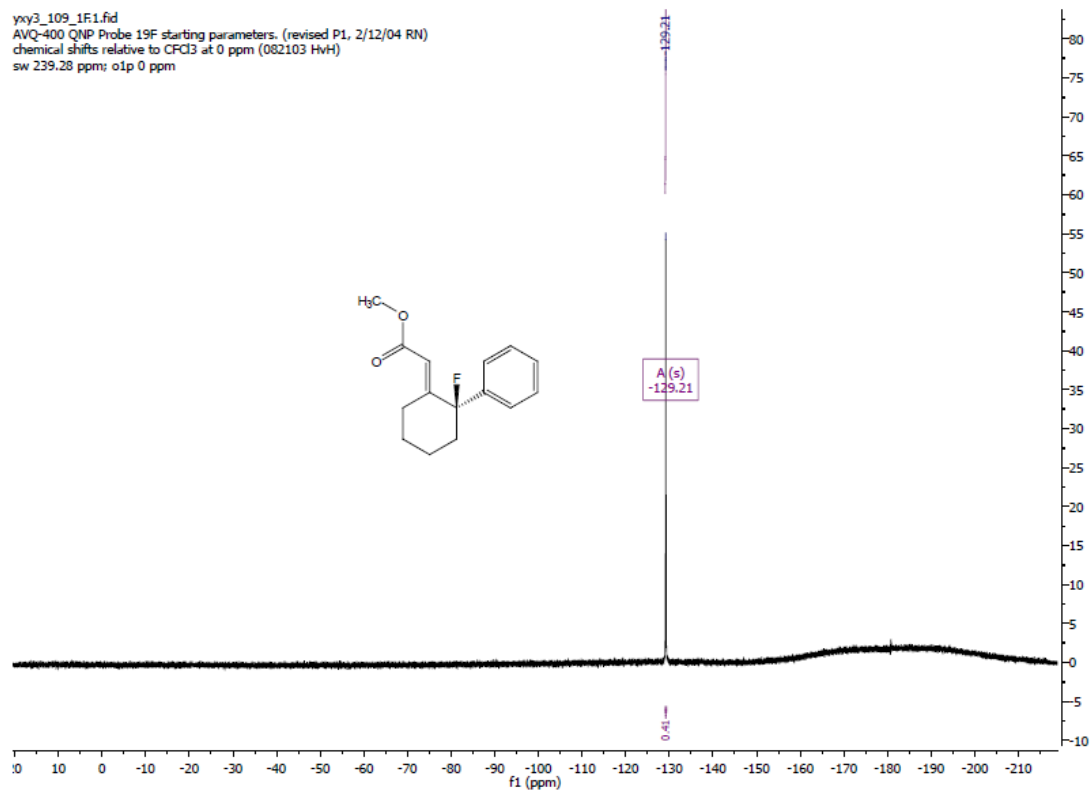

(R)-2-([1,1'-biphenyl]-3-yl)-2-fluorocyclohexanone (**3d**)

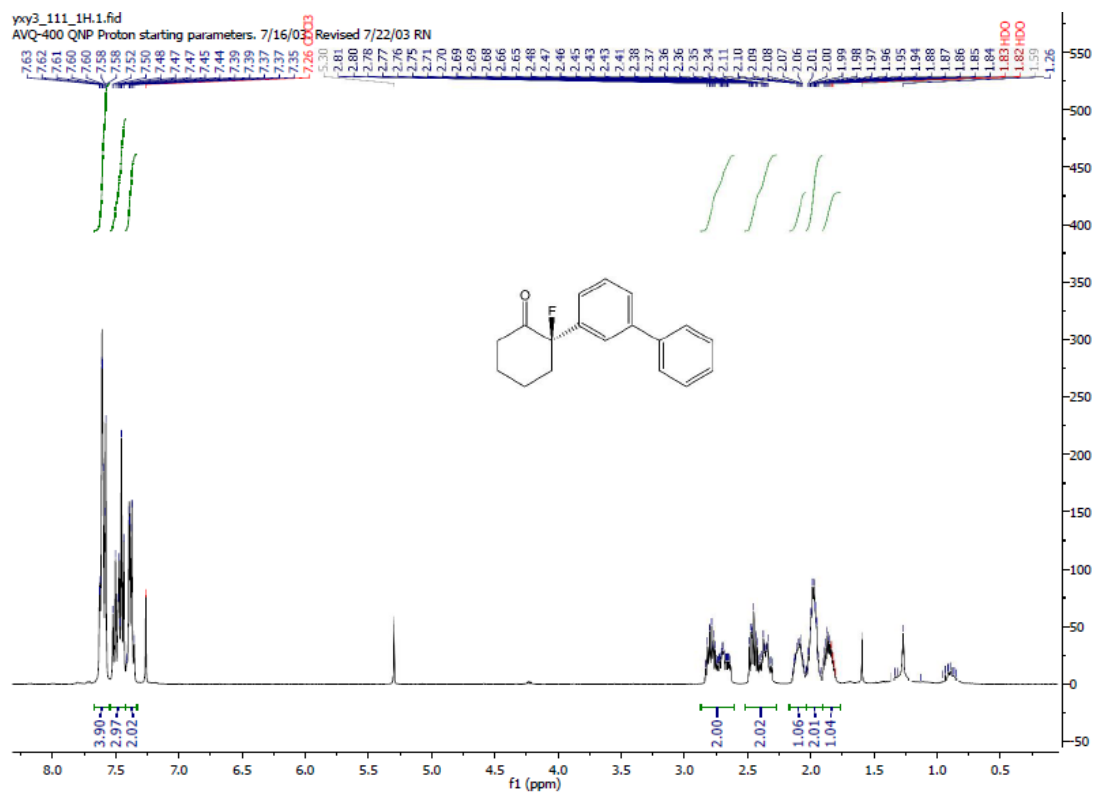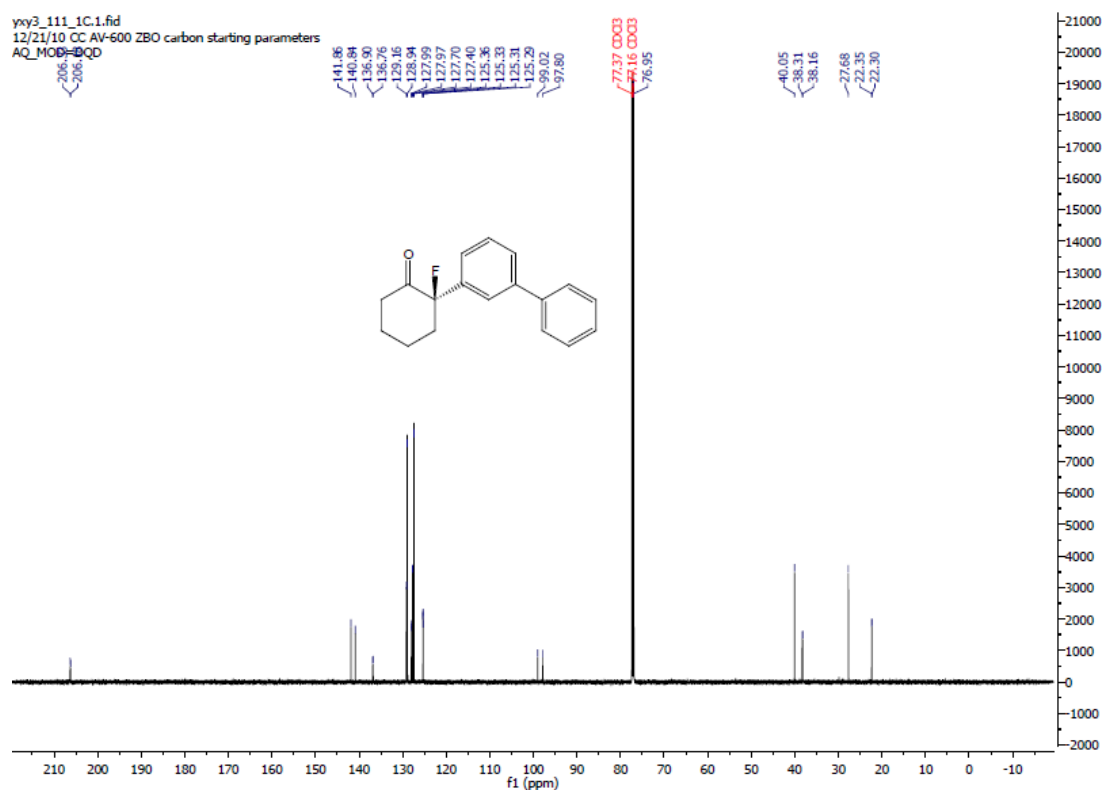

xyy2\_111\_1F1.fid  
AVQ-400 QNP Probe 19F starting parameters. (revised P1, 2/12/04 RN)  
chemical shifts relative to CFCl3 at 0 ppm (062103 HvH)  
sw 239.28 ppm; o1p 0 ppm

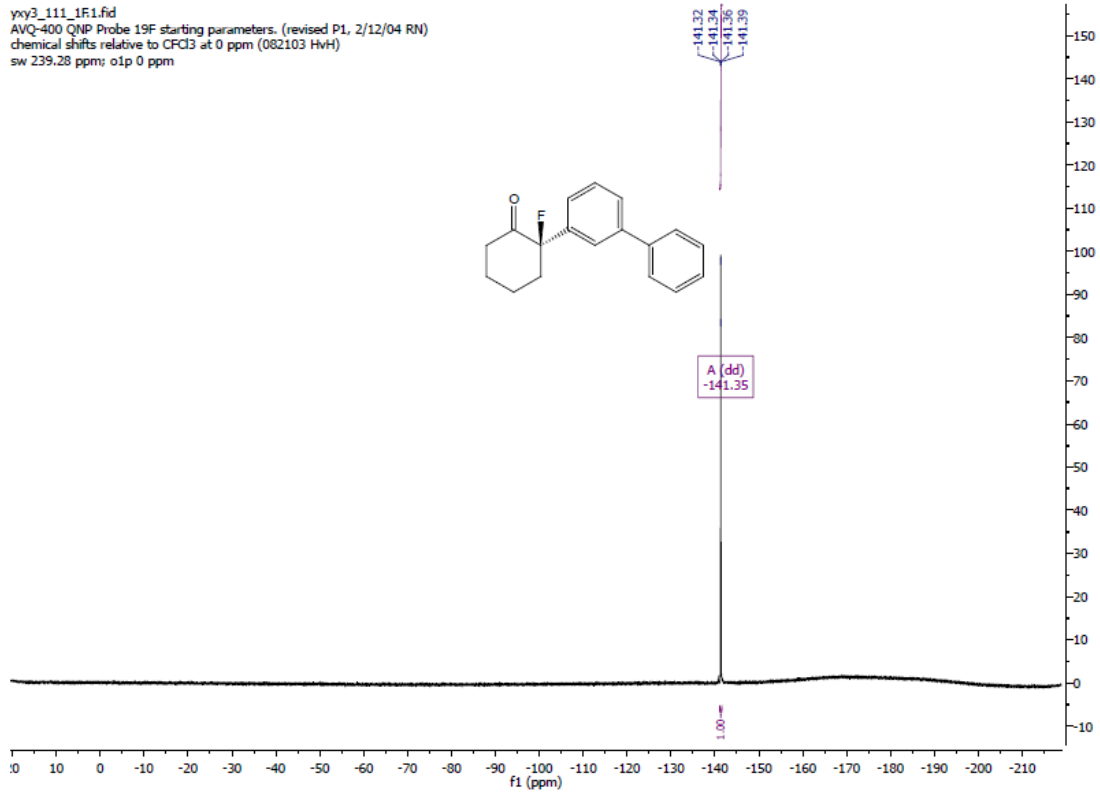

Supplement: ja500882x_si_002.pdf [file ja500882x_si_002.pdf]
